# Supplementary material for: Solution and solid-state fluorescence of 2-(2′-hydroxyphenyl)-1,5-benzodiazepin-2-one (HBD) borate complexes
Source: Royal Society of Chemistry journal article supplement (doi:10.1039/c6ra19246g), 2016-01-01
Supplement: c6ra19246g1.pdf [file c6ra19246g1.pdf]

## Supplementary Information

### **Solution and solid-state fluorescence of 2-(2'-Hydroxyphenyl) 1,5-benzodiazepin-2-one (HBD) borate complexes**

Hasan Mtiraoui,<sup>a</sup> Rafik Gharbi,<sup>a</sup> Moncef Msaddek,<sup>a,\*</sup> Yann Bretonnière,<sup>b</sup> Chantal Andraud,<sup>b</sup> Pierre-Yves Renard,<sup>c</sup> and Cyrille Sabot,<sup>c,\*</sup>

<sup>a.</sup> *Université Monastir, Laboratory of Heterocyclic Chemistry Natural Products and Reactivity/CHPNR, Department of Chemistry, Faculty of Science of Monastir, 5000 Monastir (Tunisia).*

<sup>b.</sup> *Université Lyon, ENS de Lyon, CNRS, Université Lyon 1, Laboratoire de Chimie, 69342 Lyon, (France).*

<sup>c.</sup> *Normandie Univ, CNRS, UNIROUEN, INSA Rouen, COBRA (UMR 6014), 76000 Rouen, (France).*

**I. Copies of <sup>1</sup>H and <sup>13</sup>C NMR.....S2-S32**

**II. Crystallographic data.....S33-S43**

# I. Copies of $^1\text{H}$ , and $^{13}\text{C}$ NMR

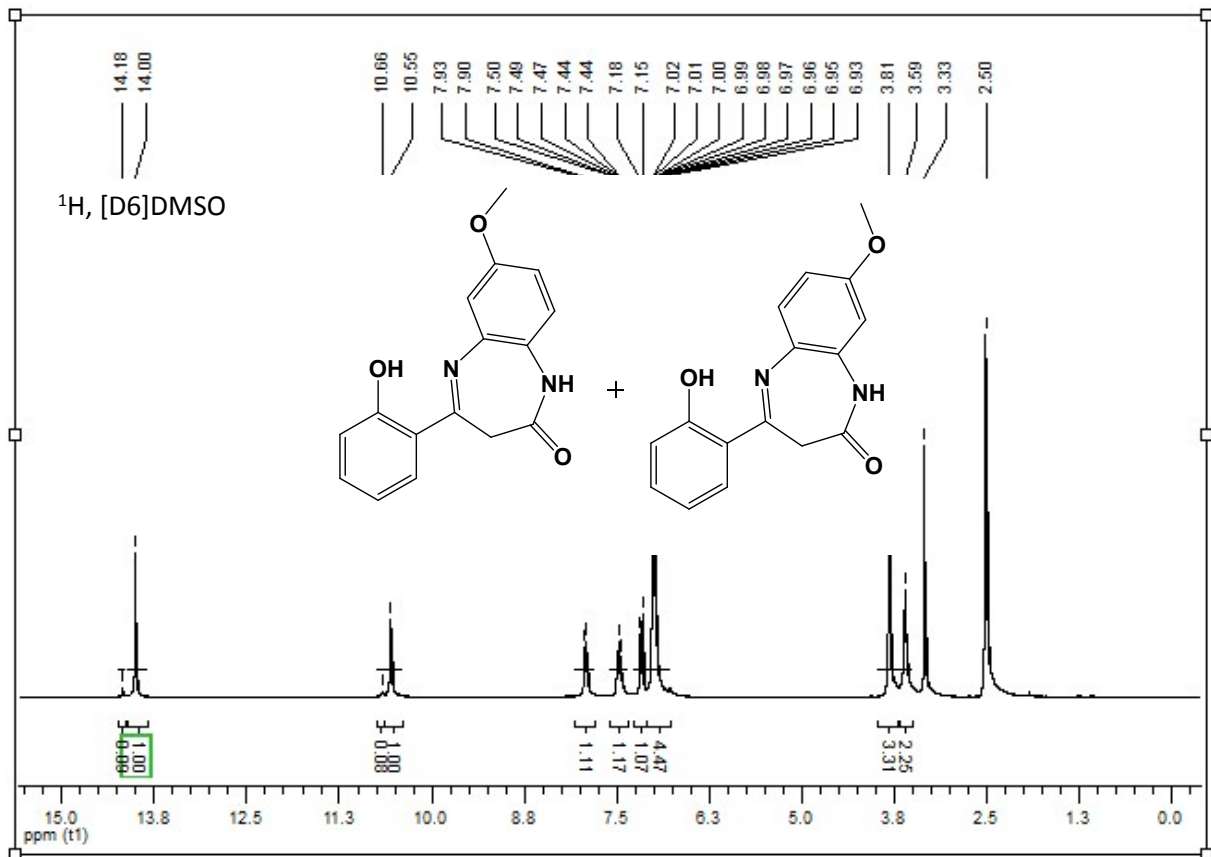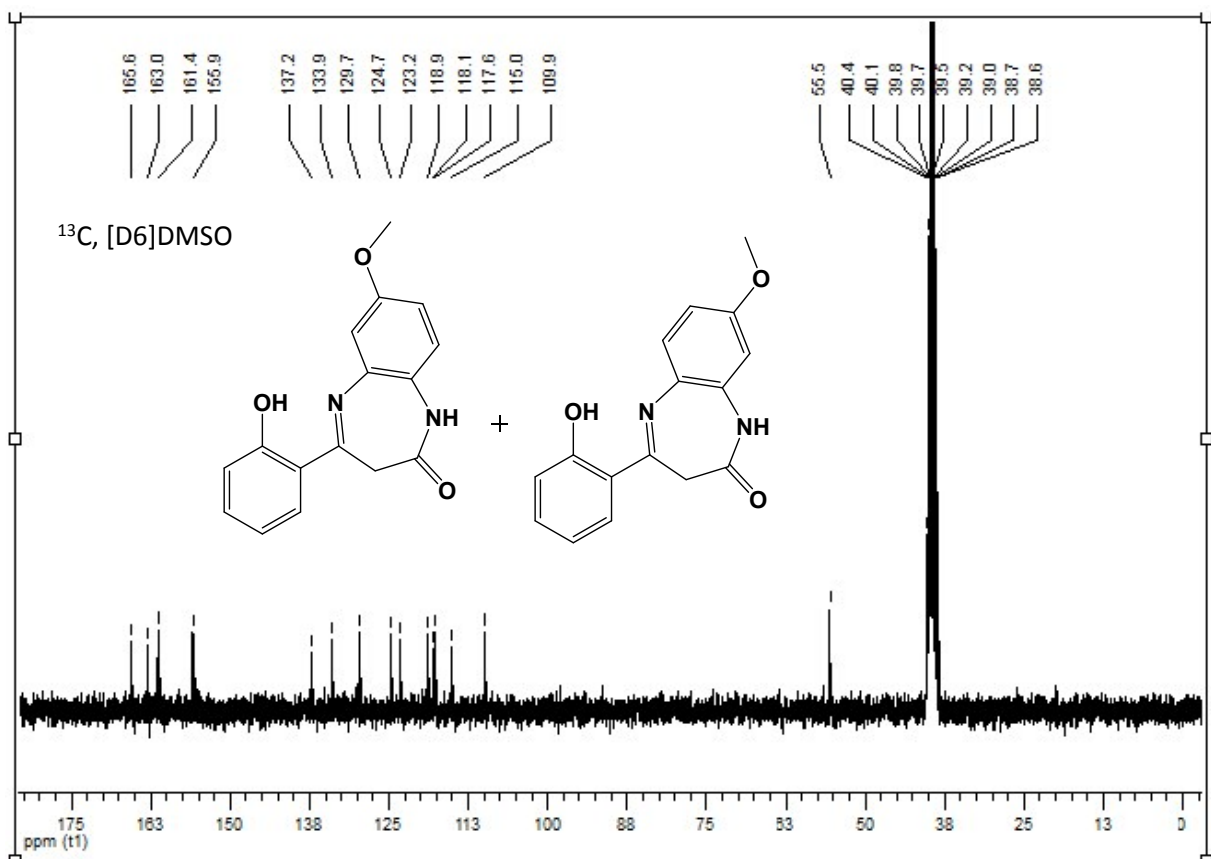

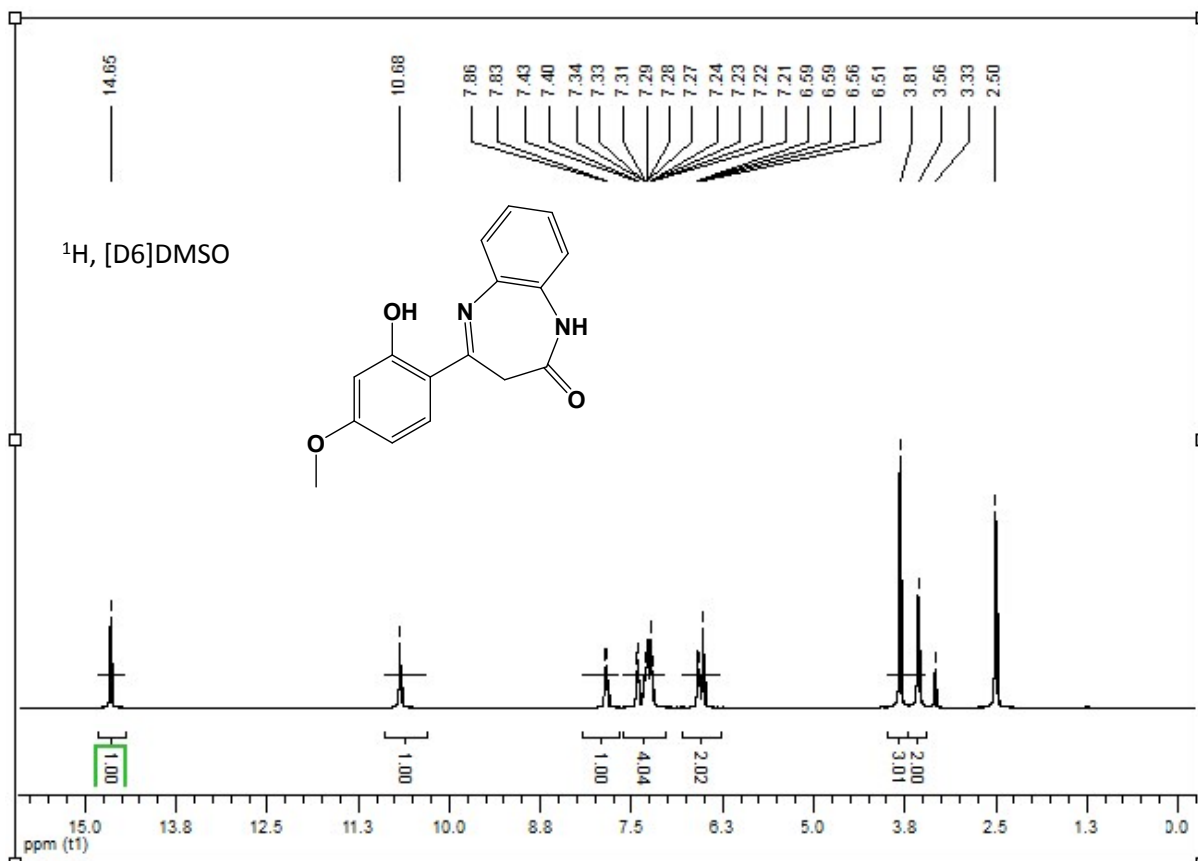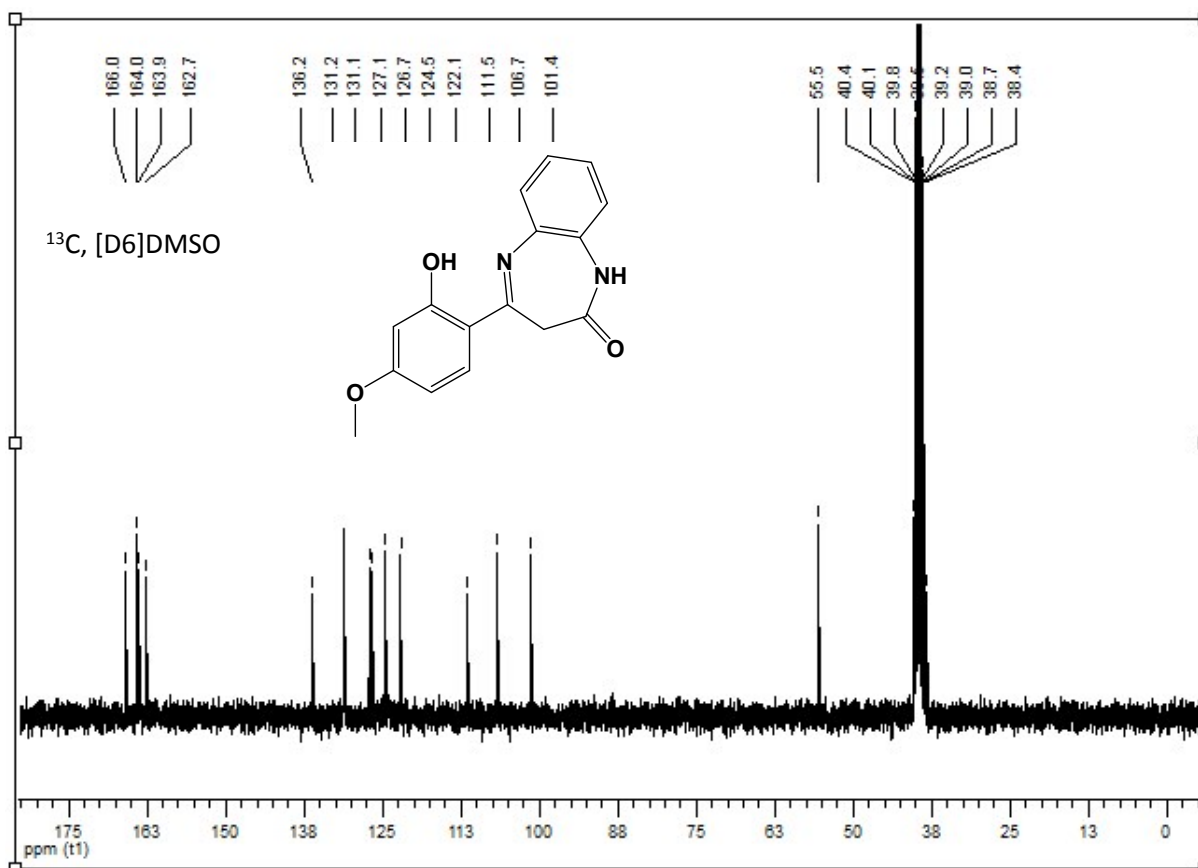

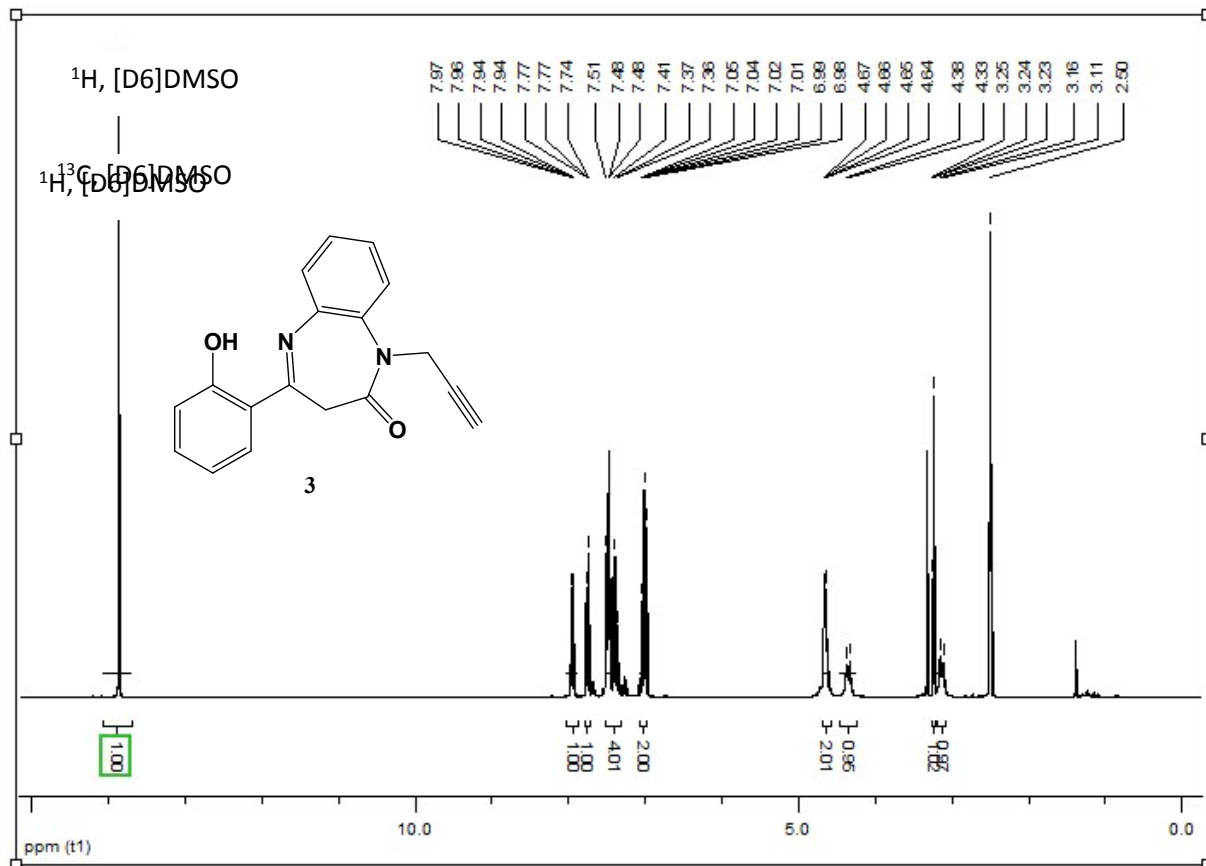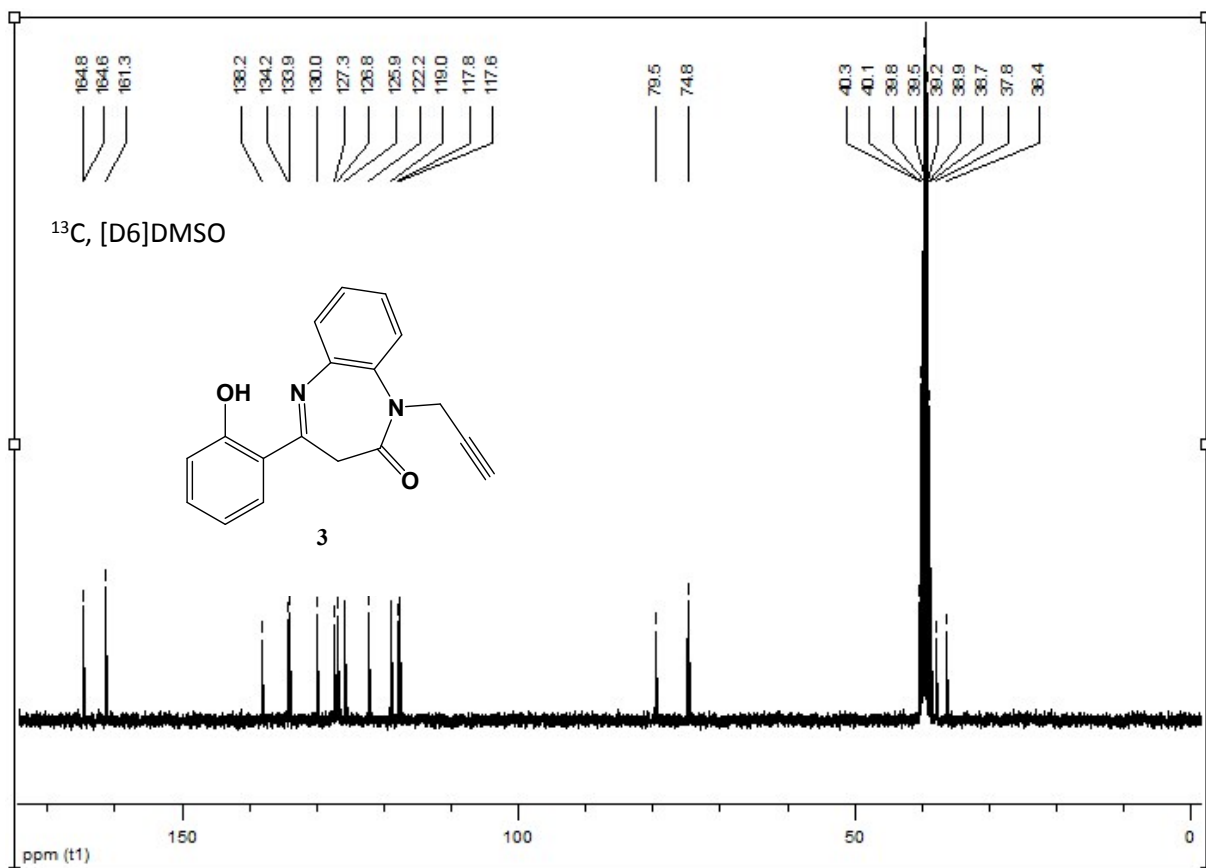

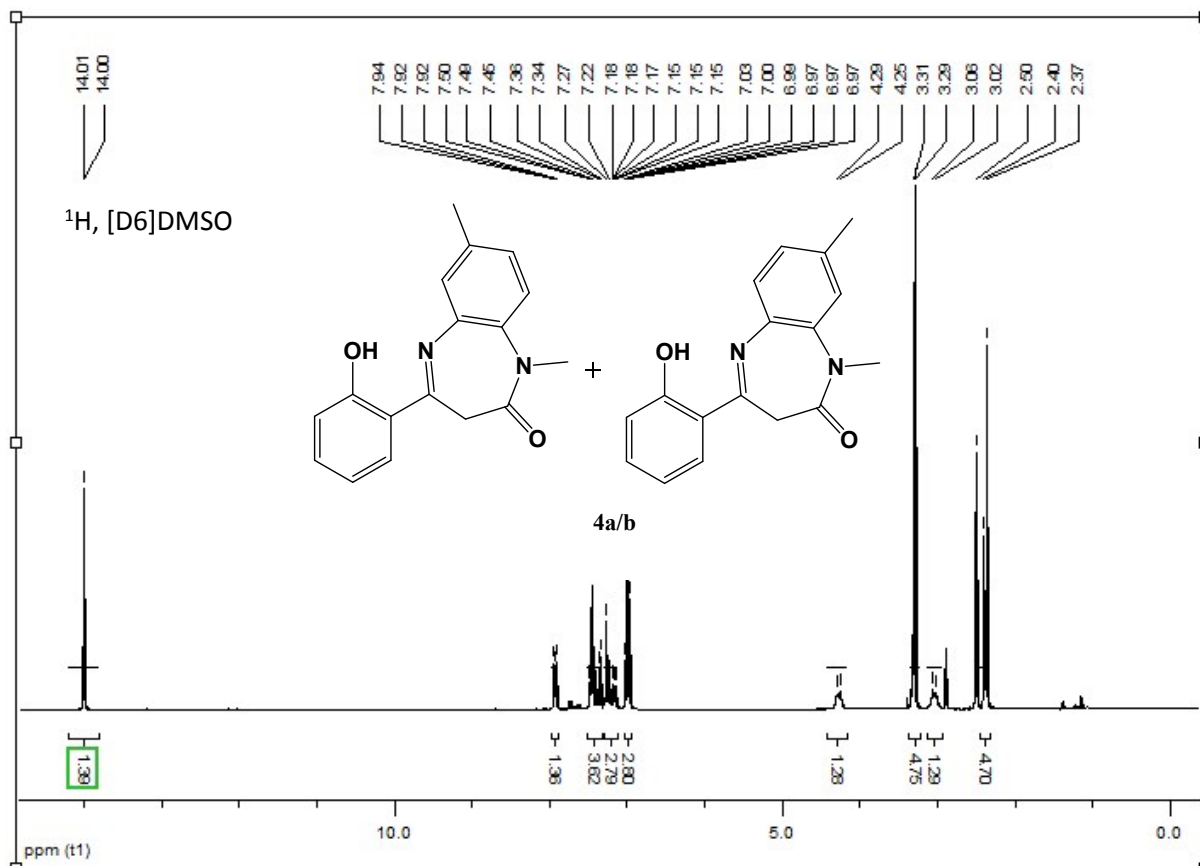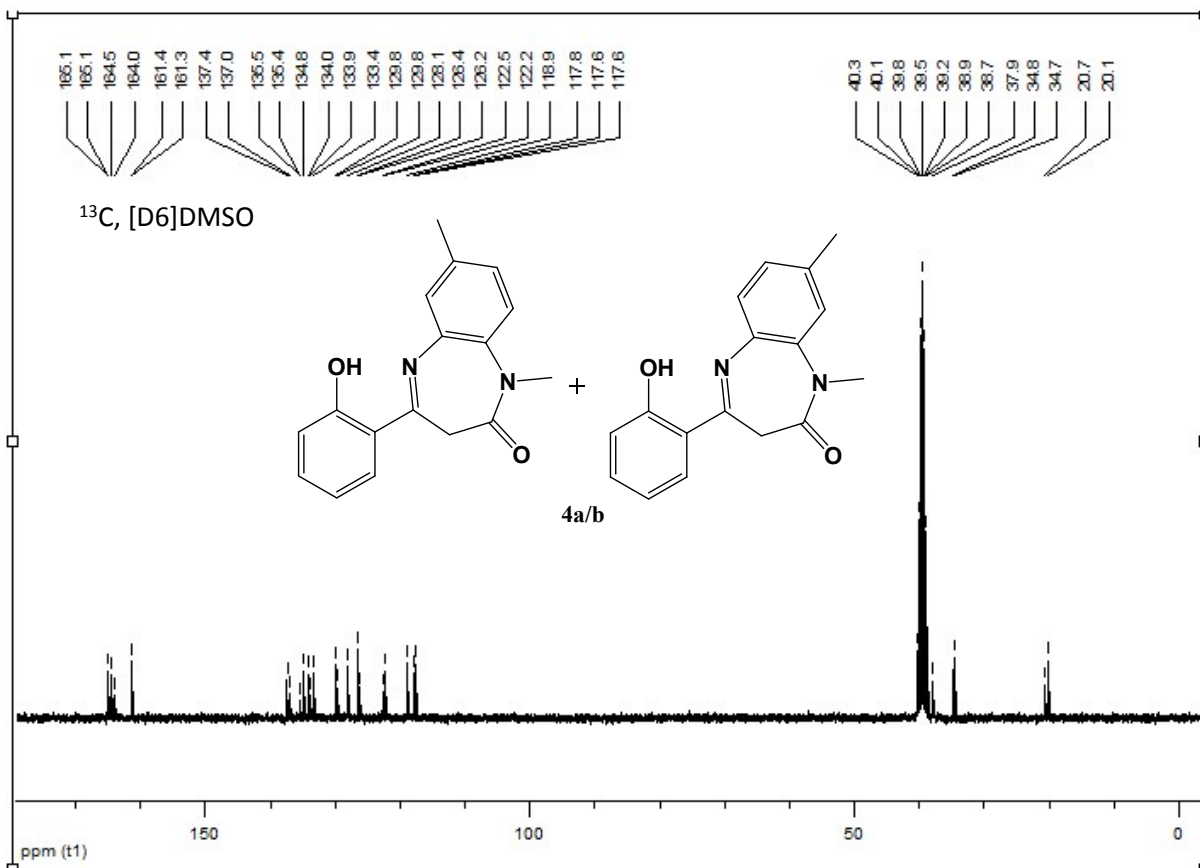

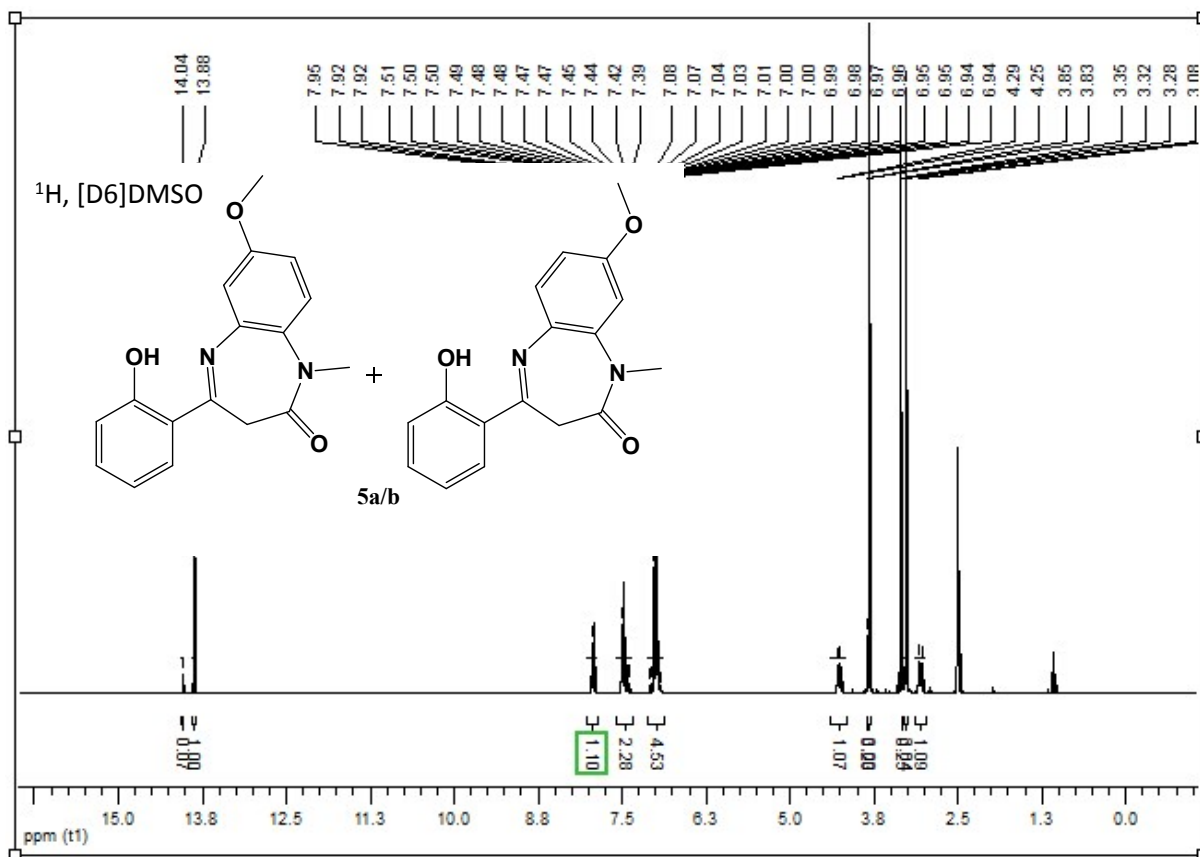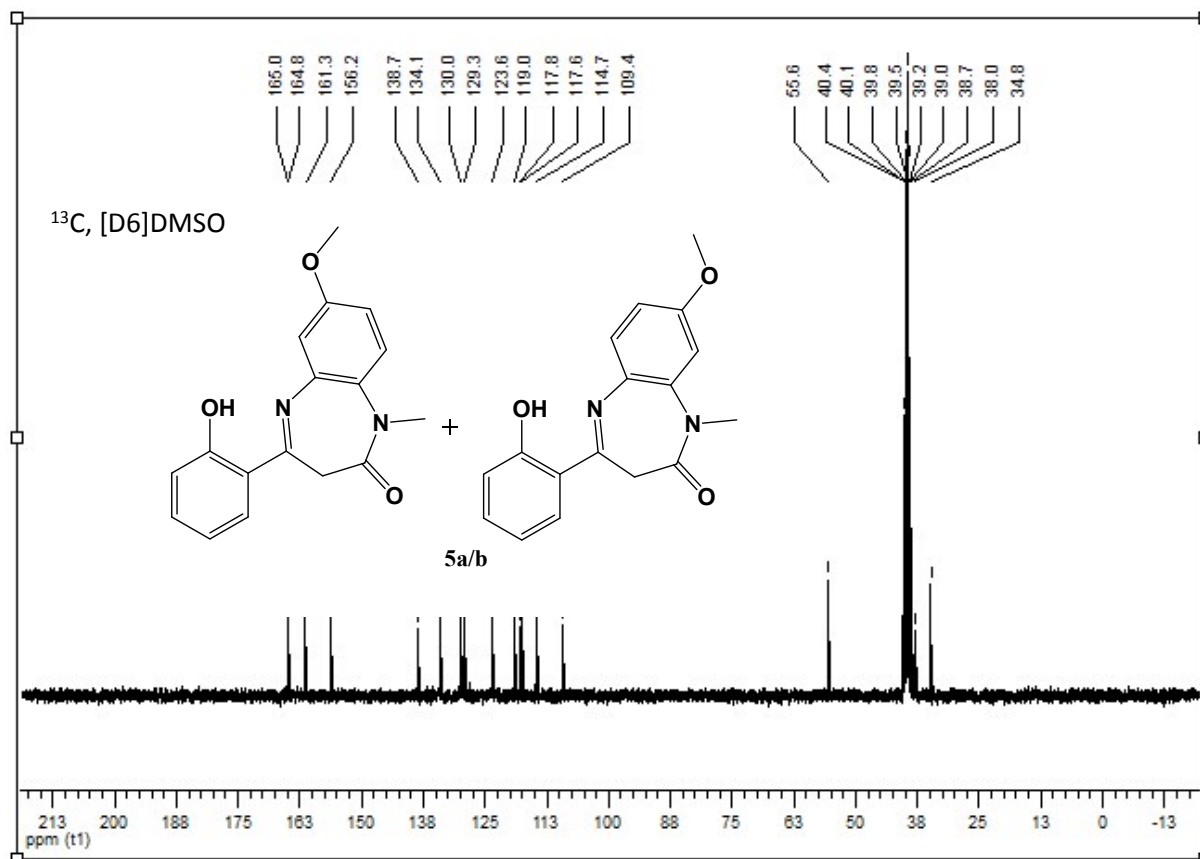

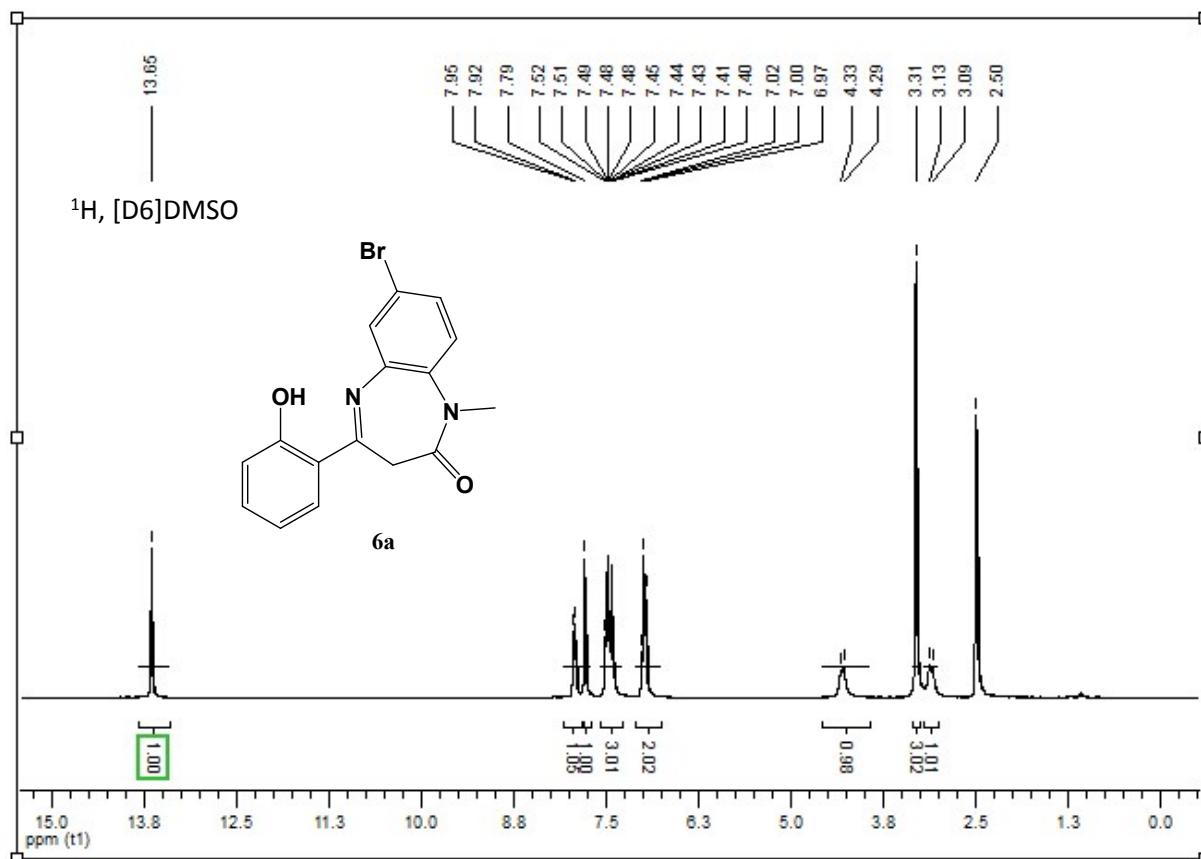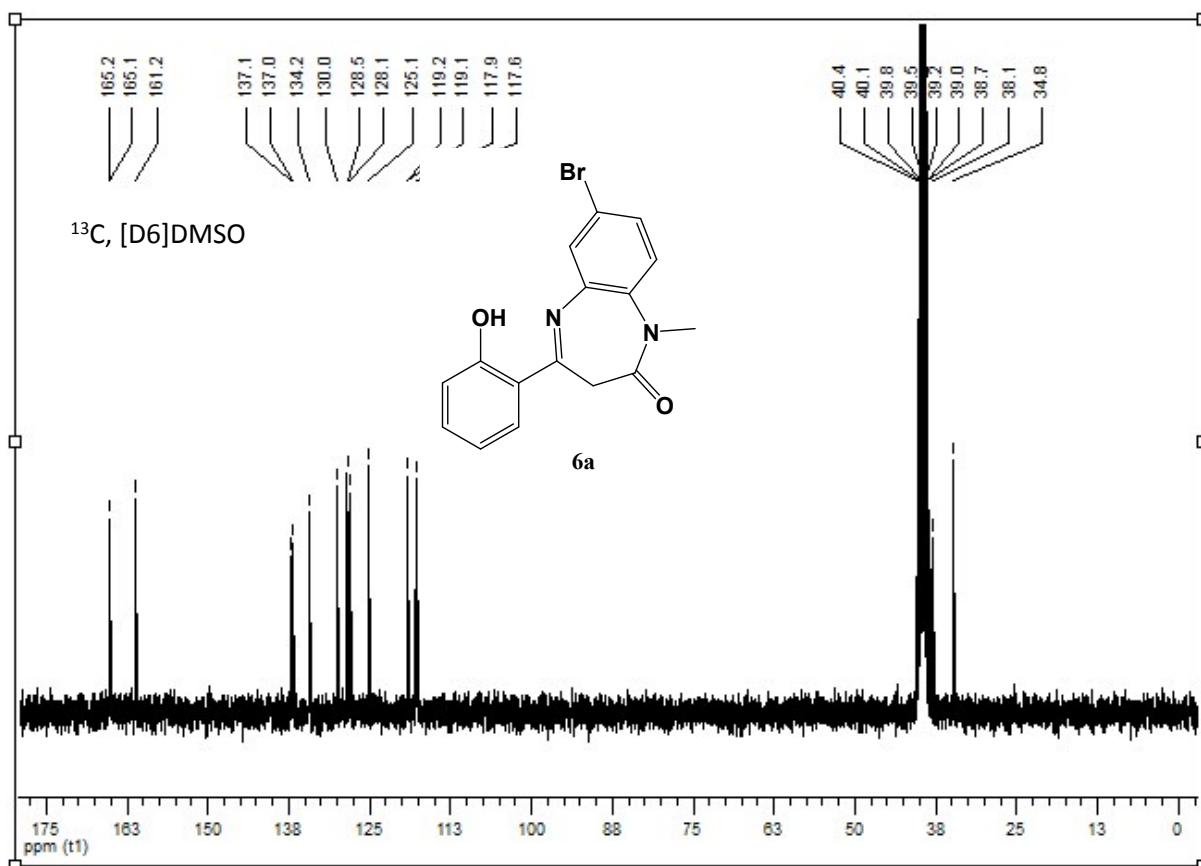

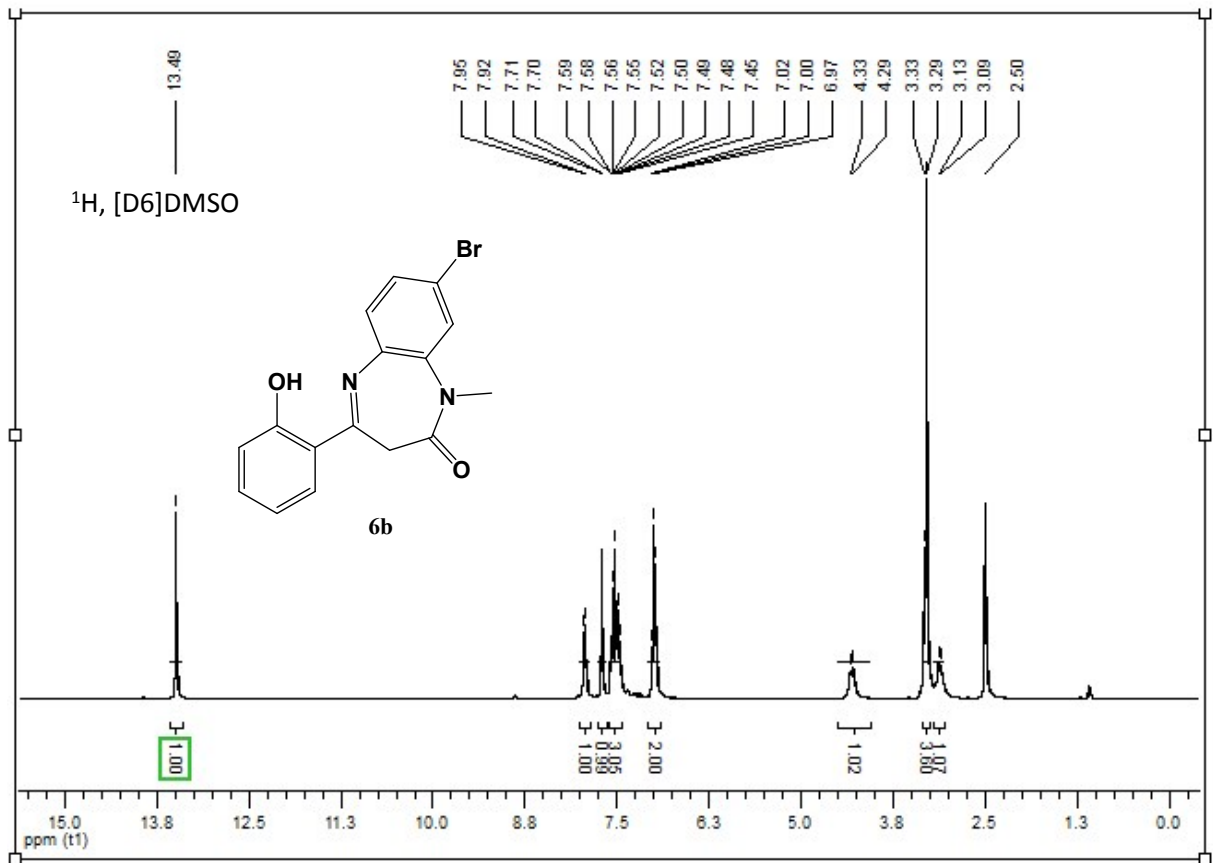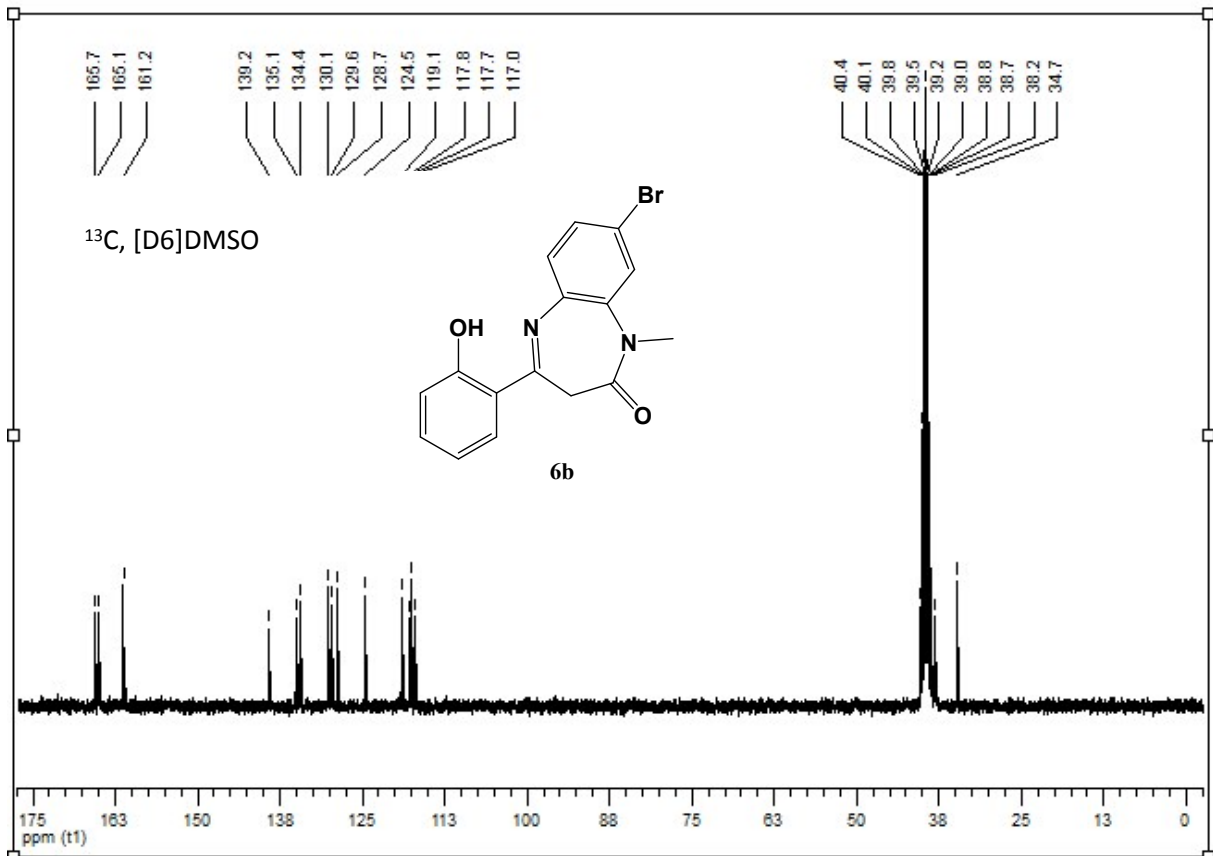



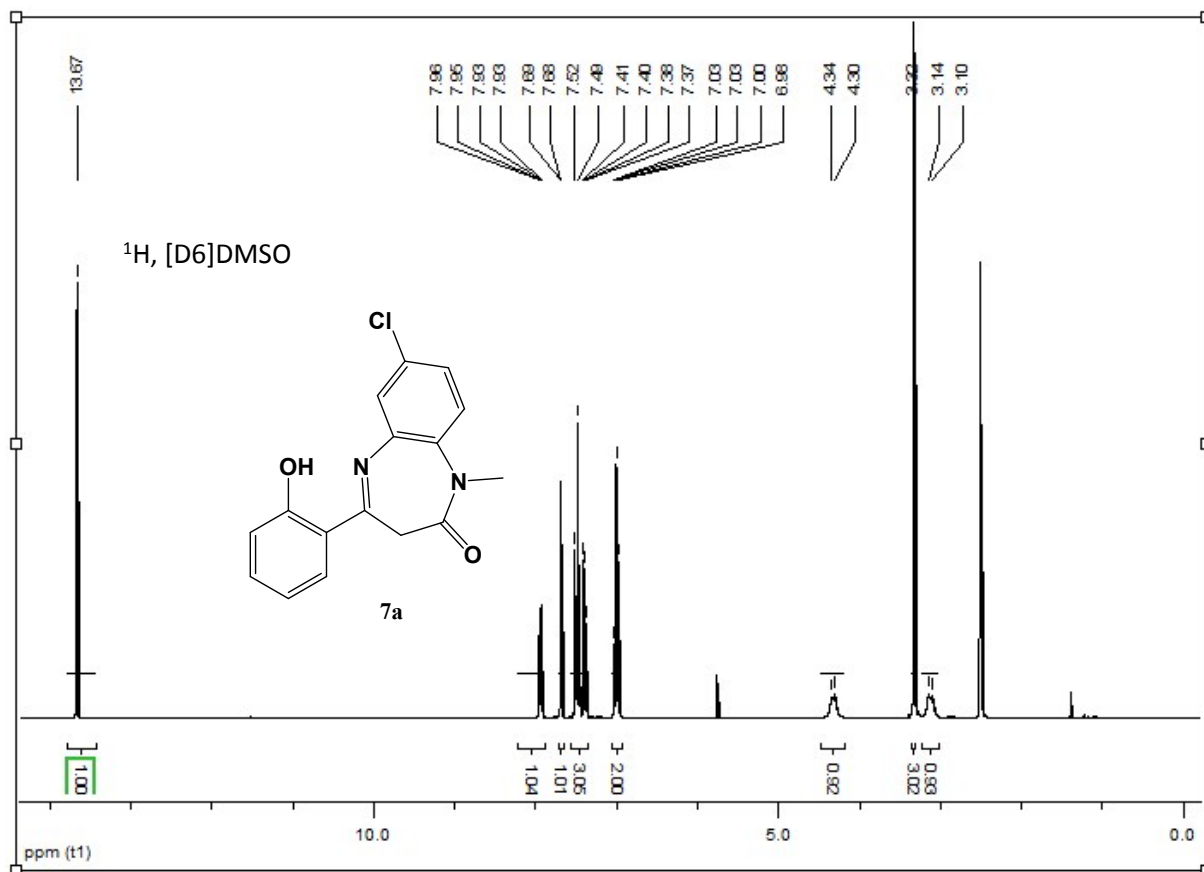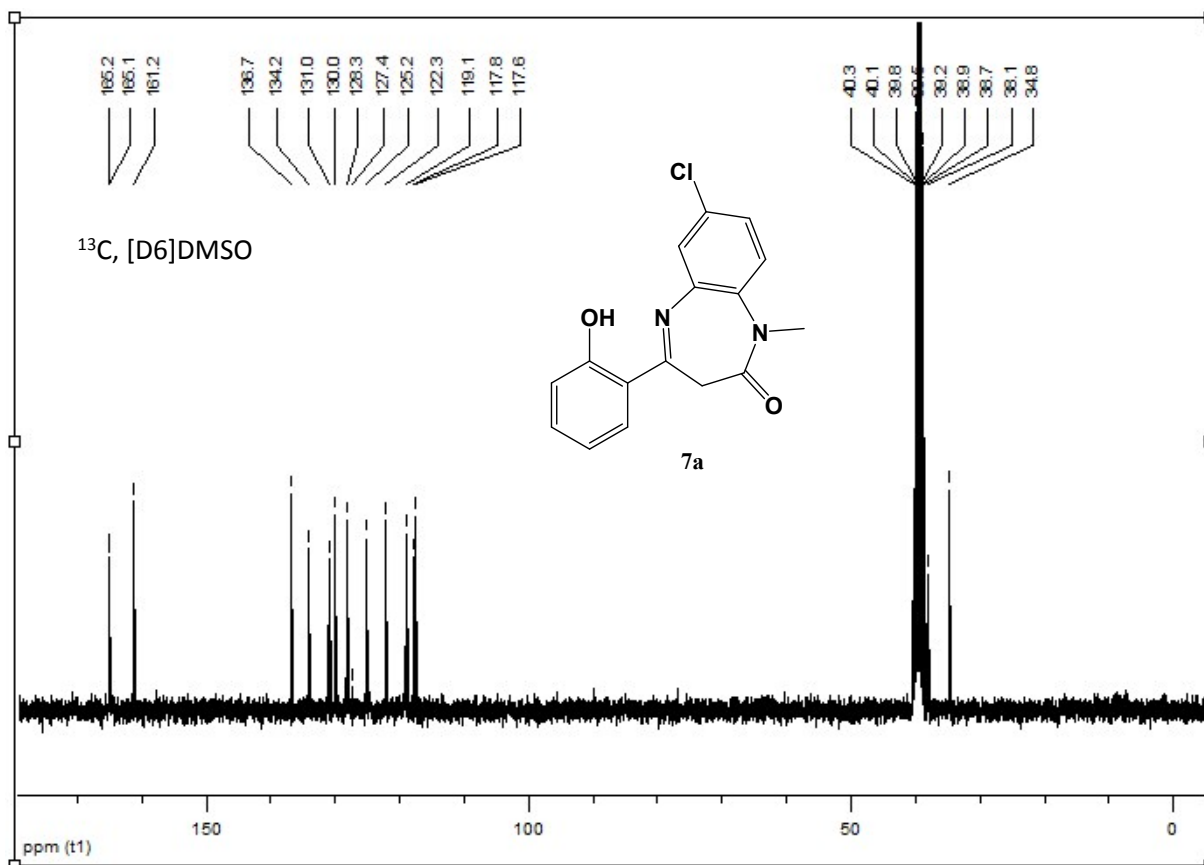

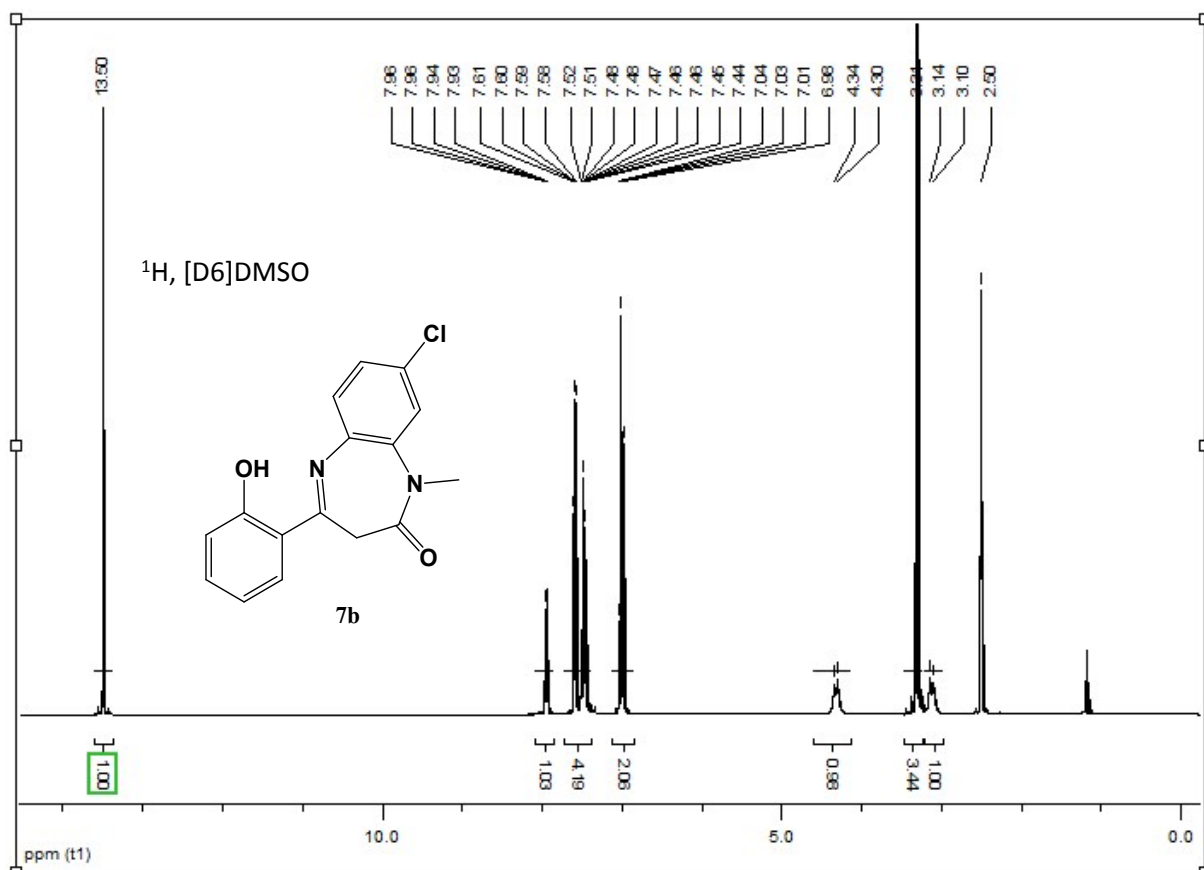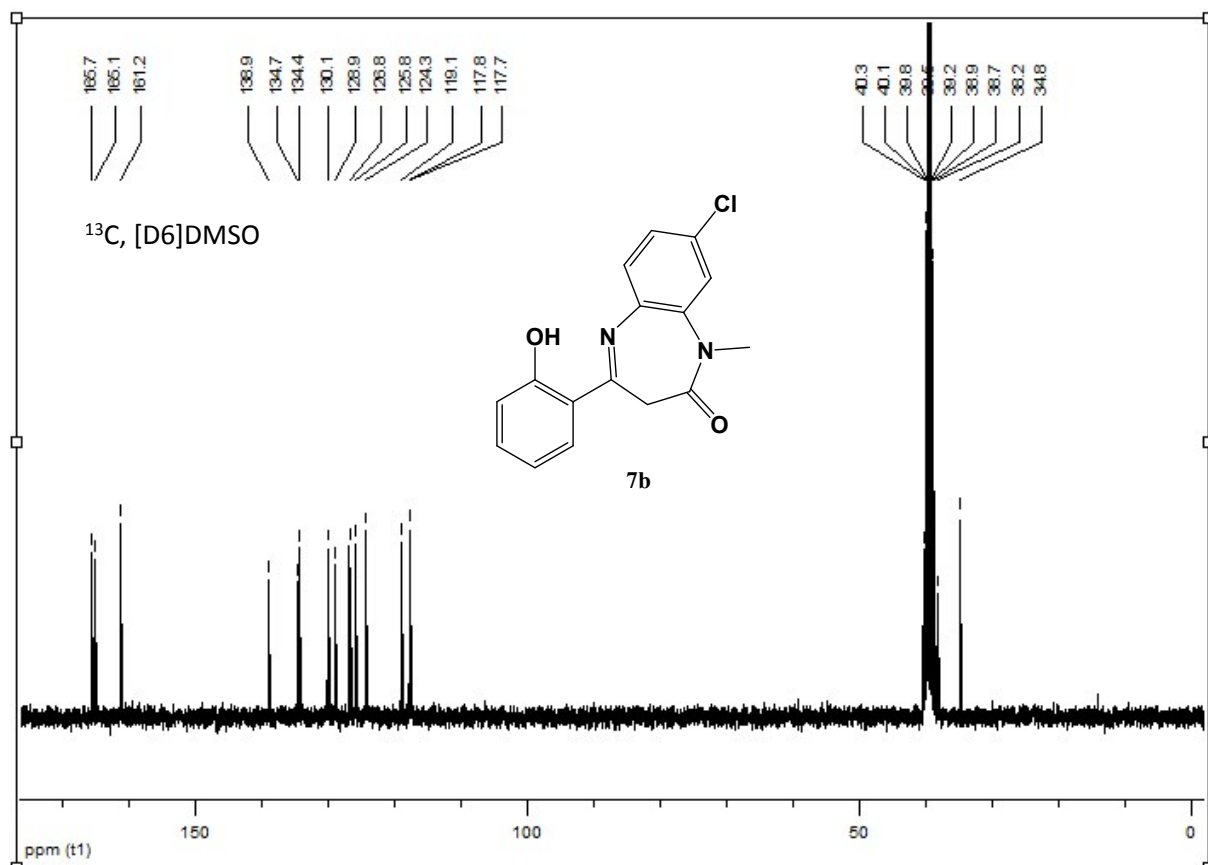

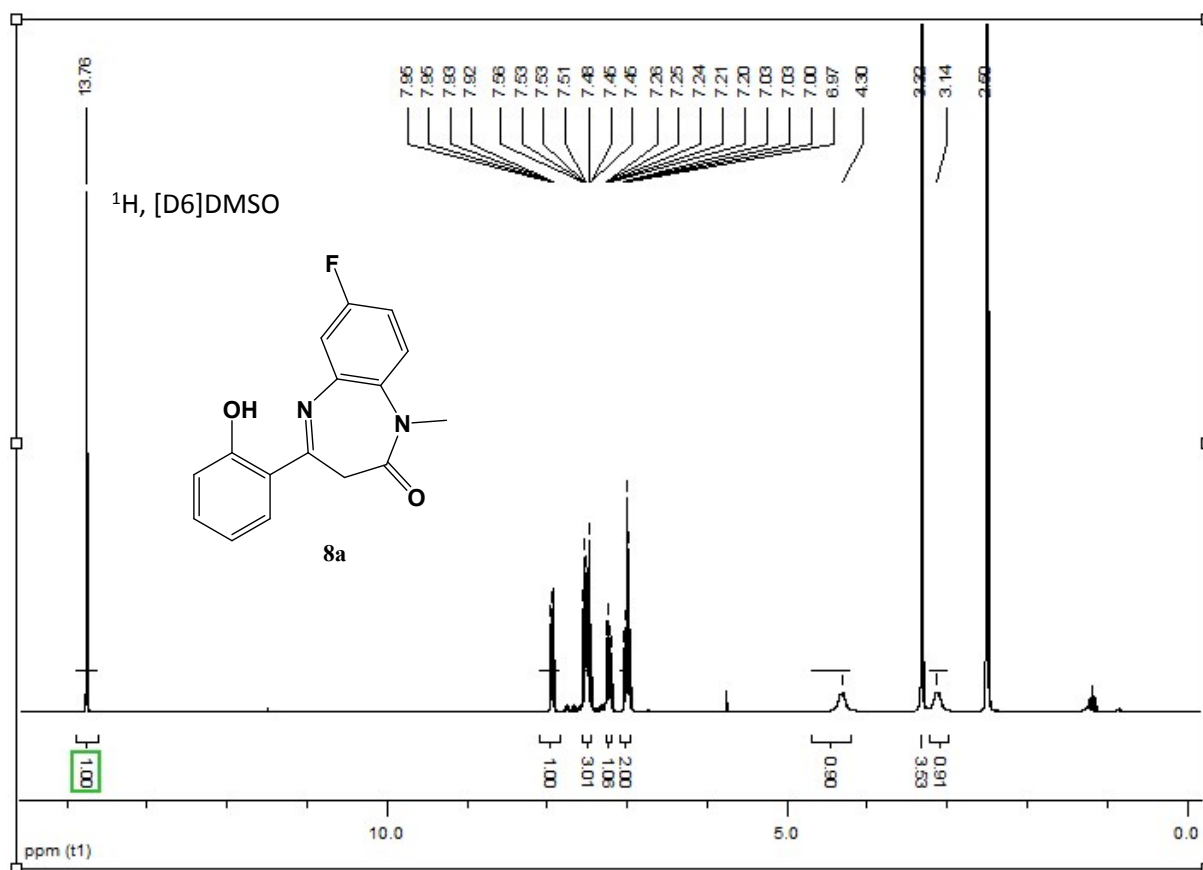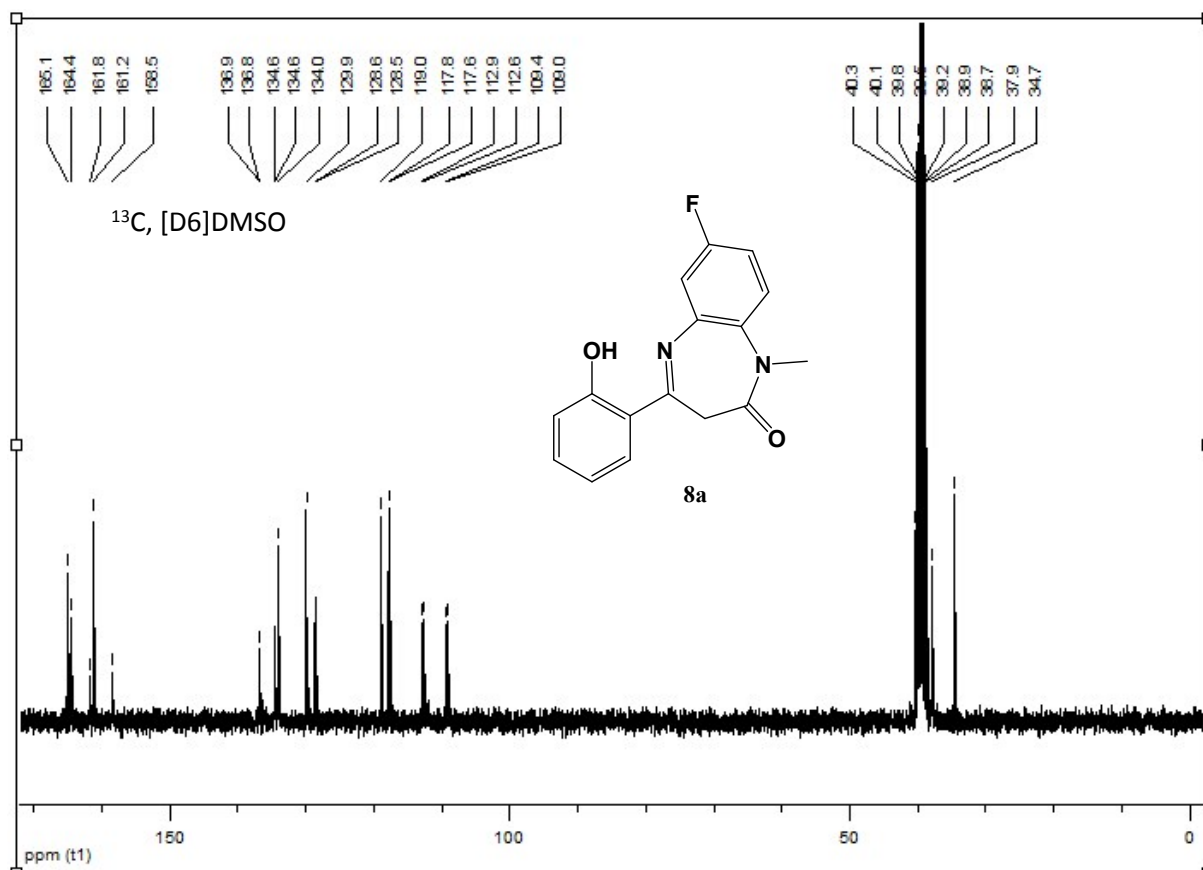

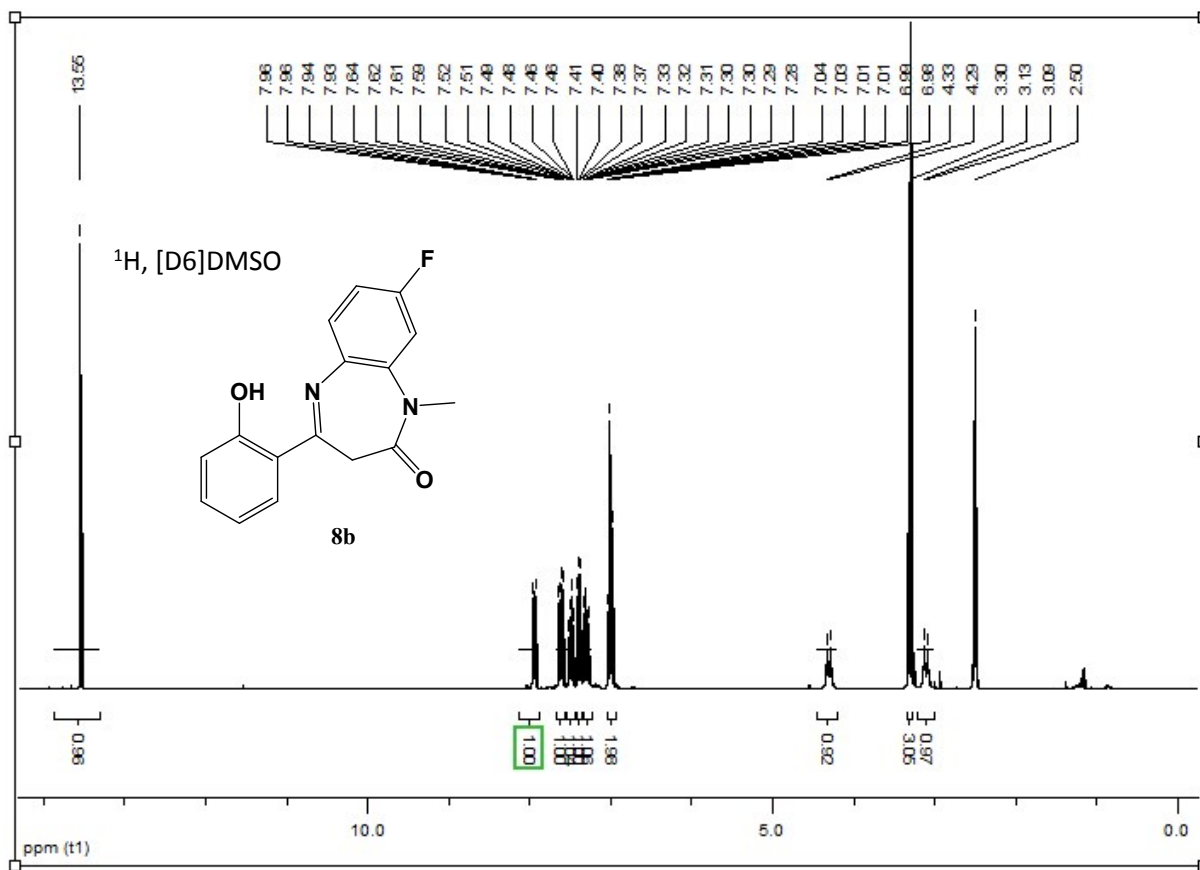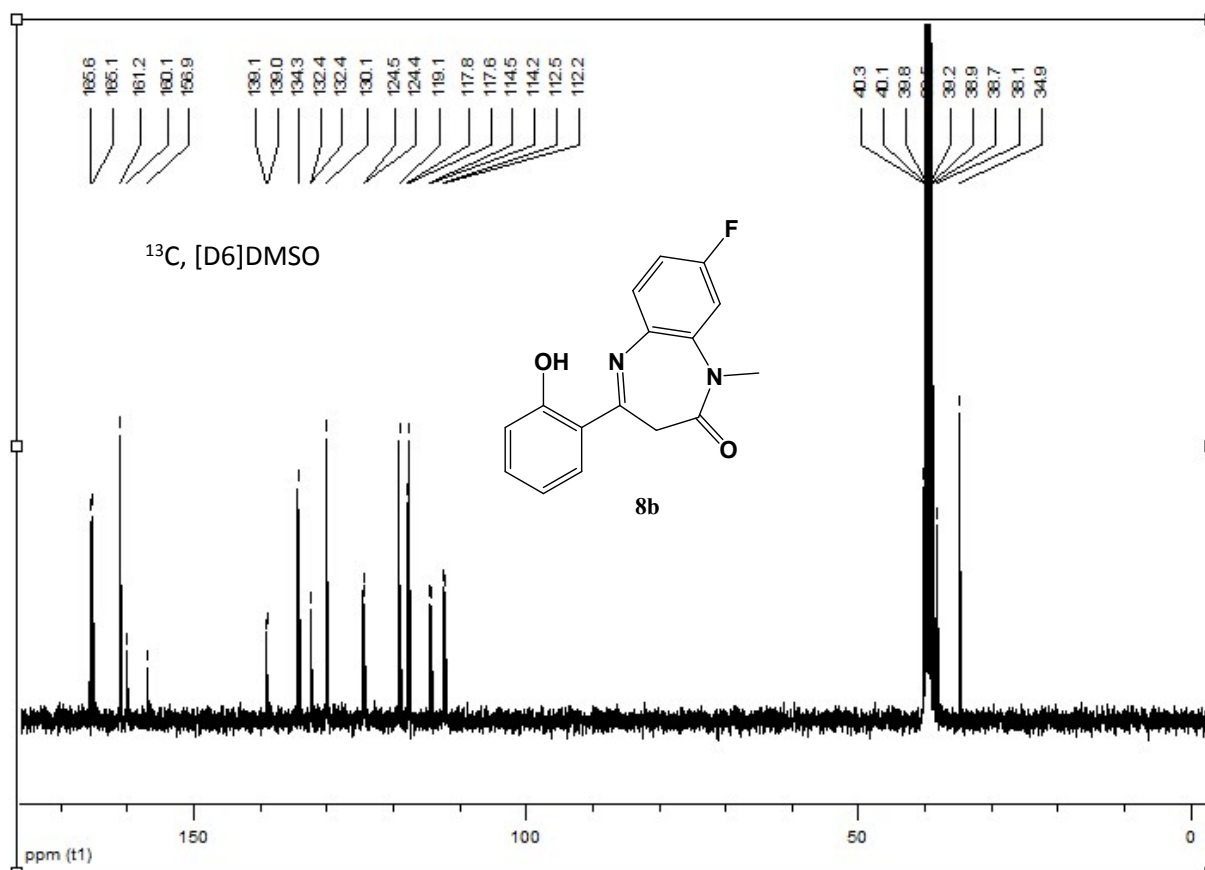

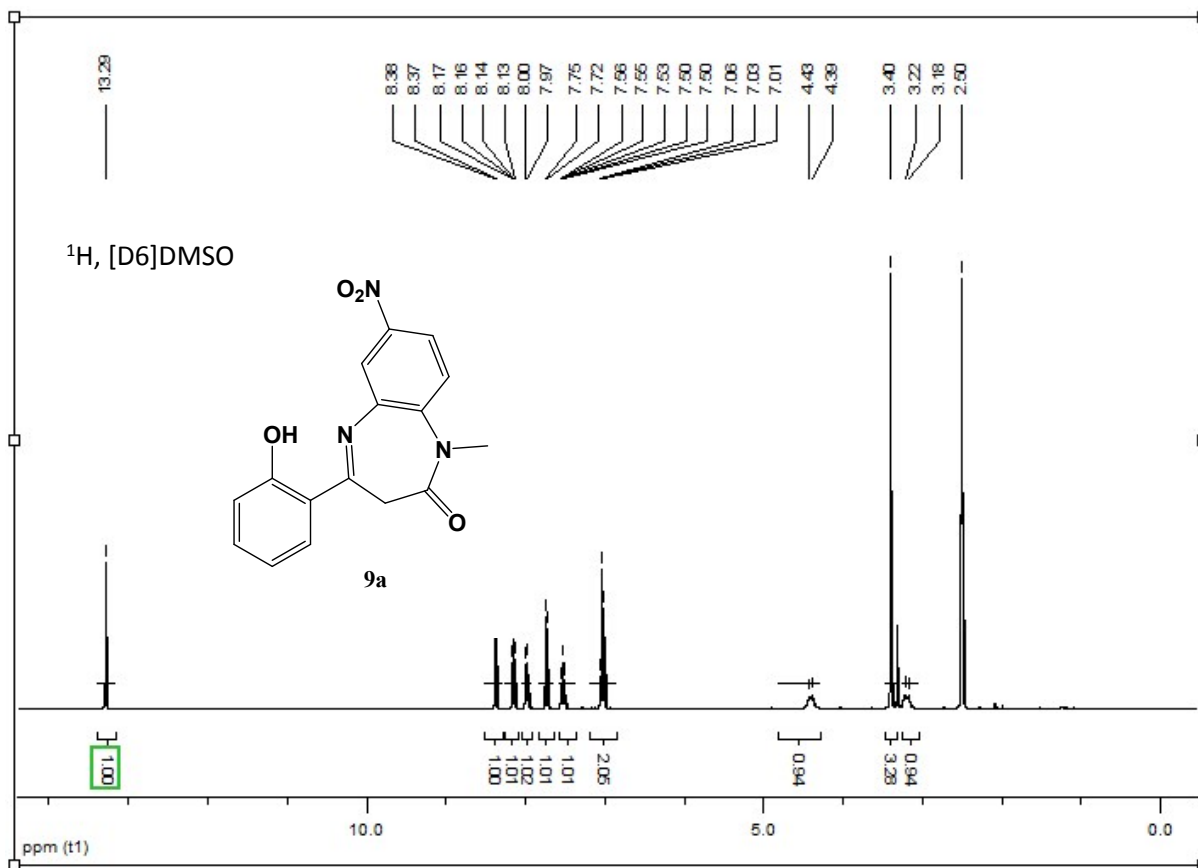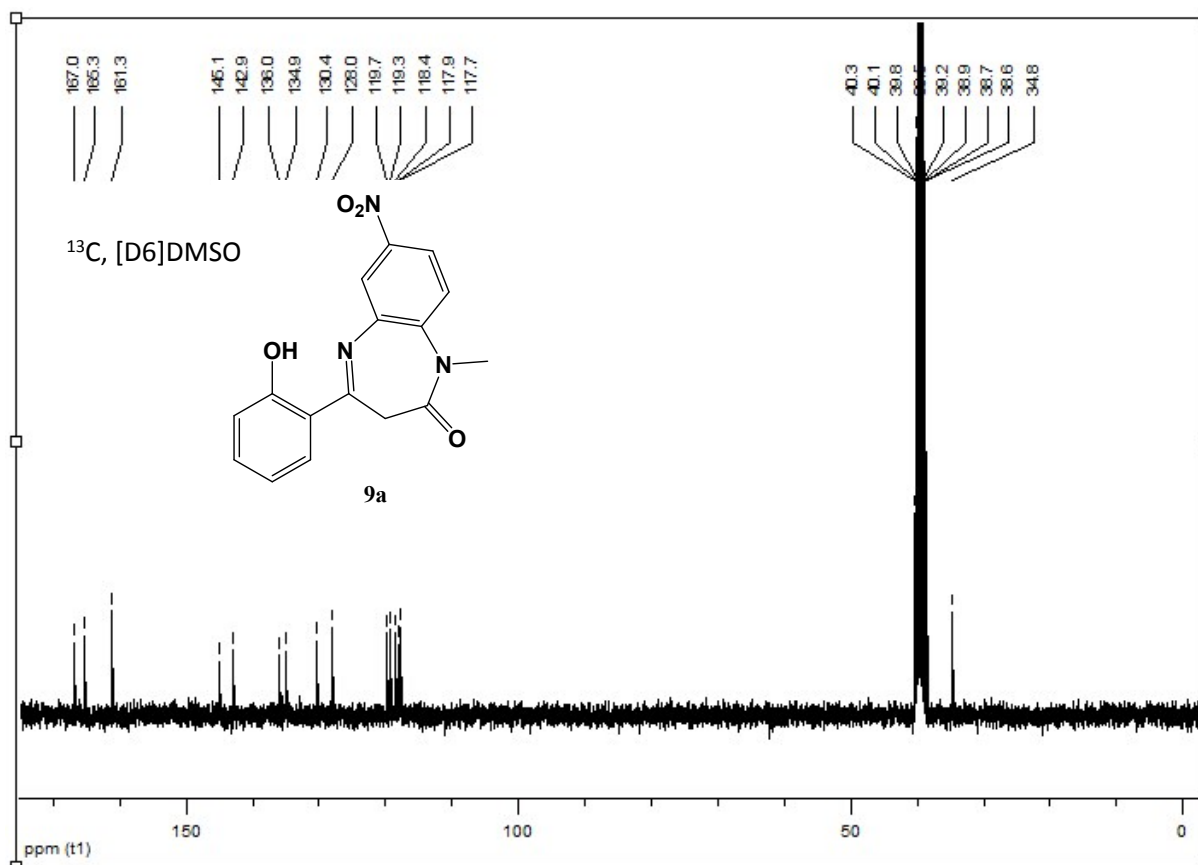

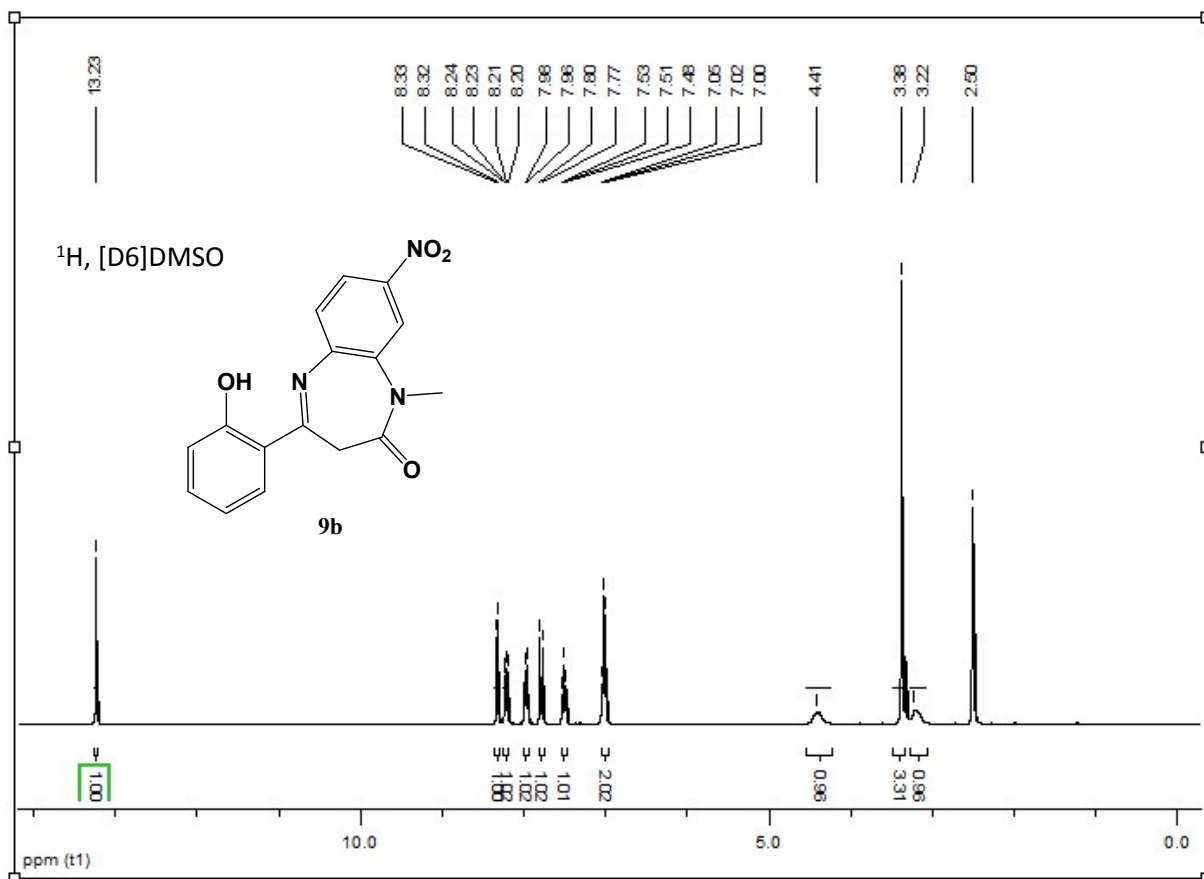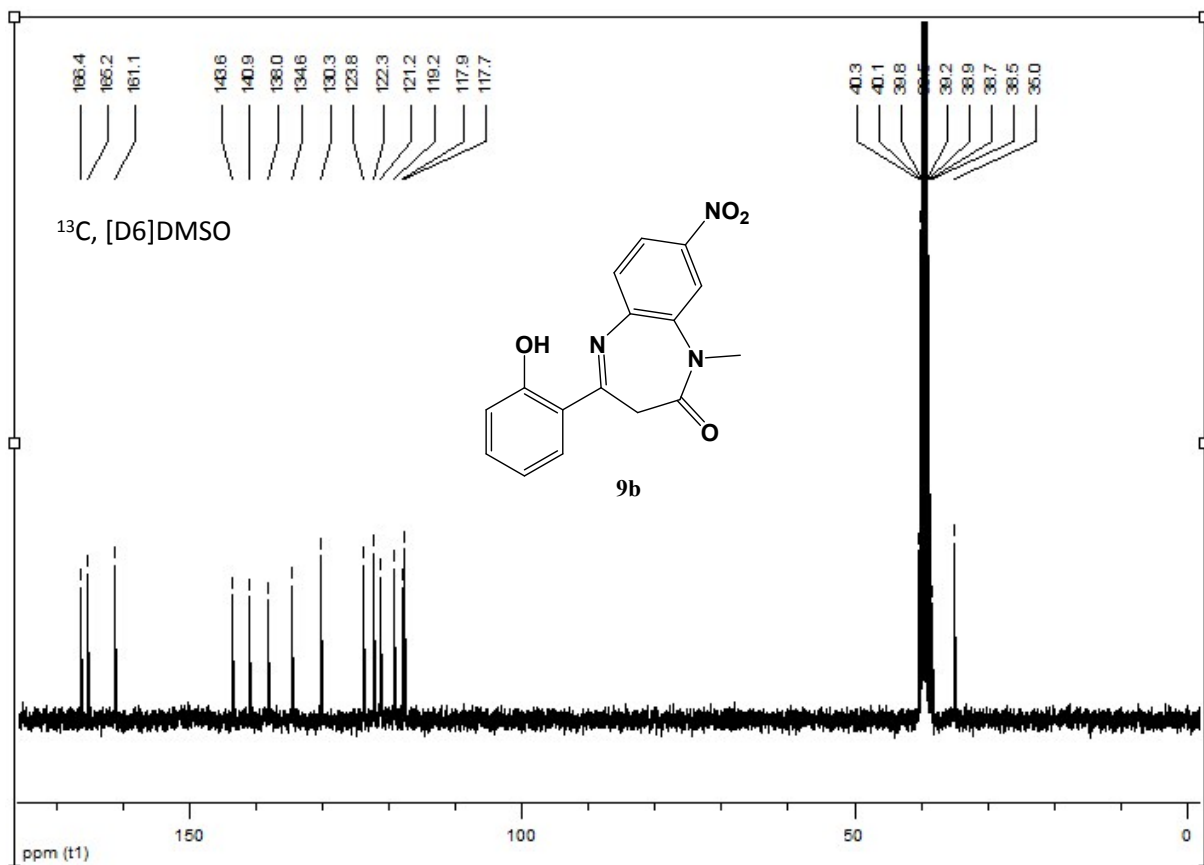

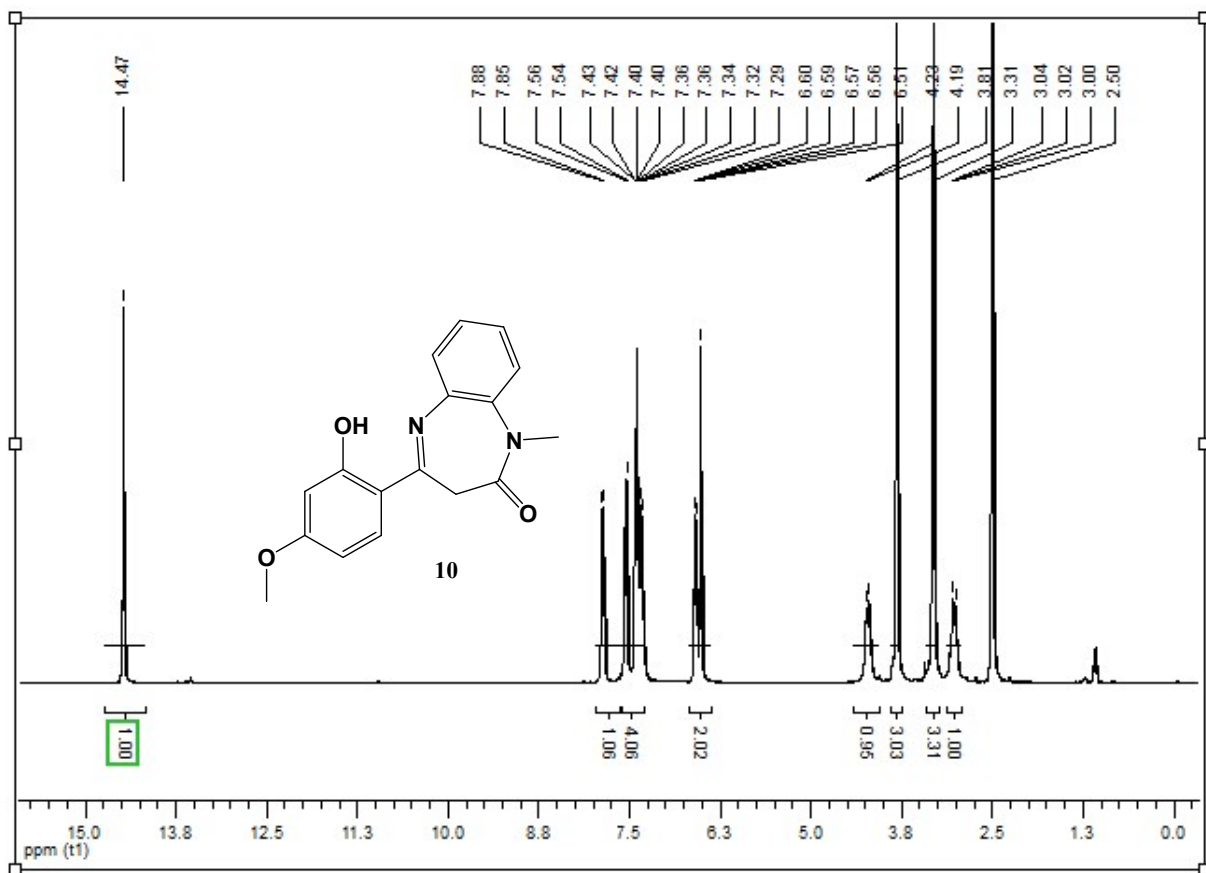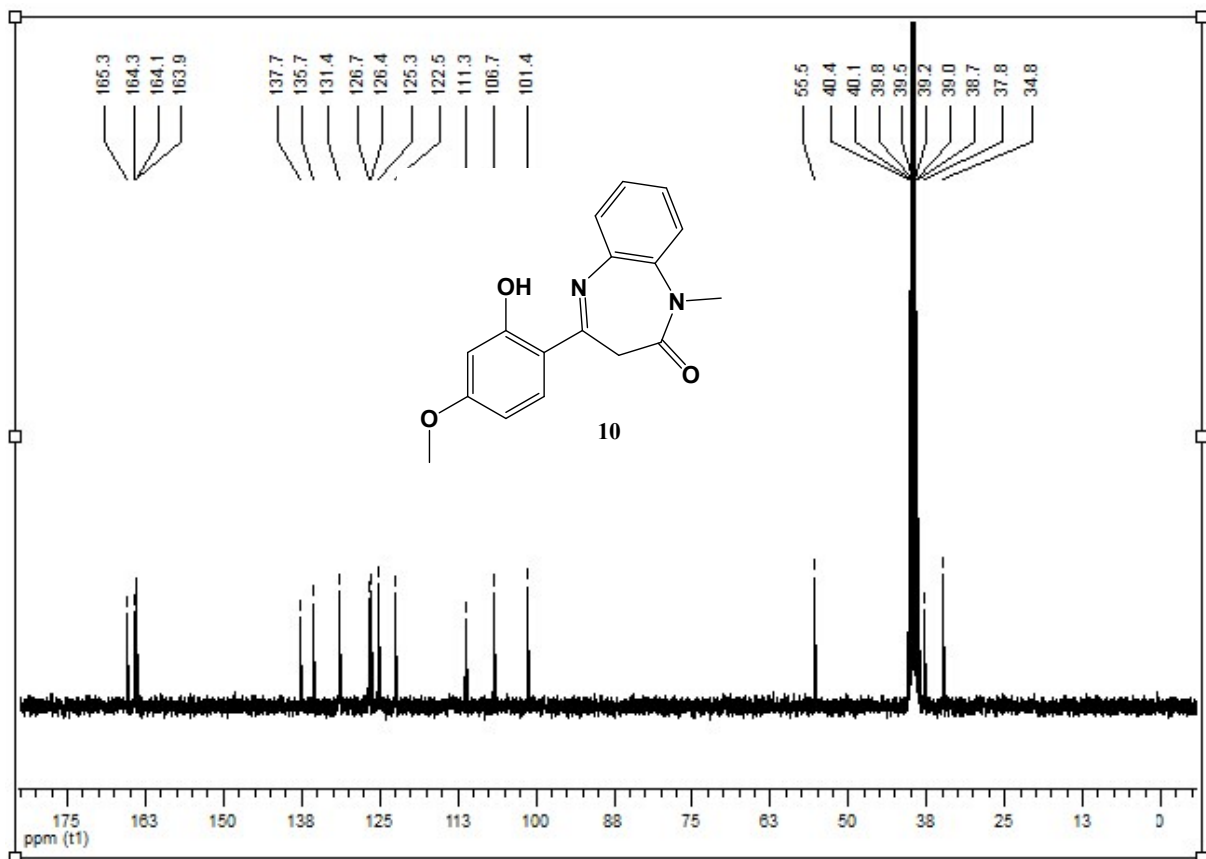

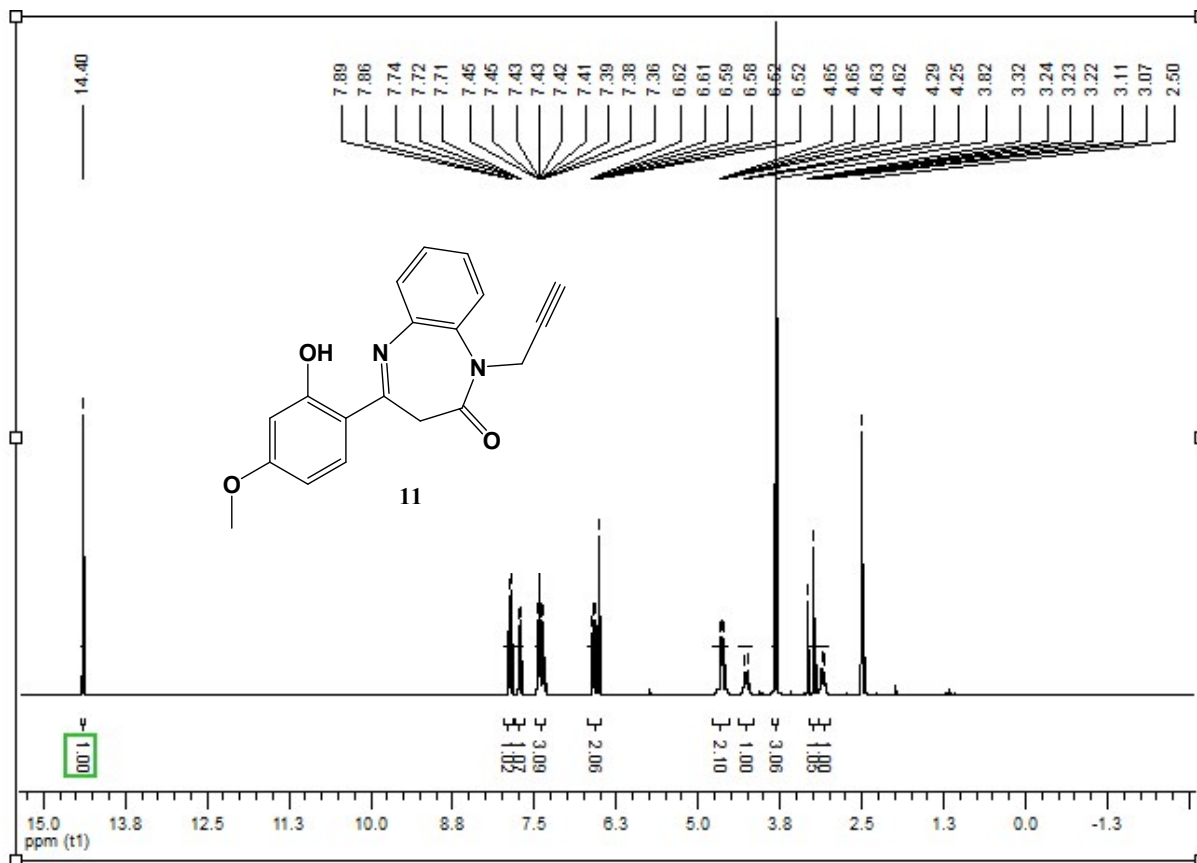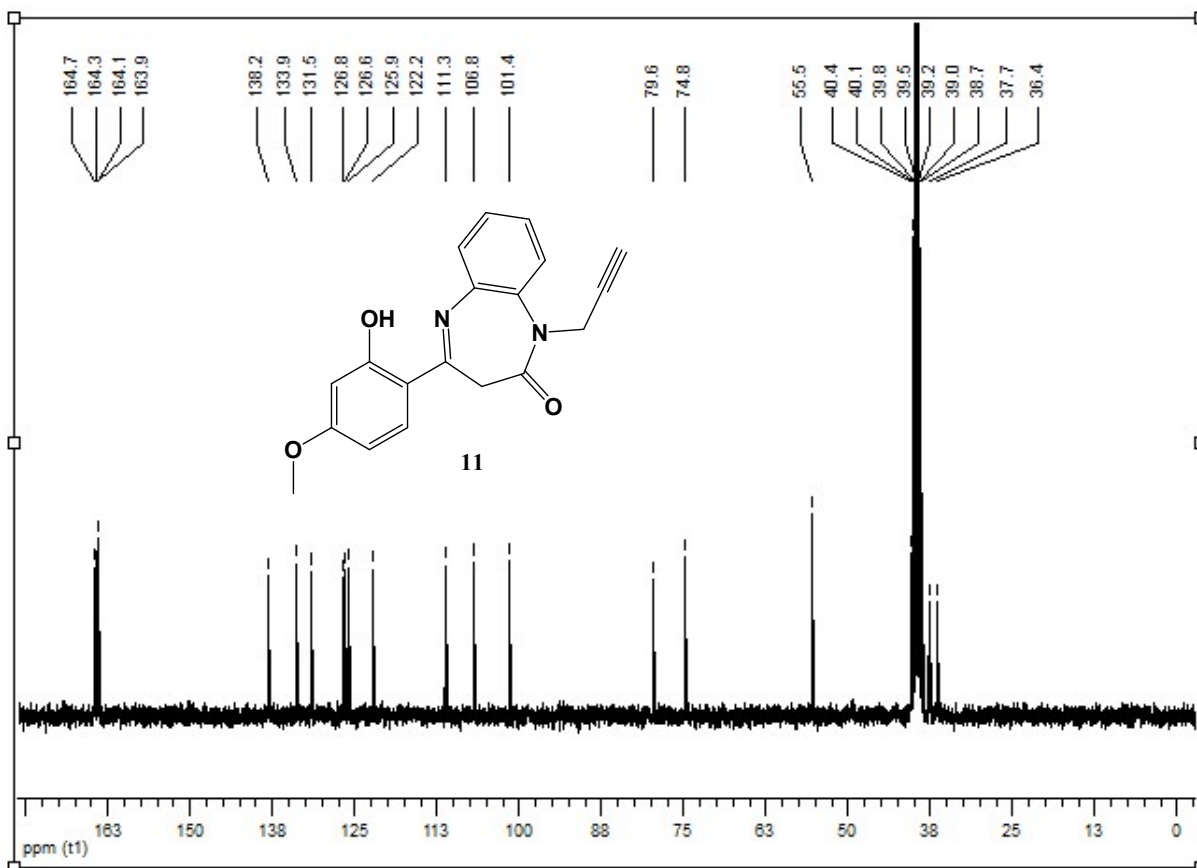



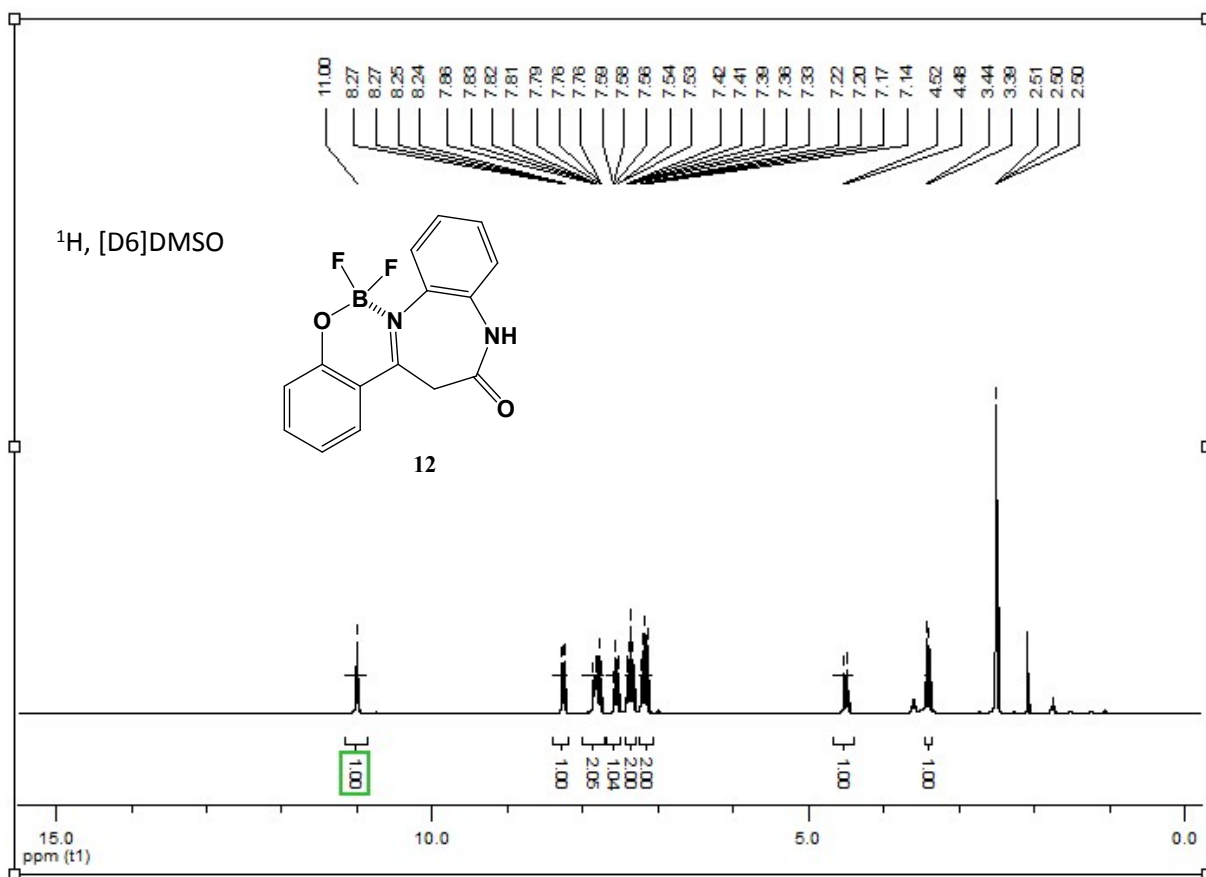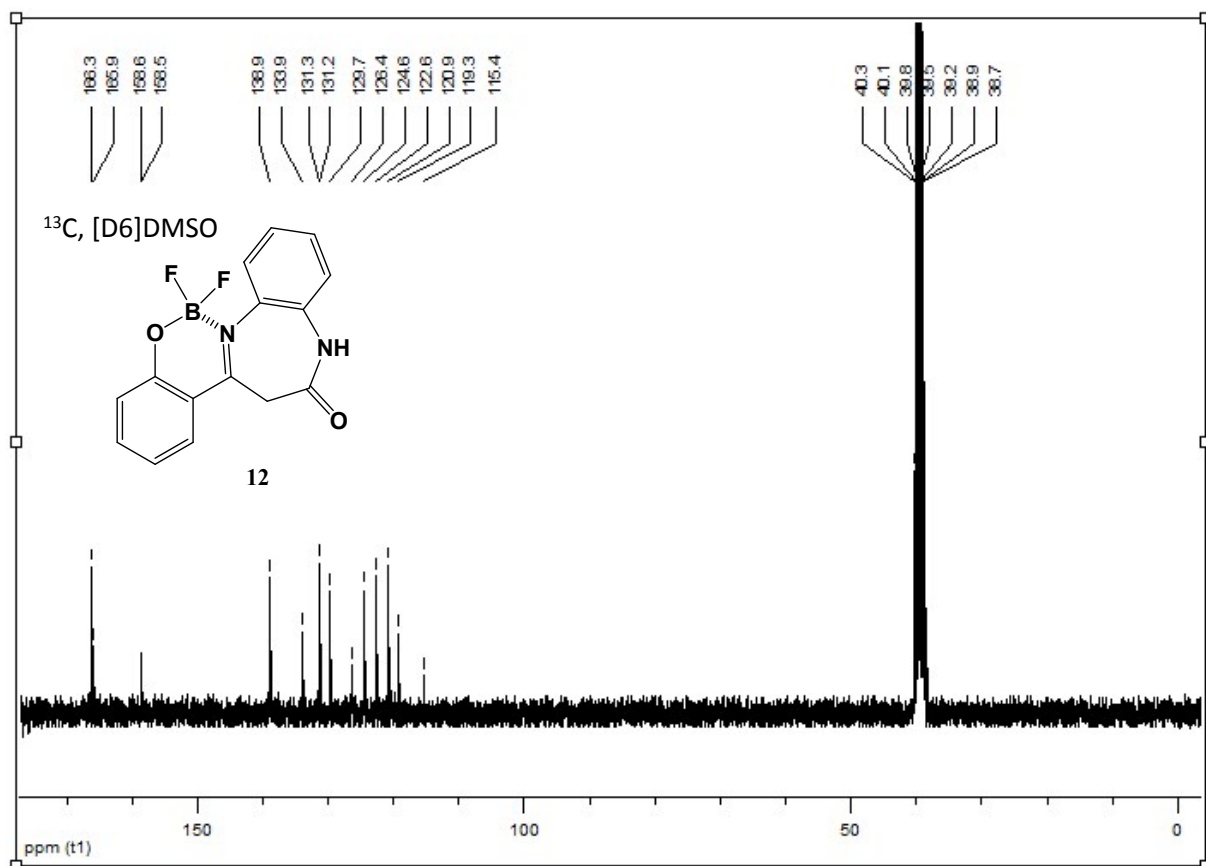

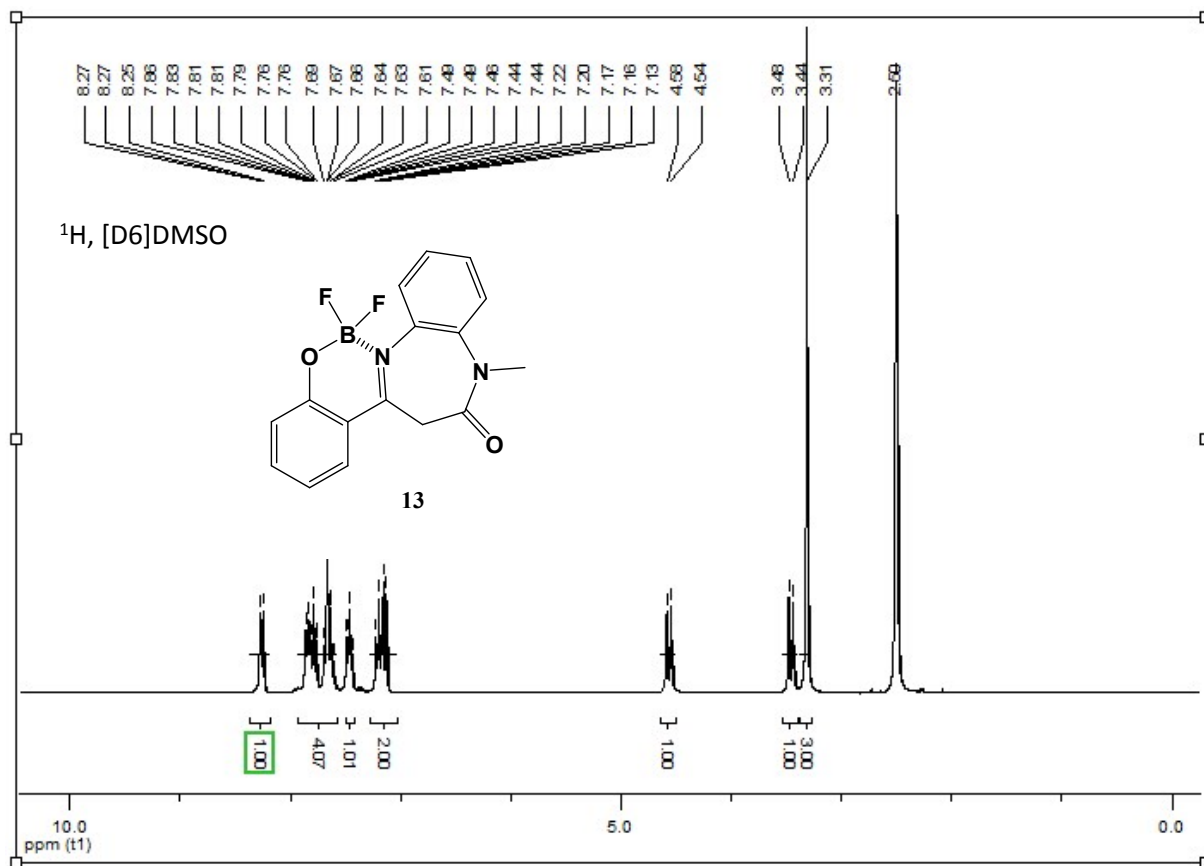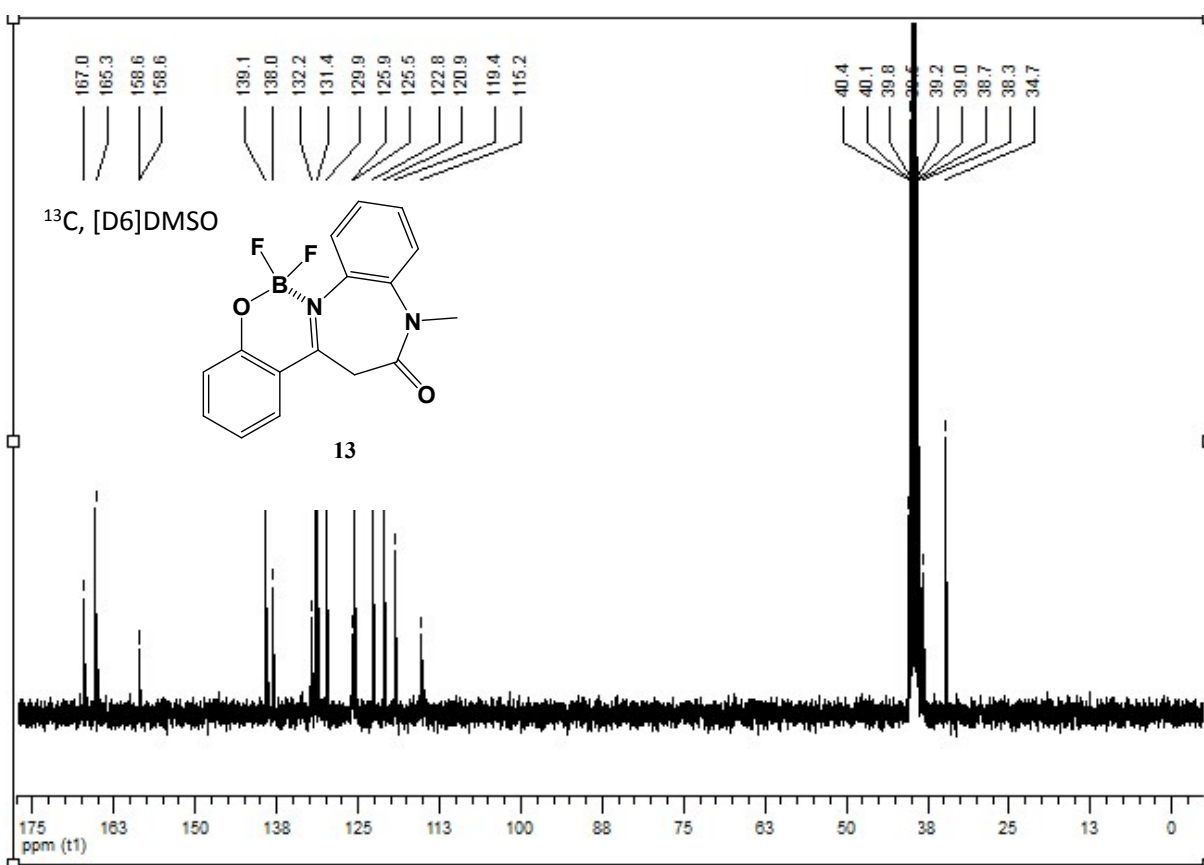

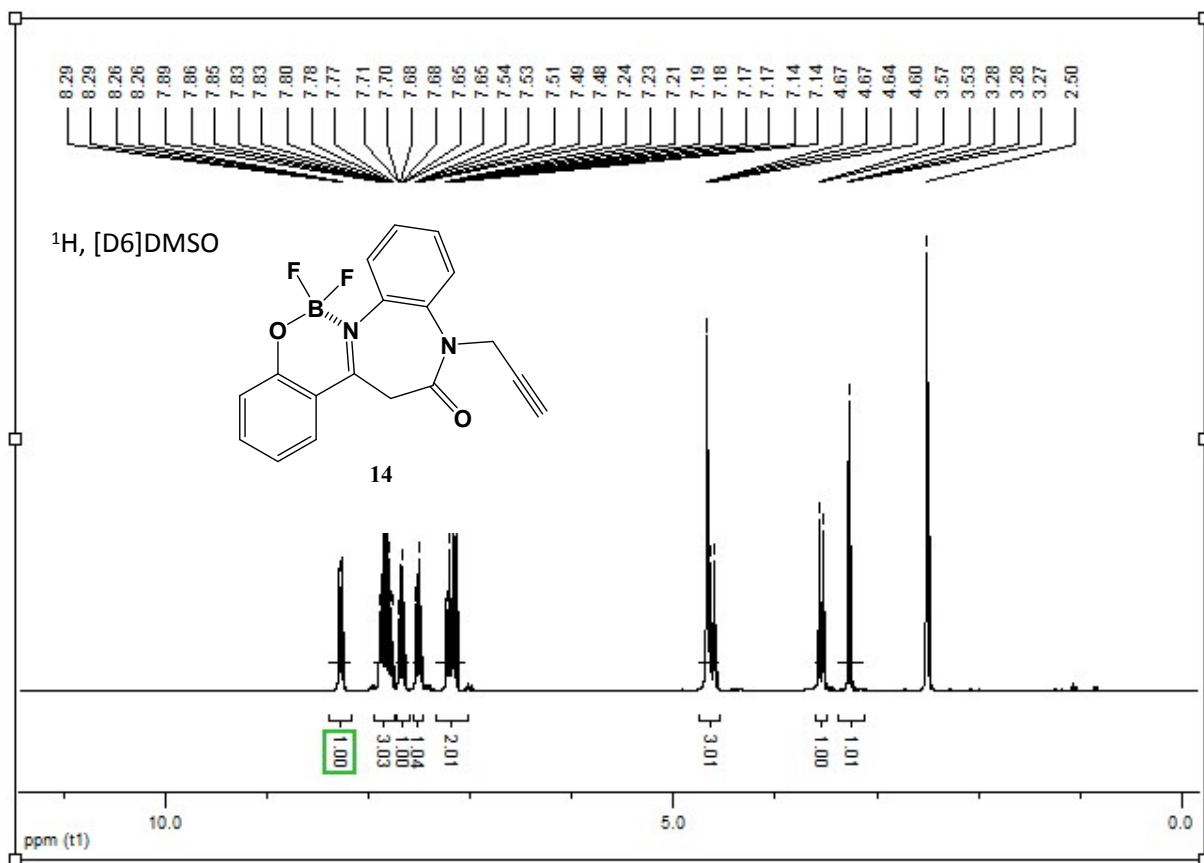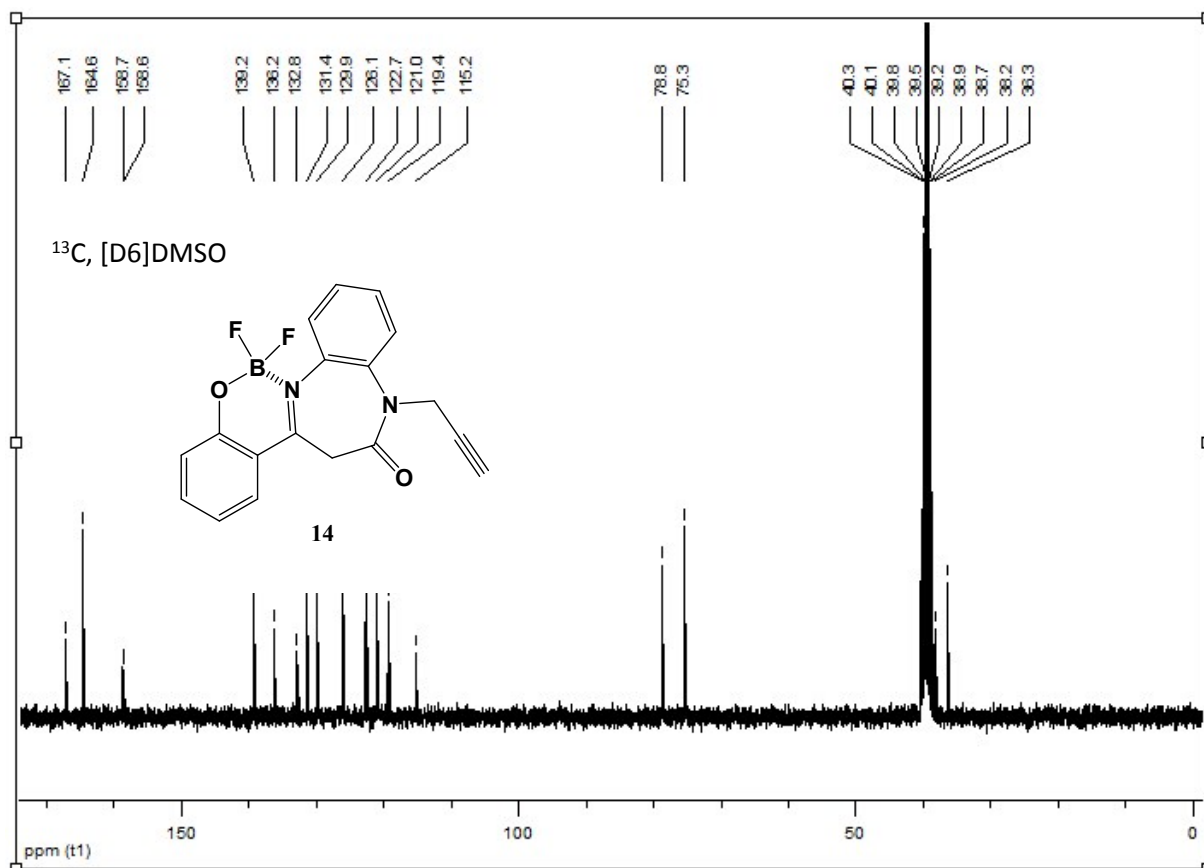

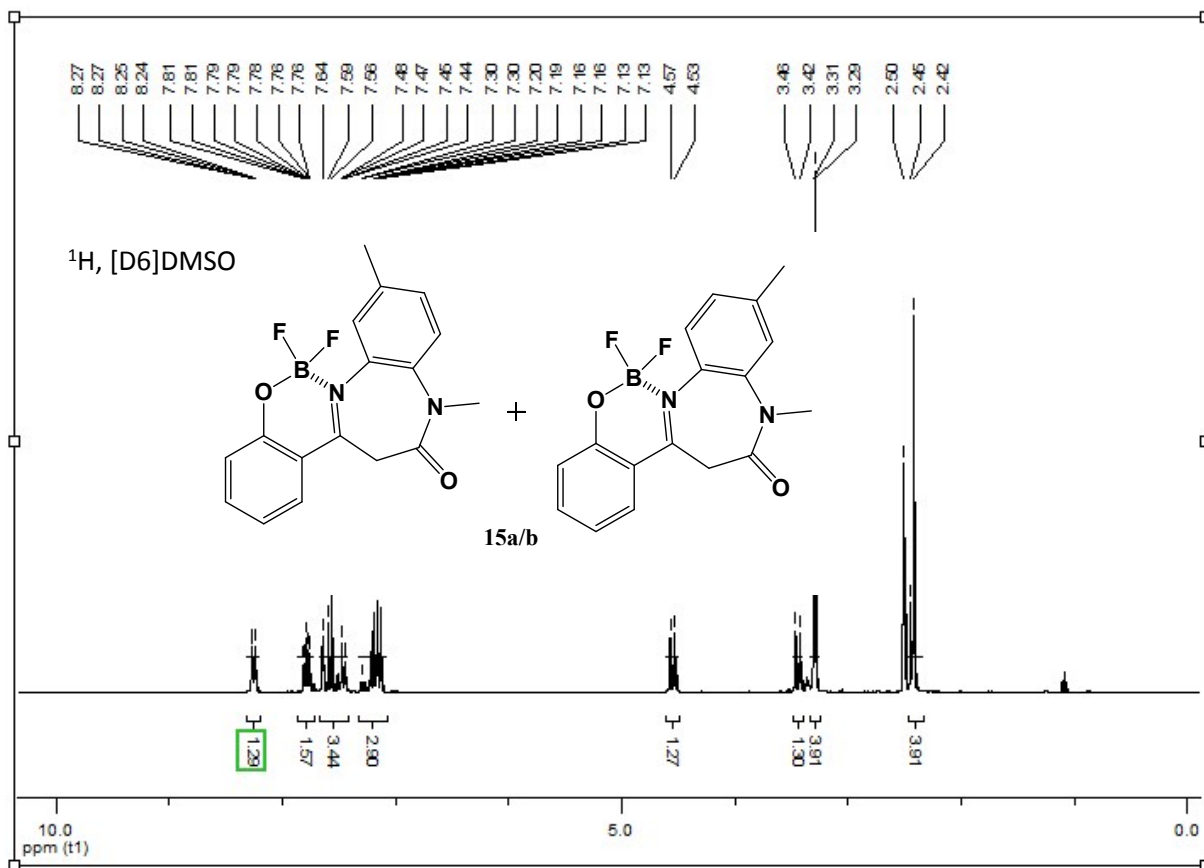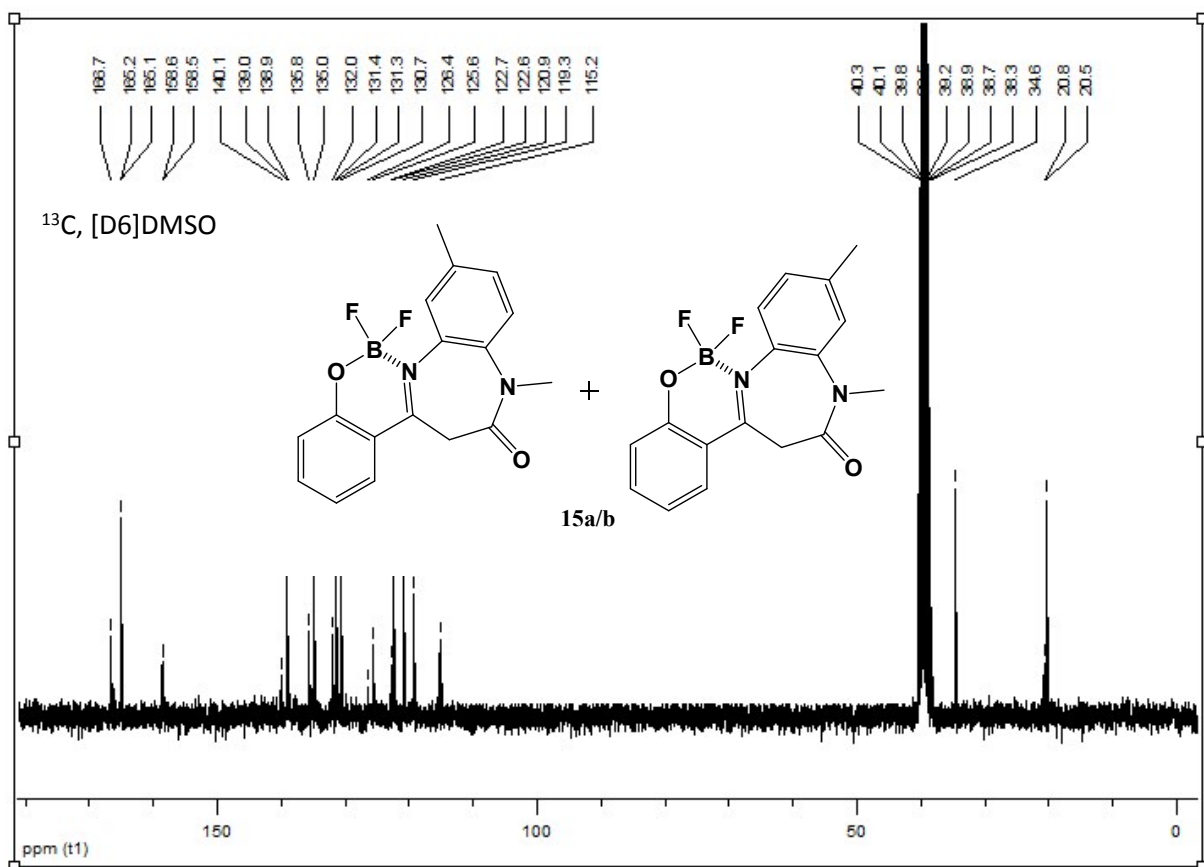

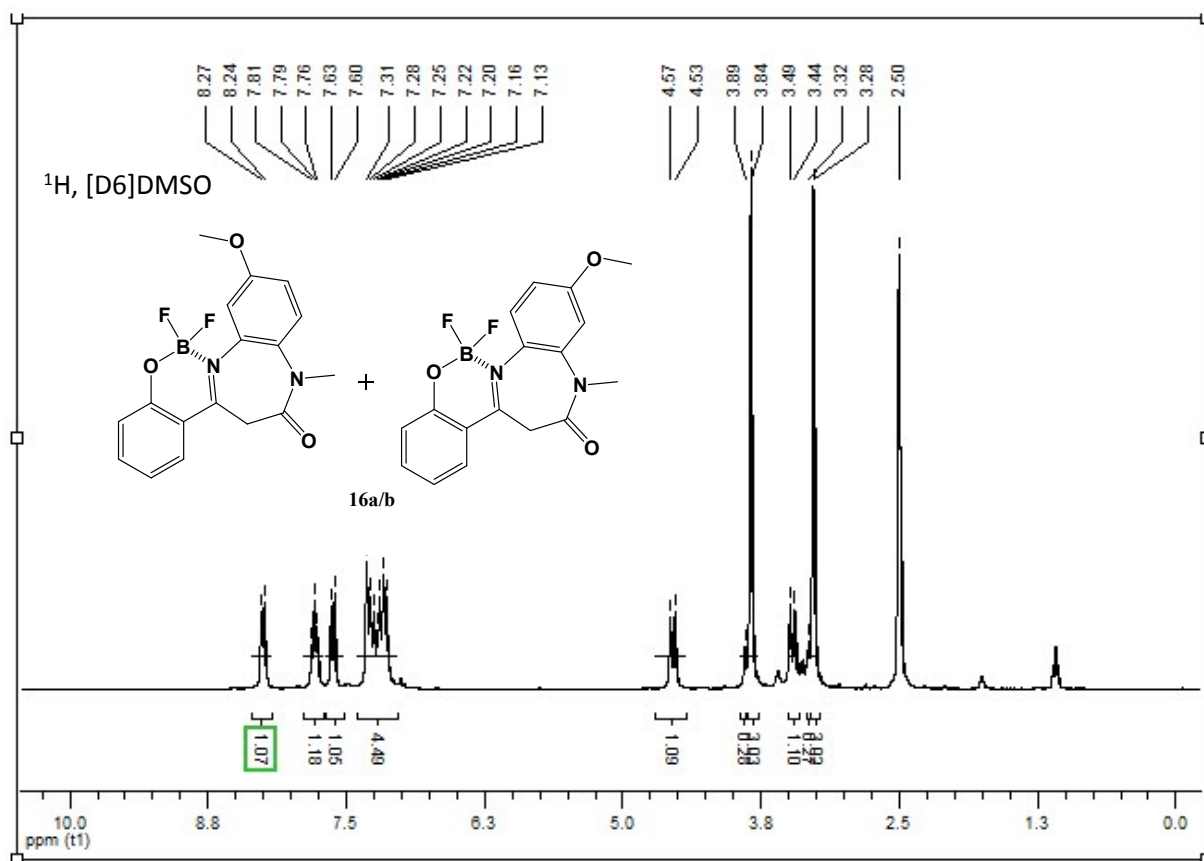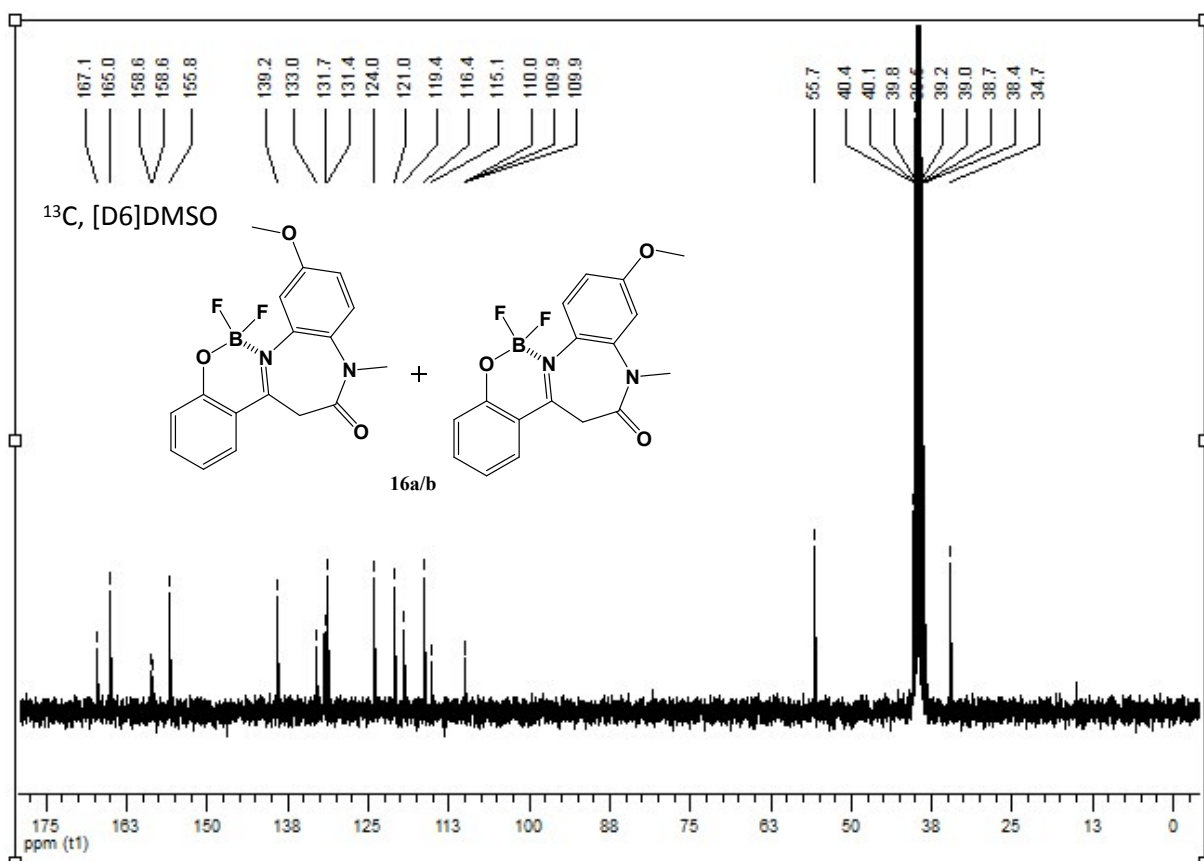

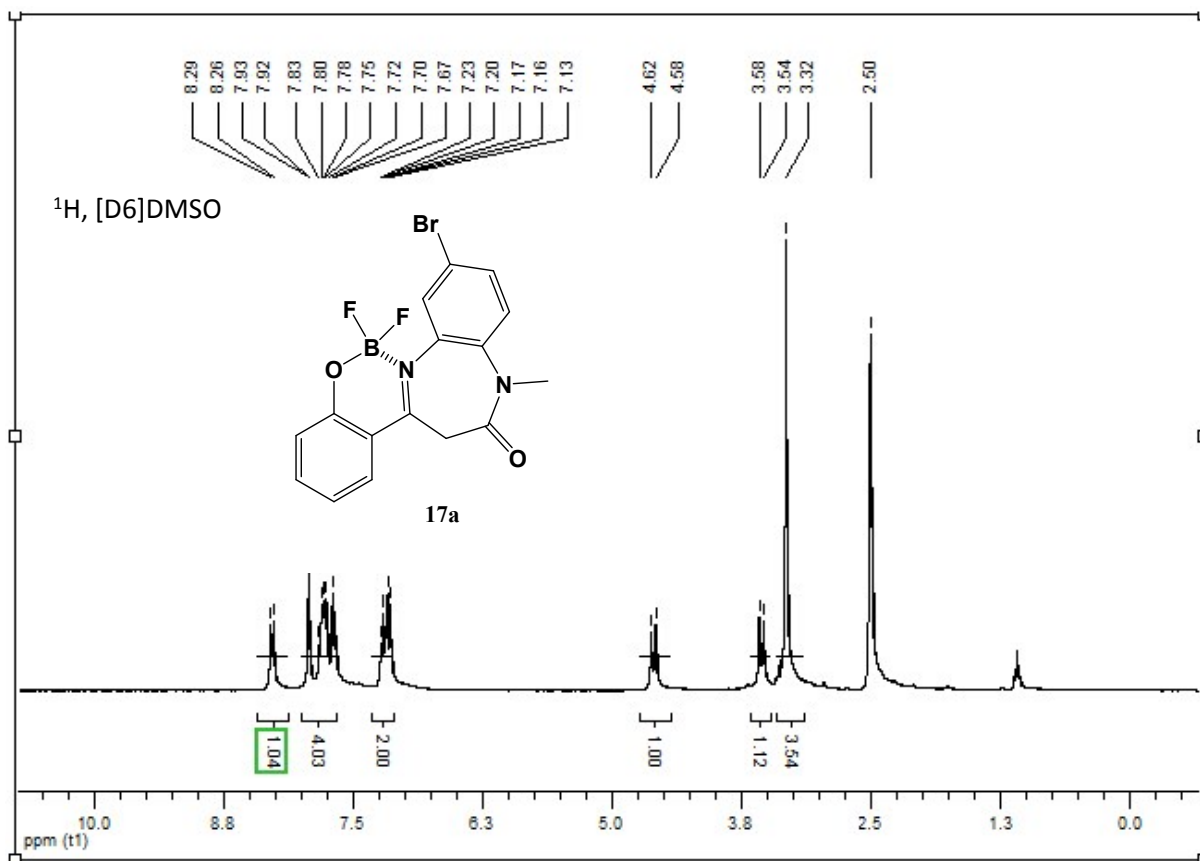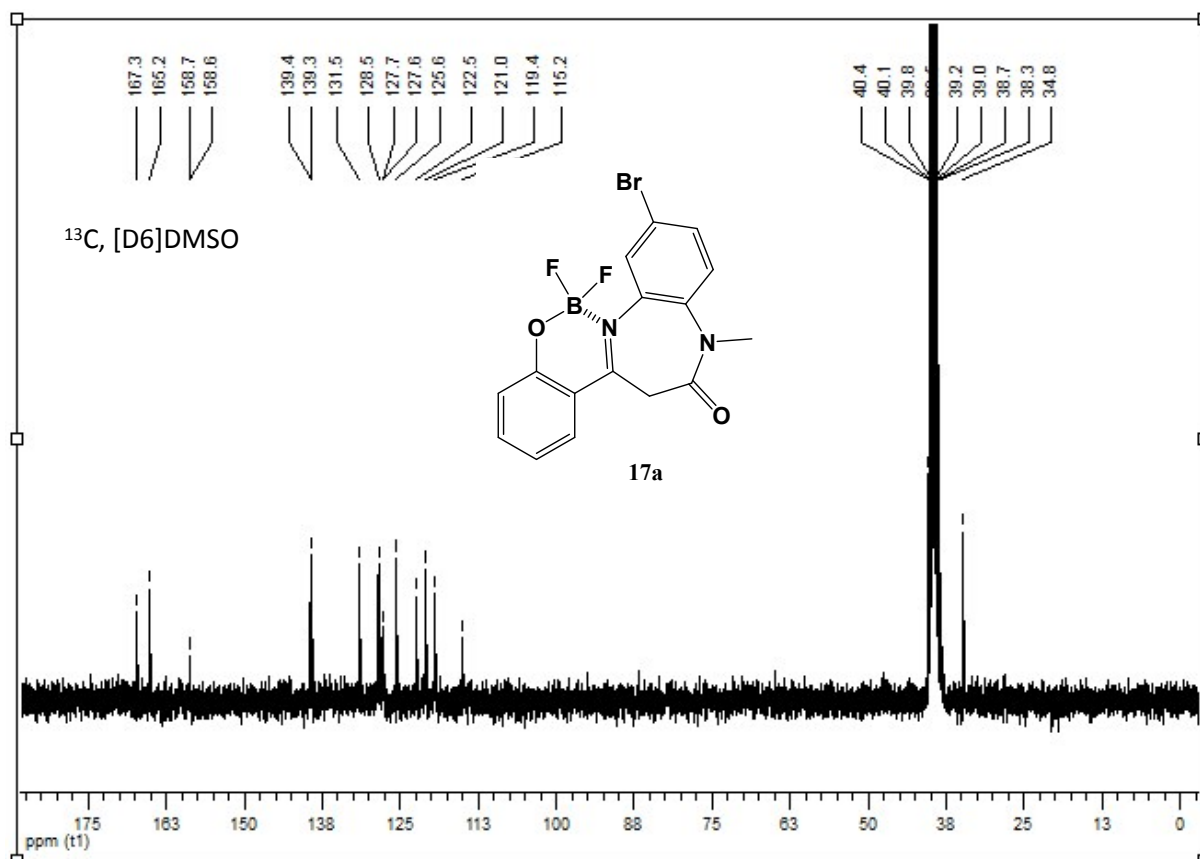

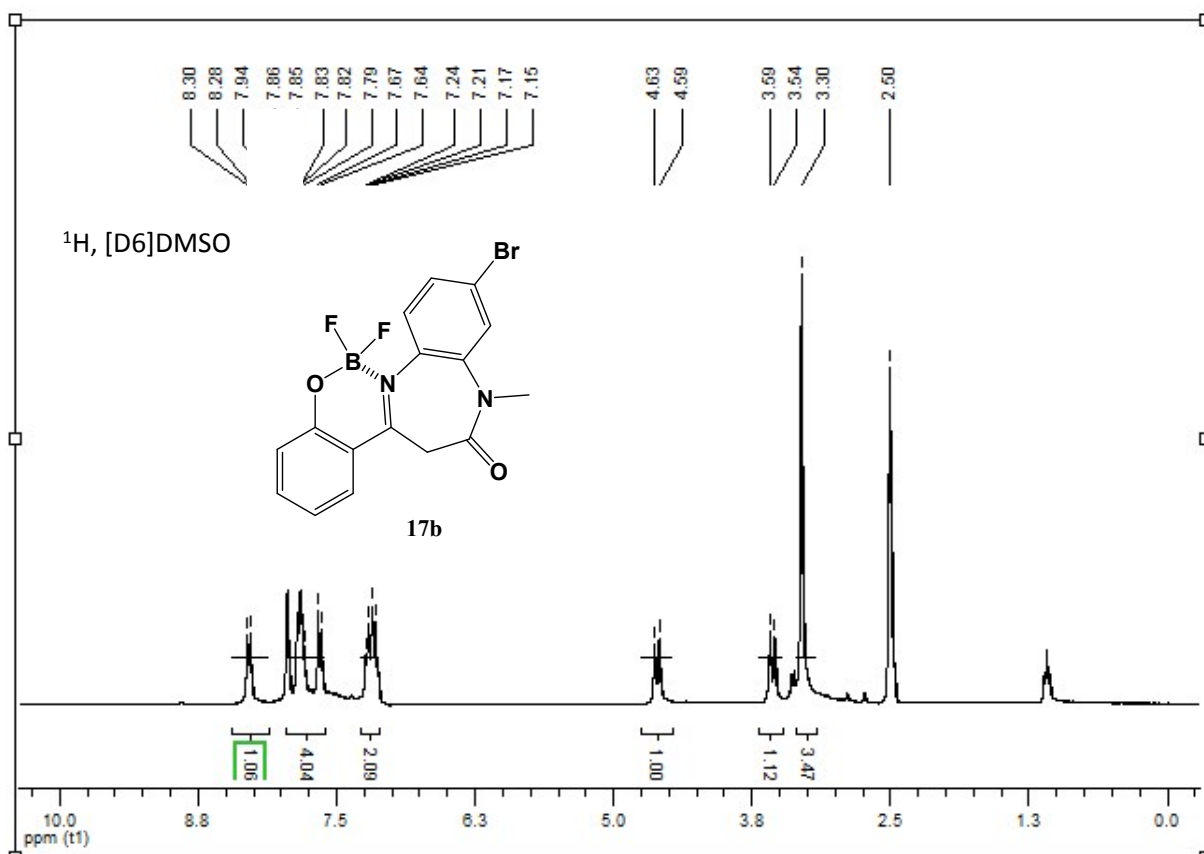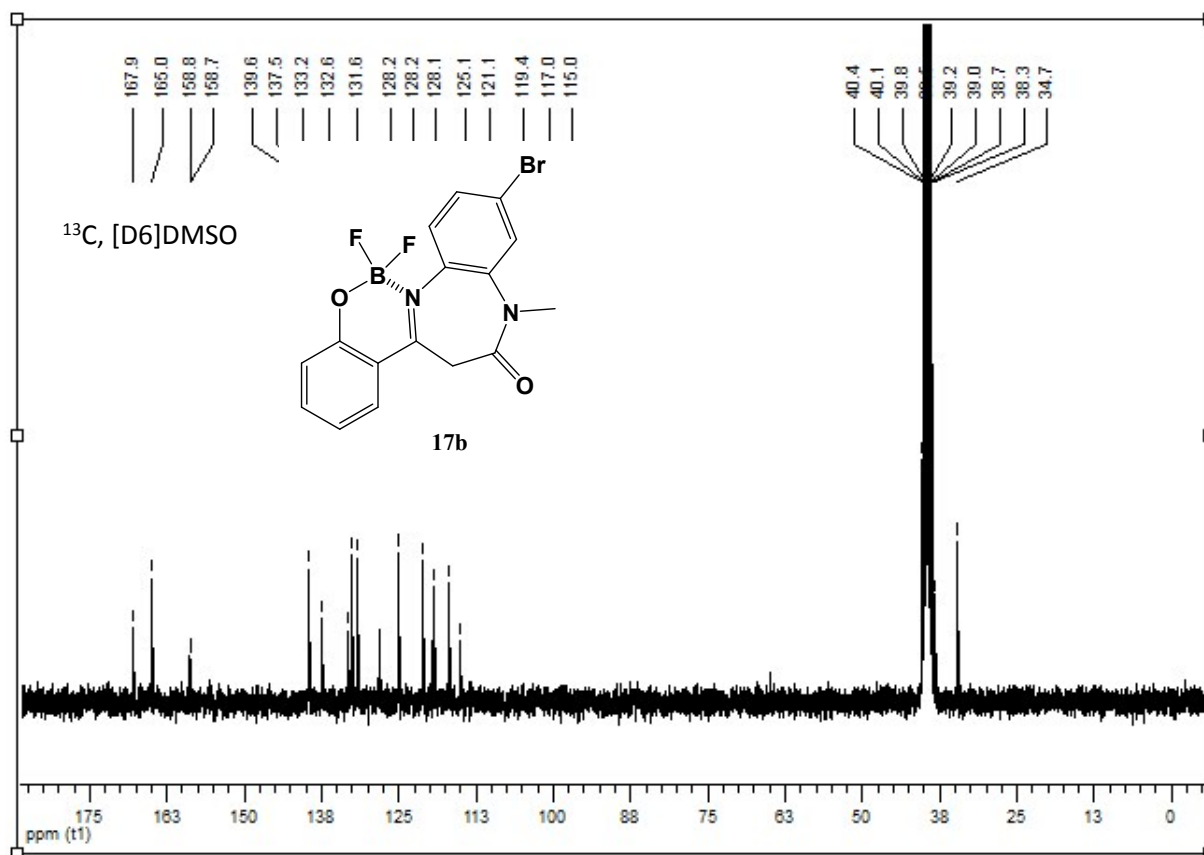

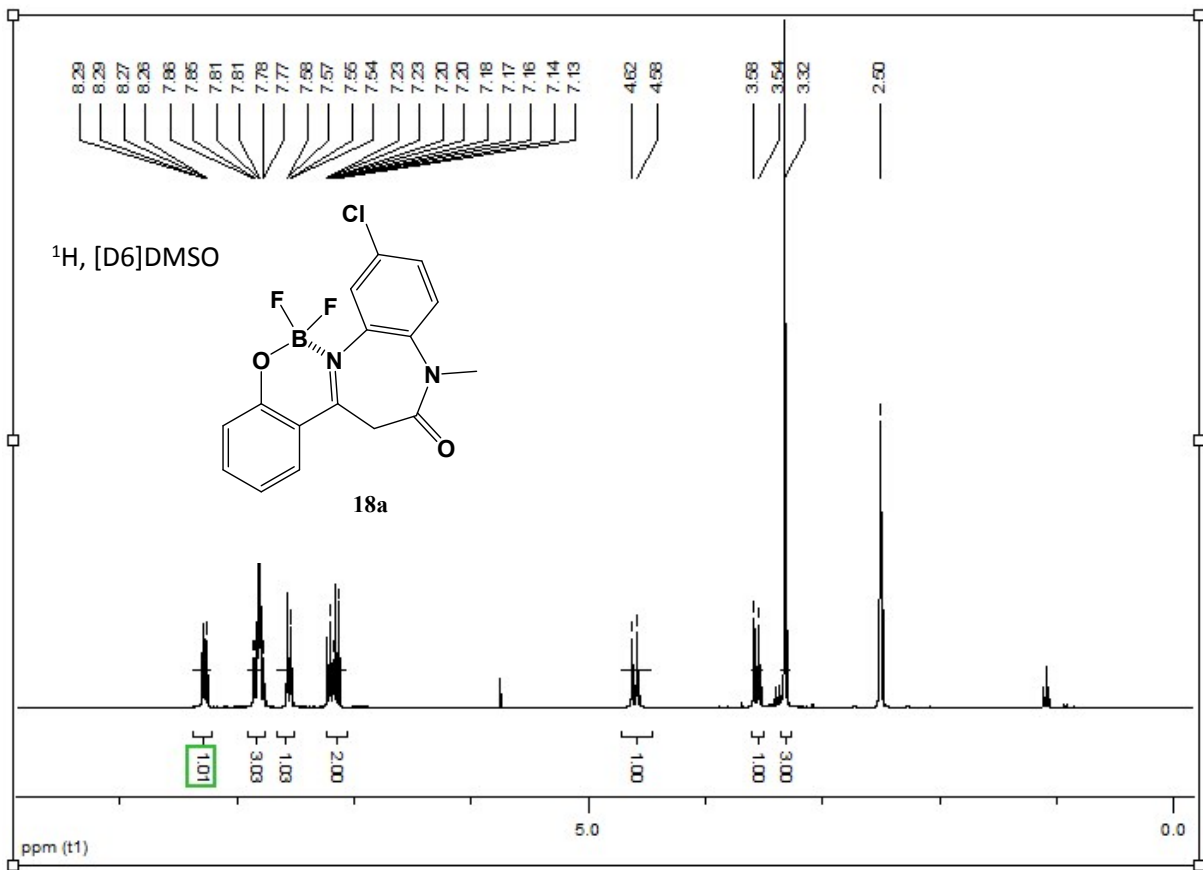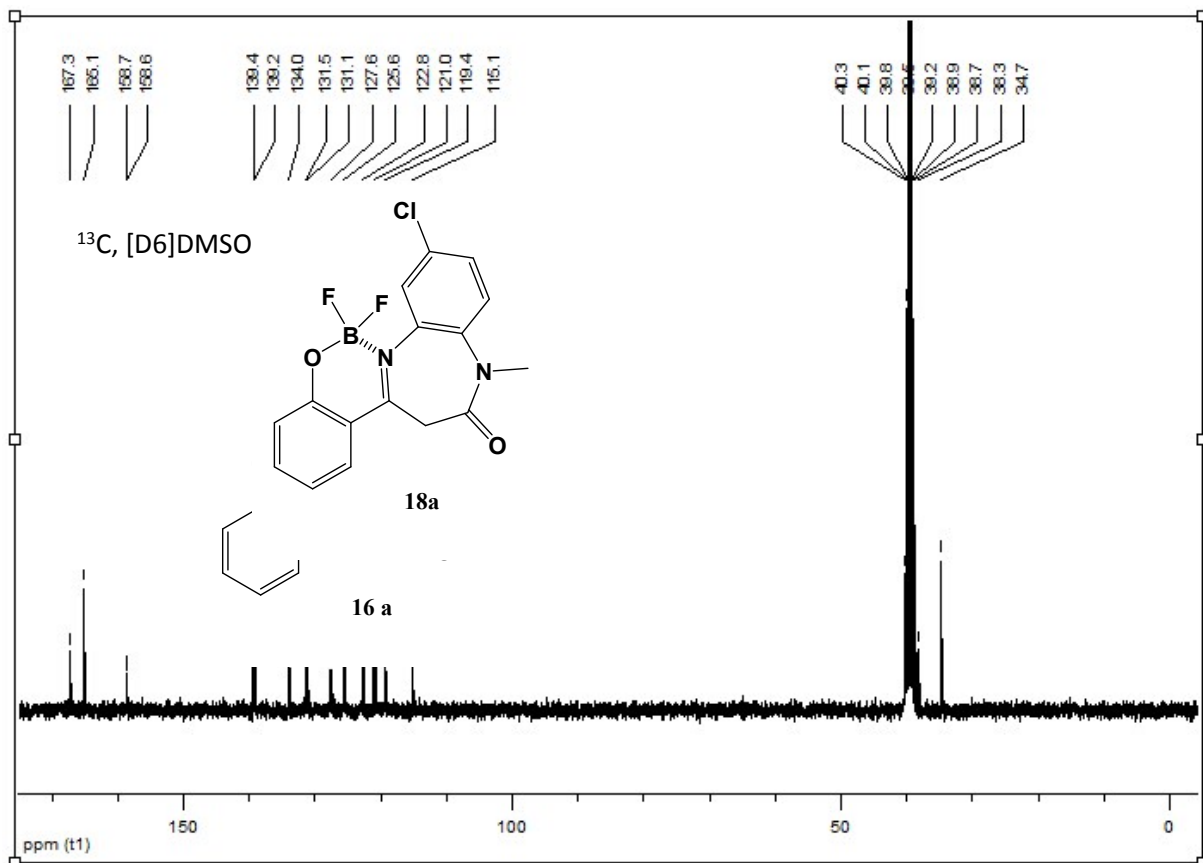



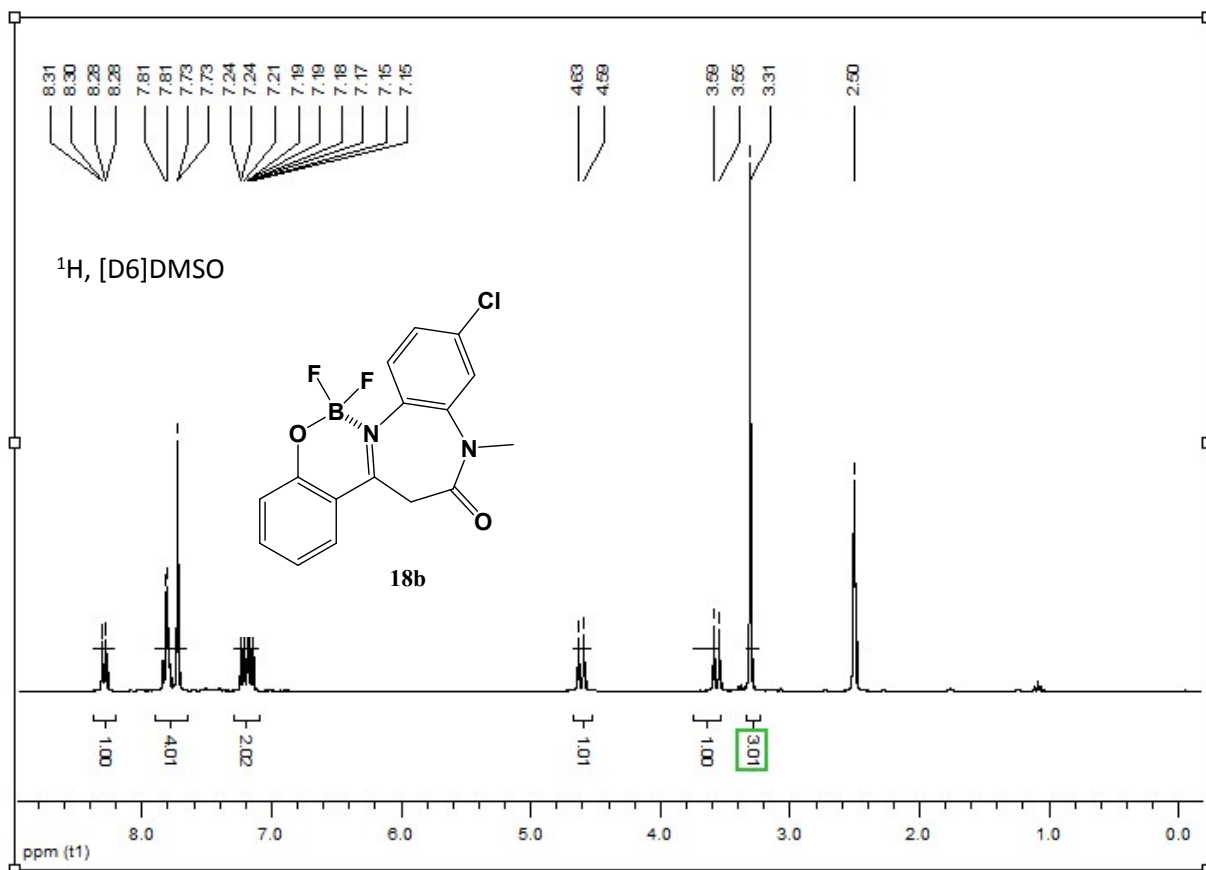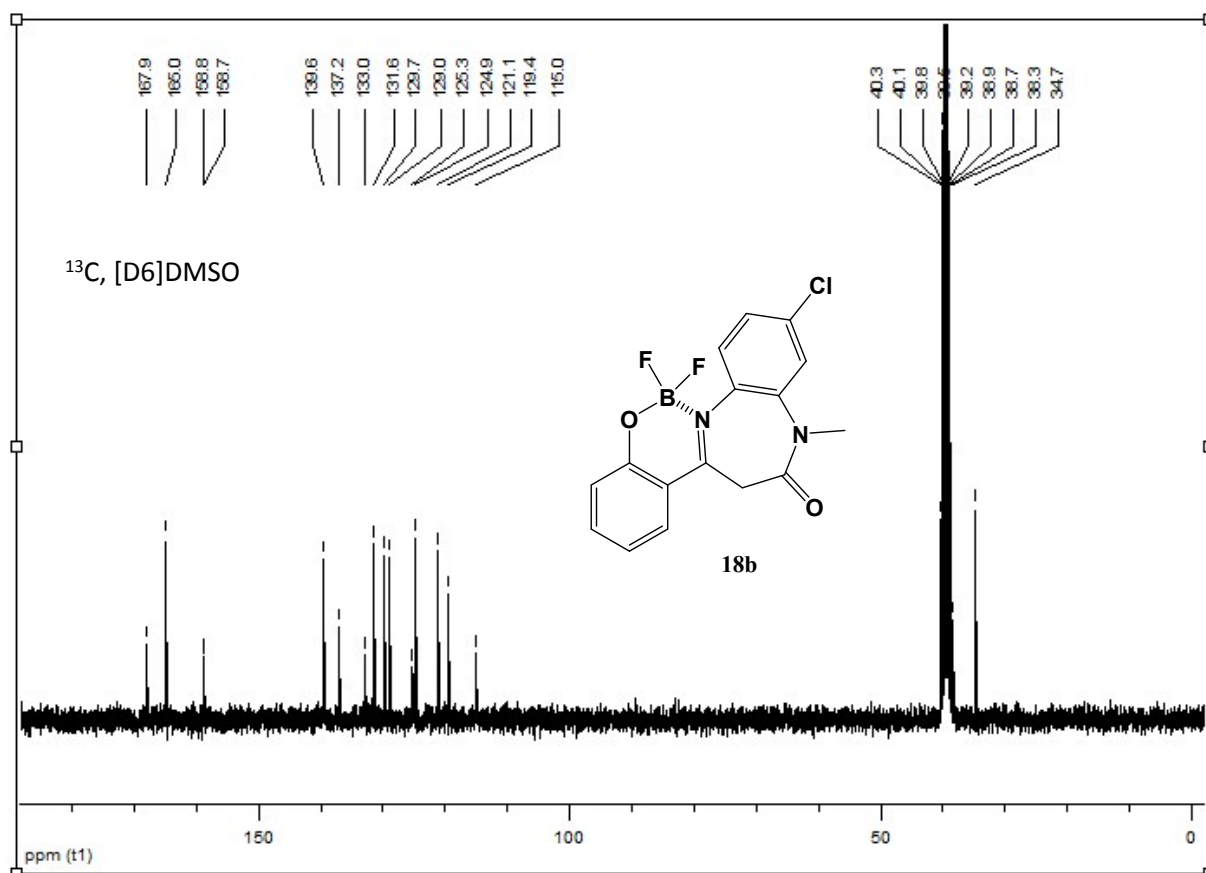

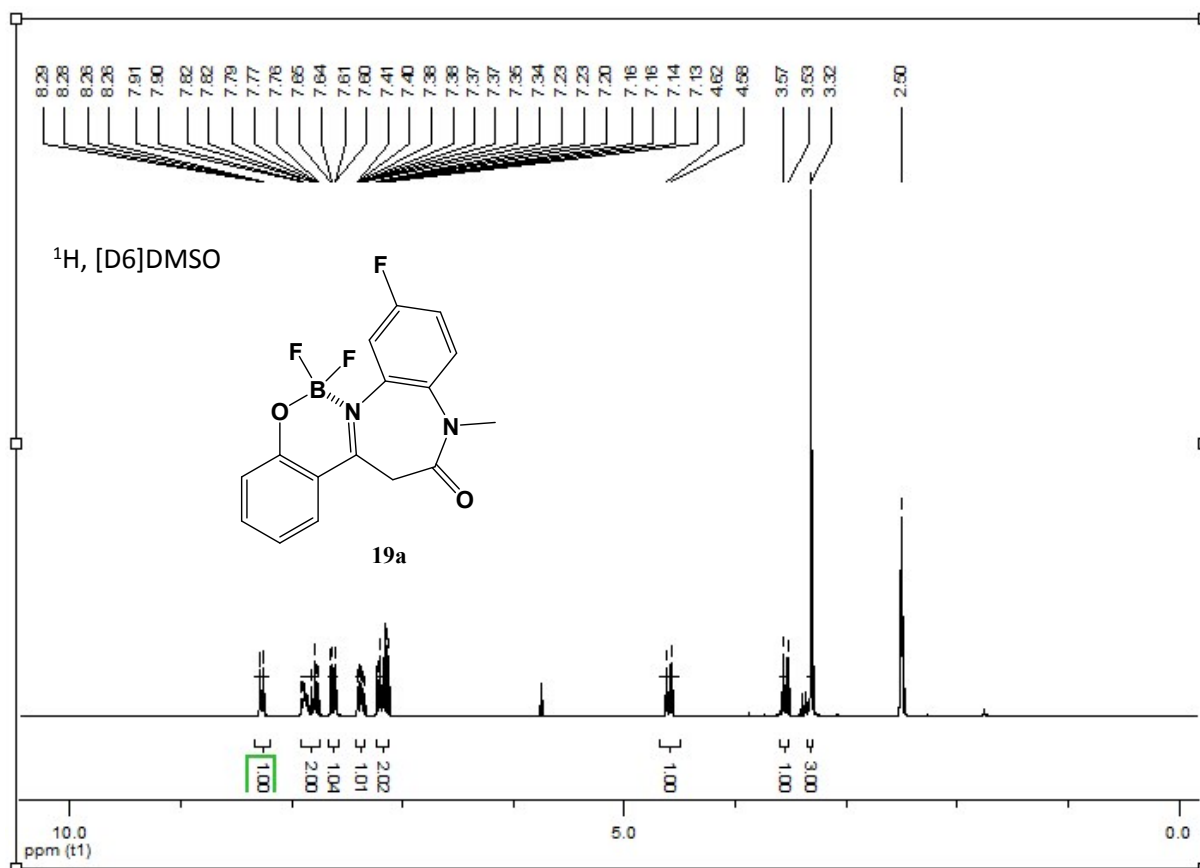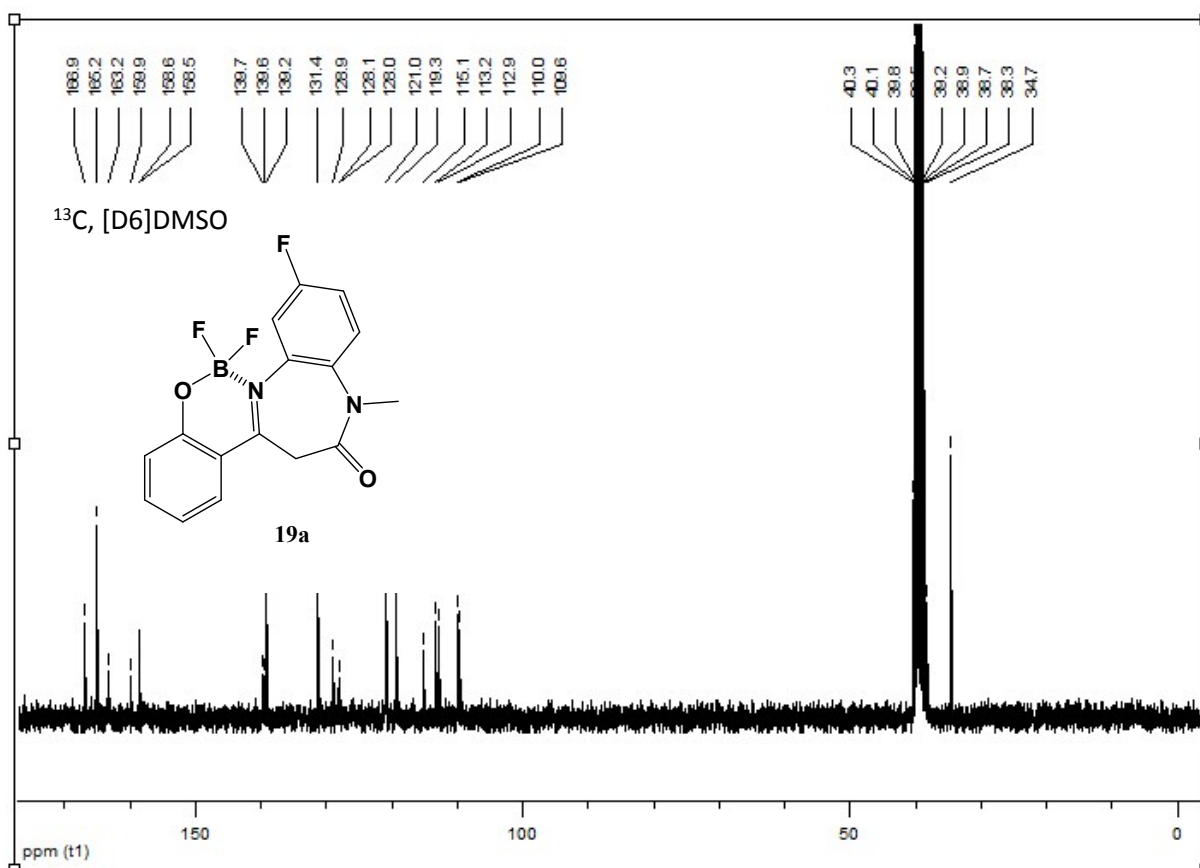

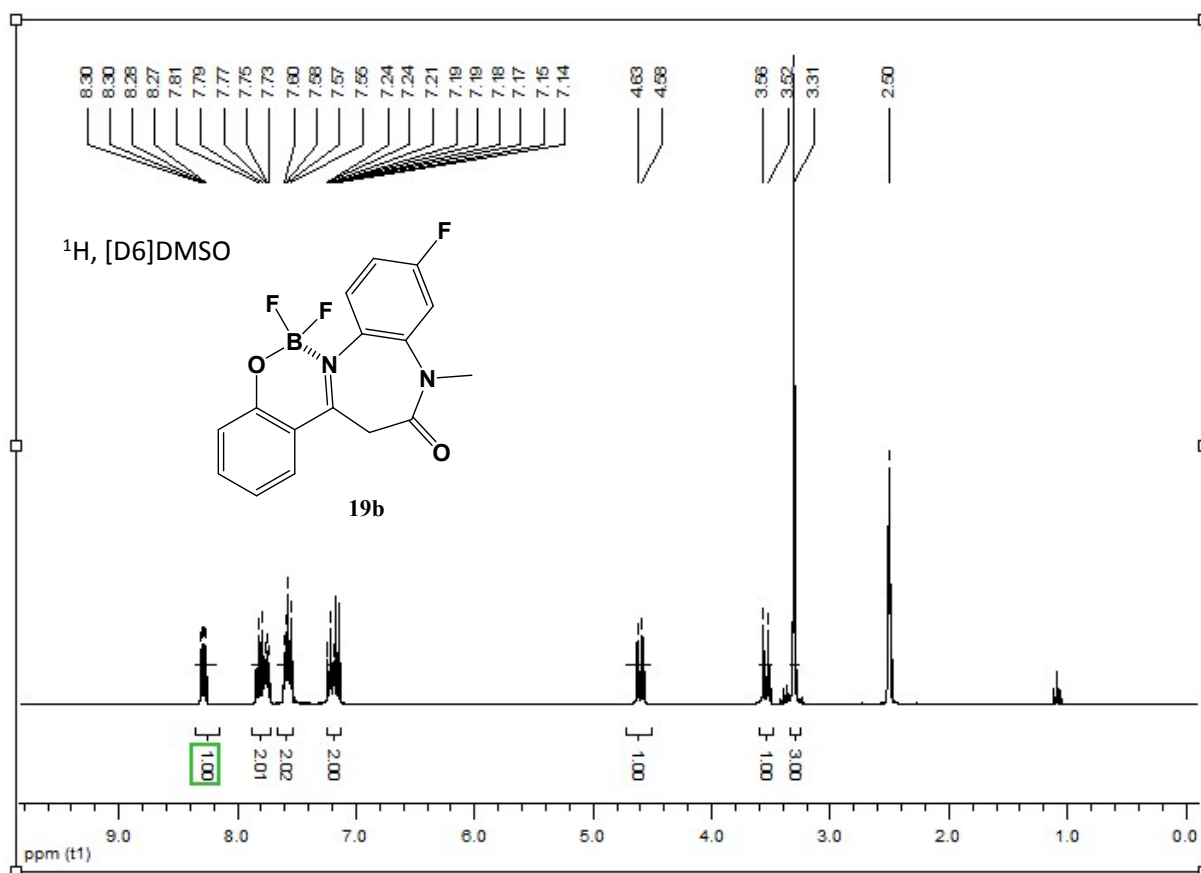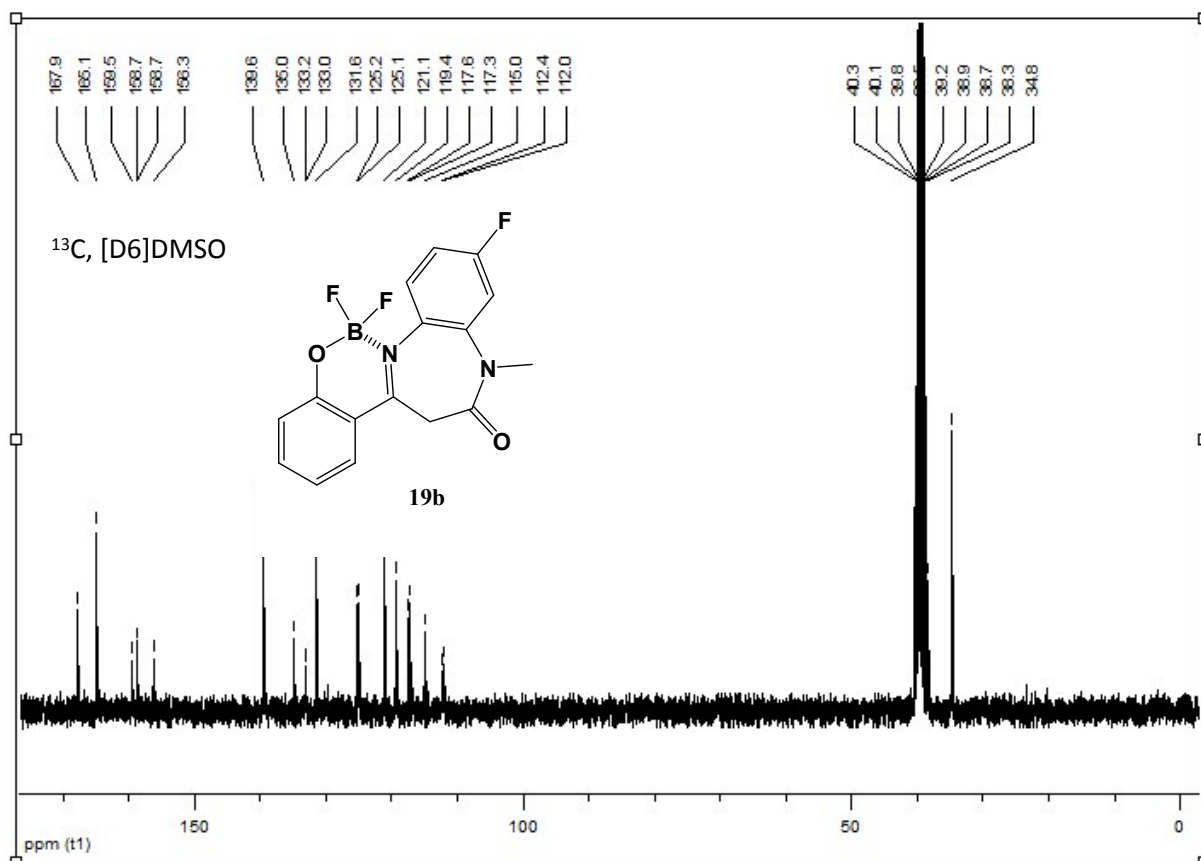

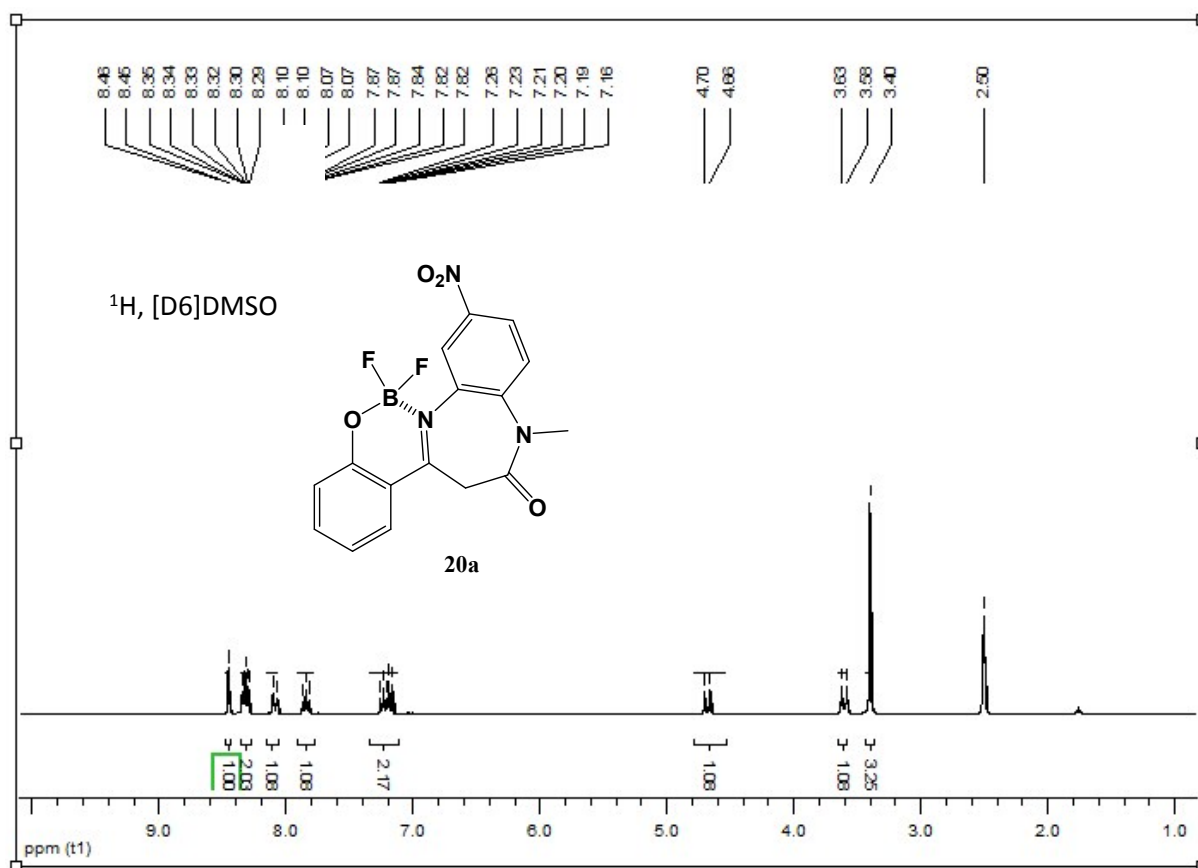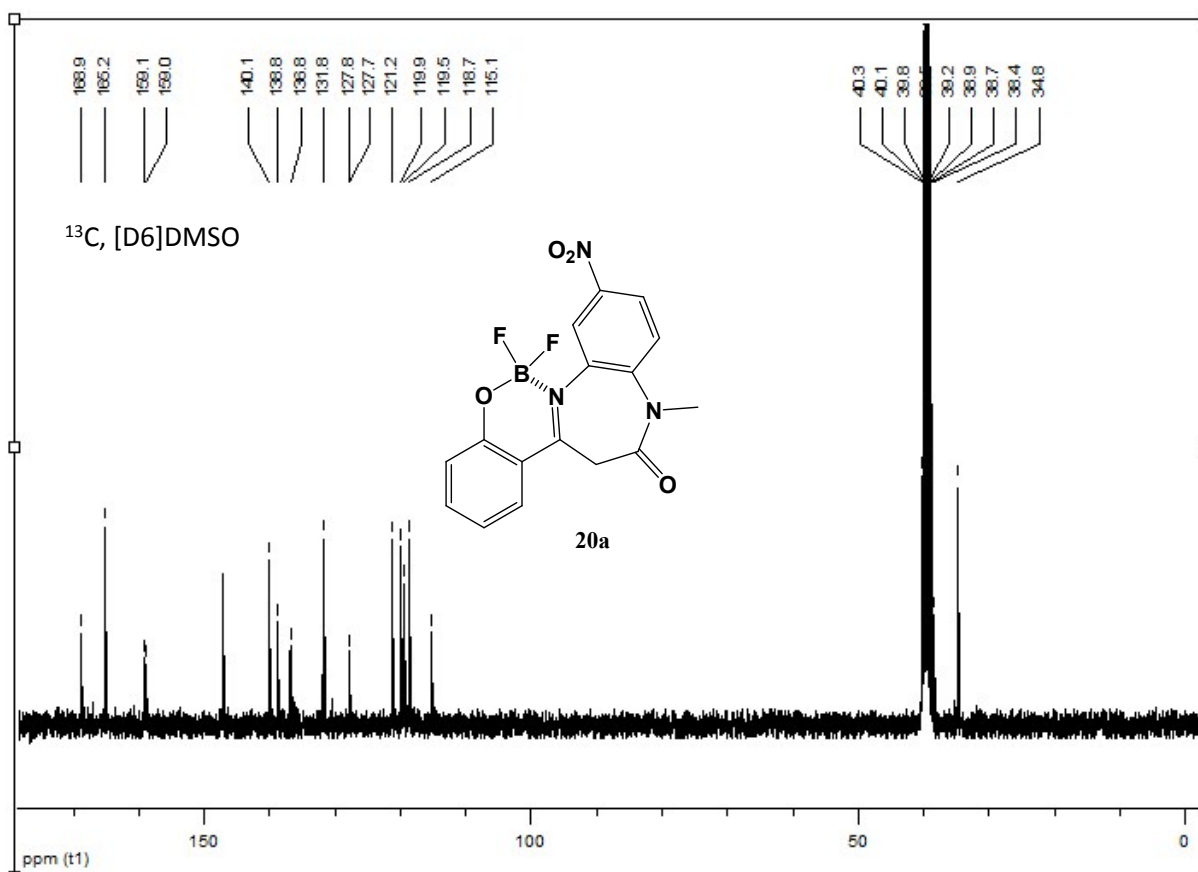

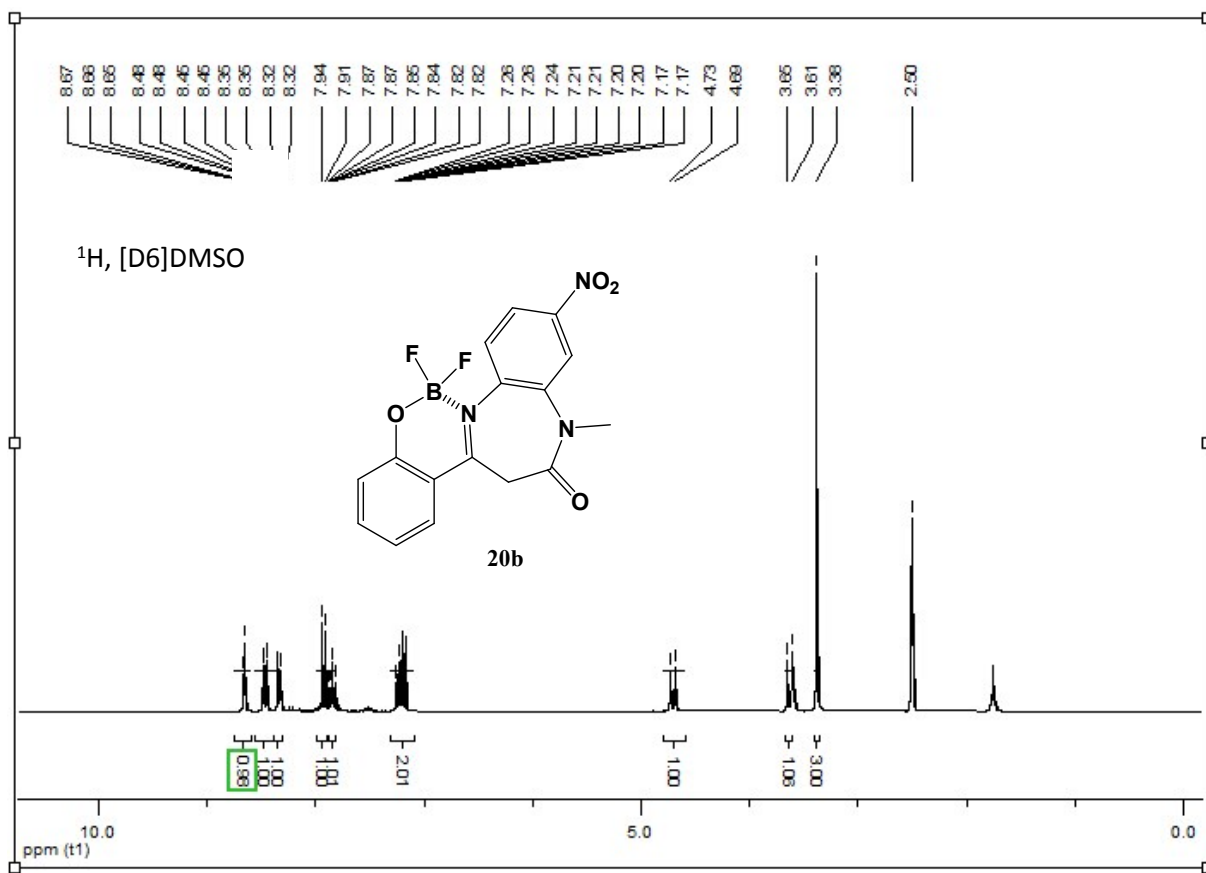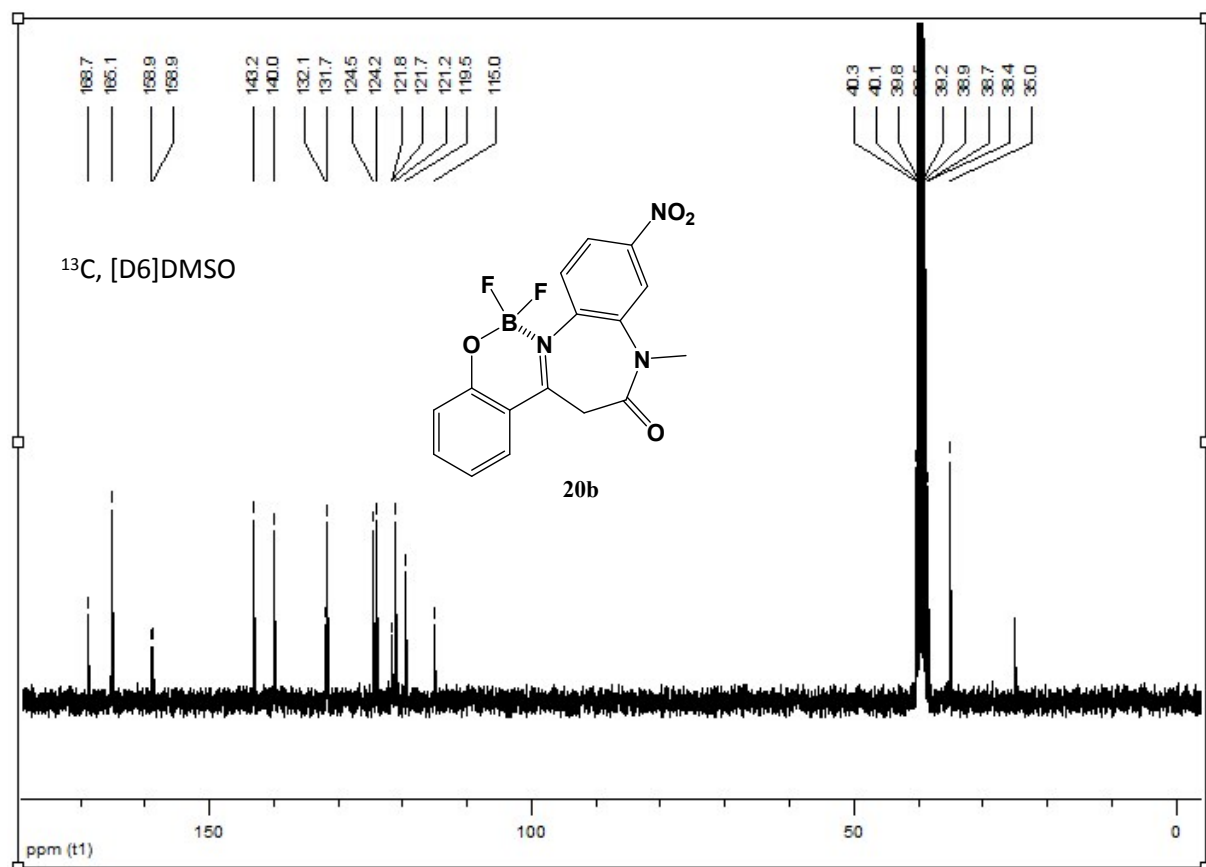

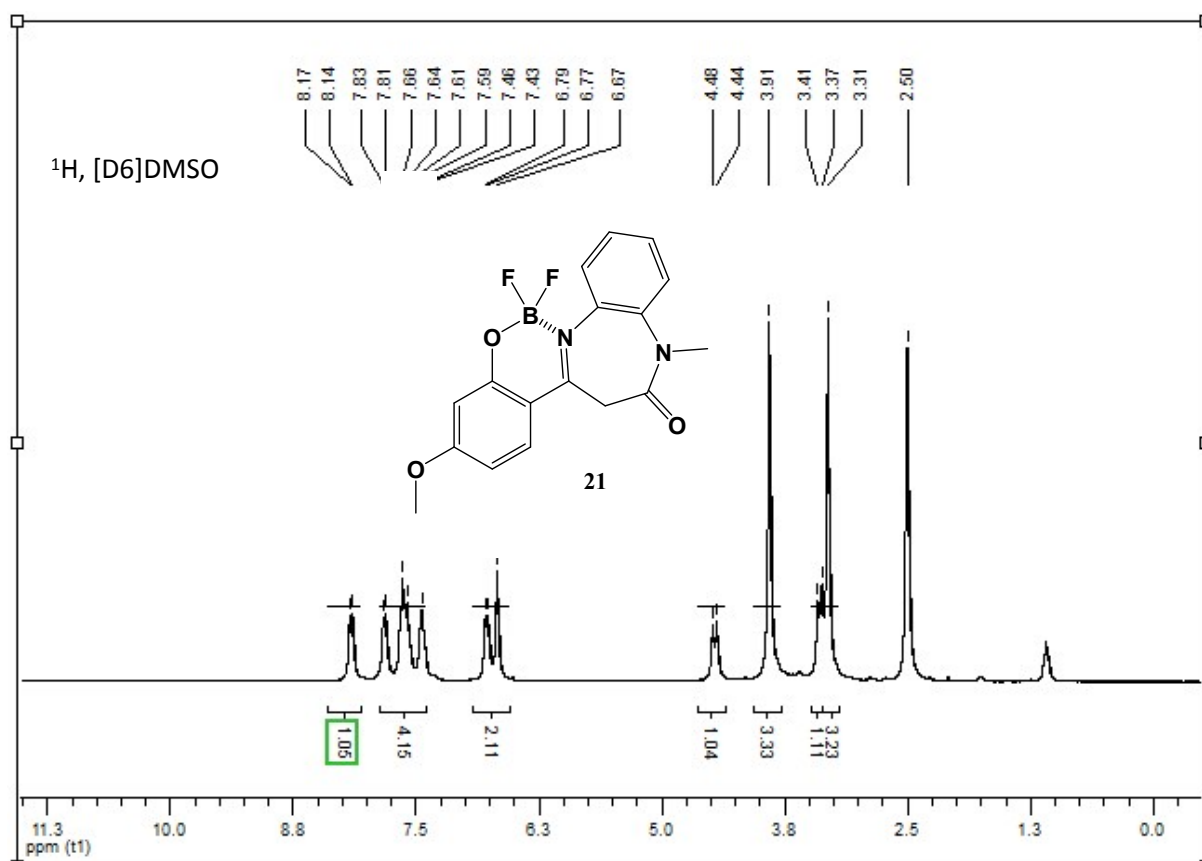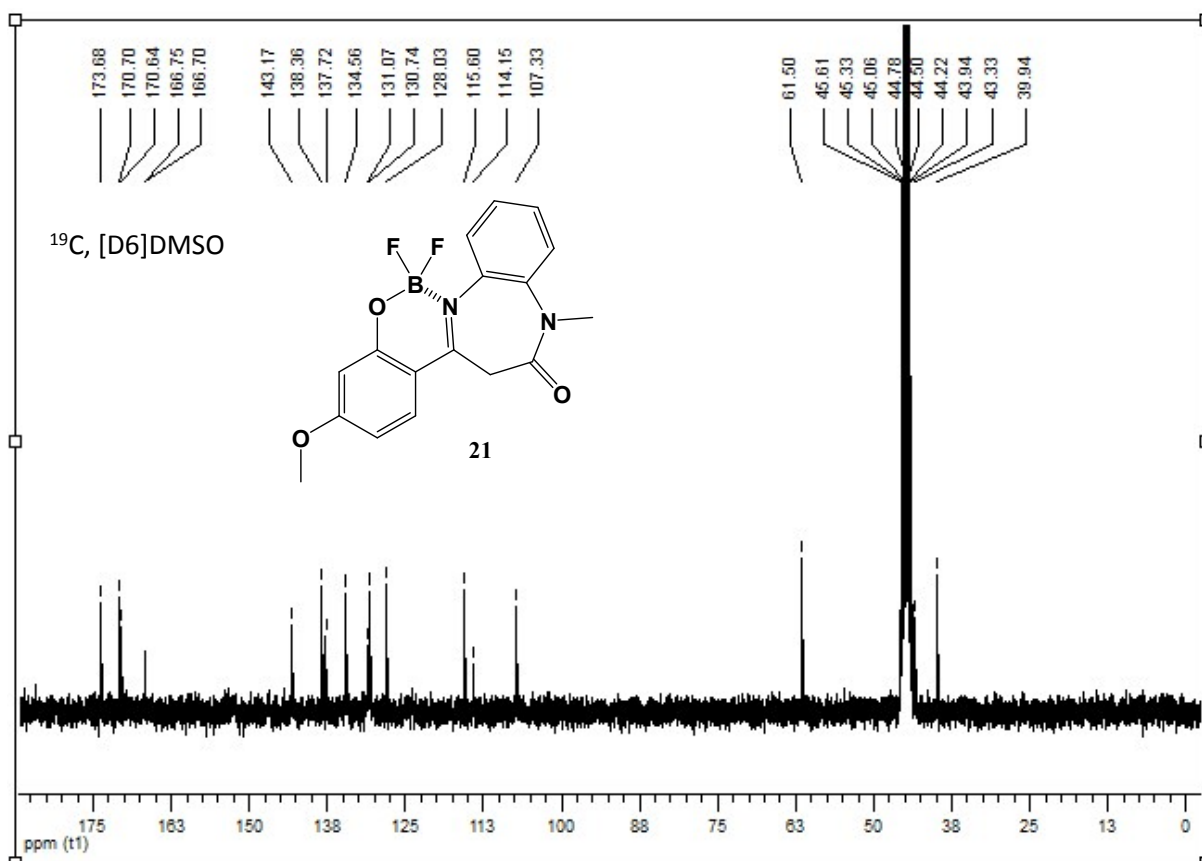

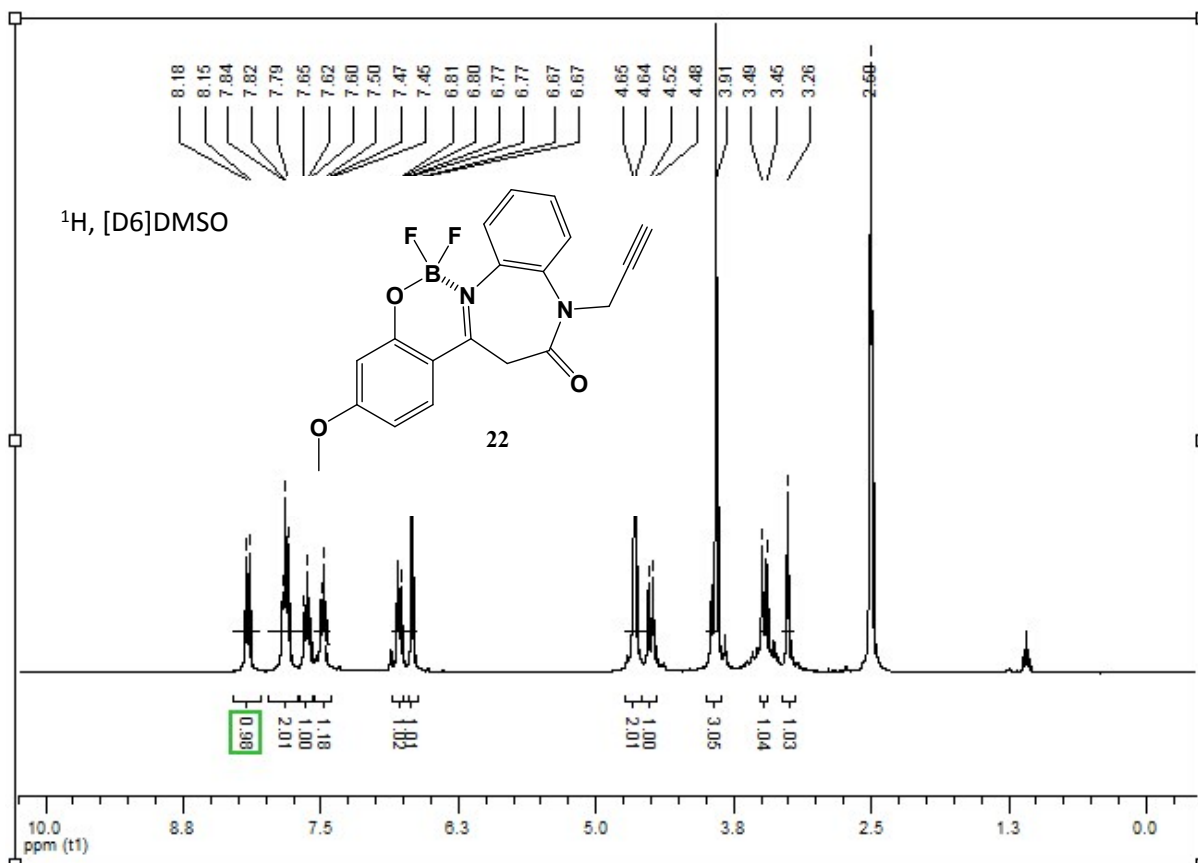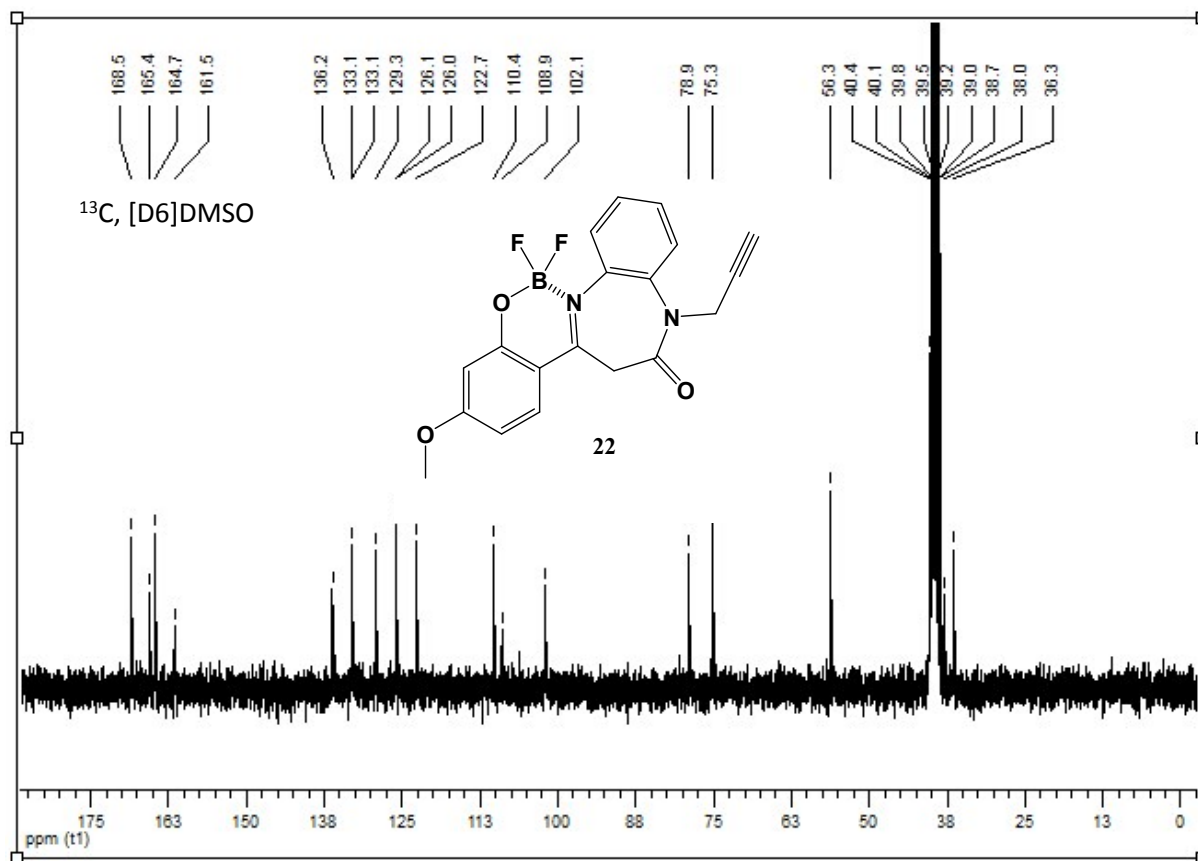

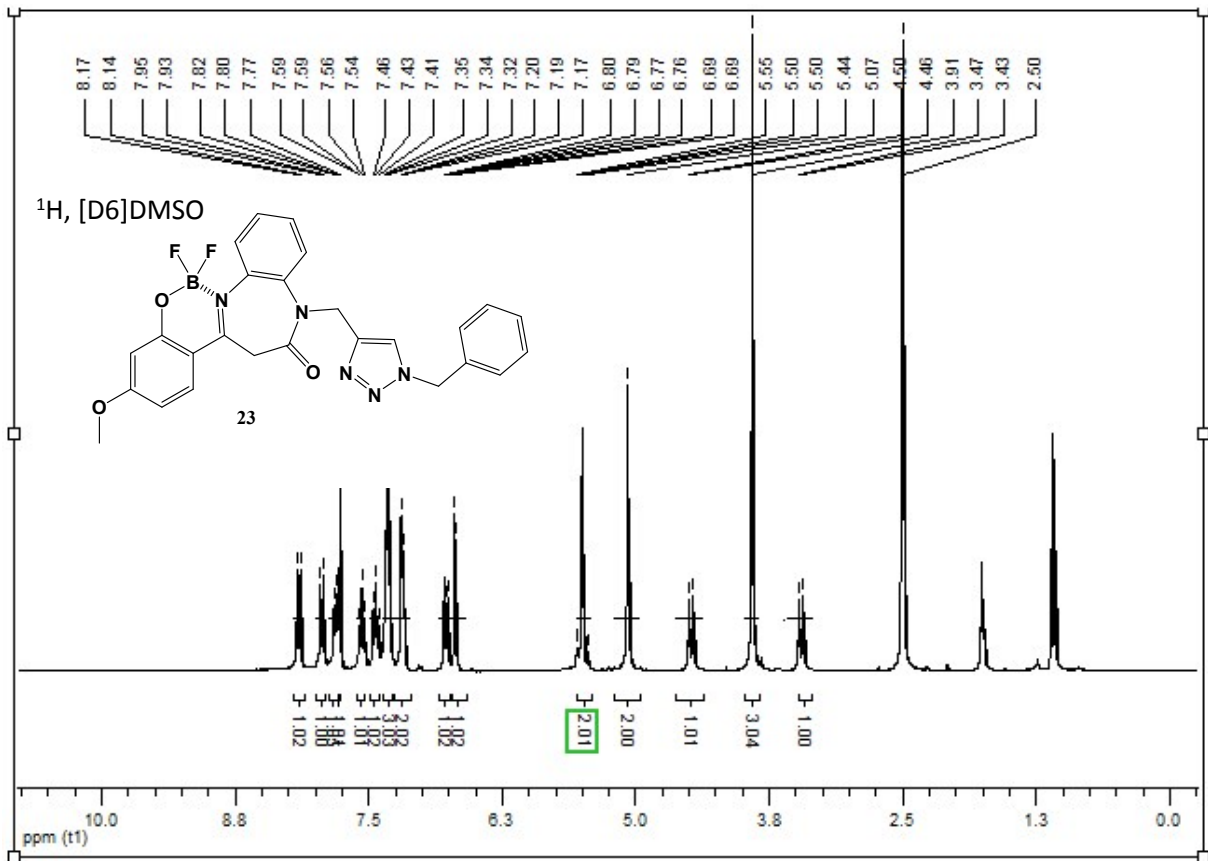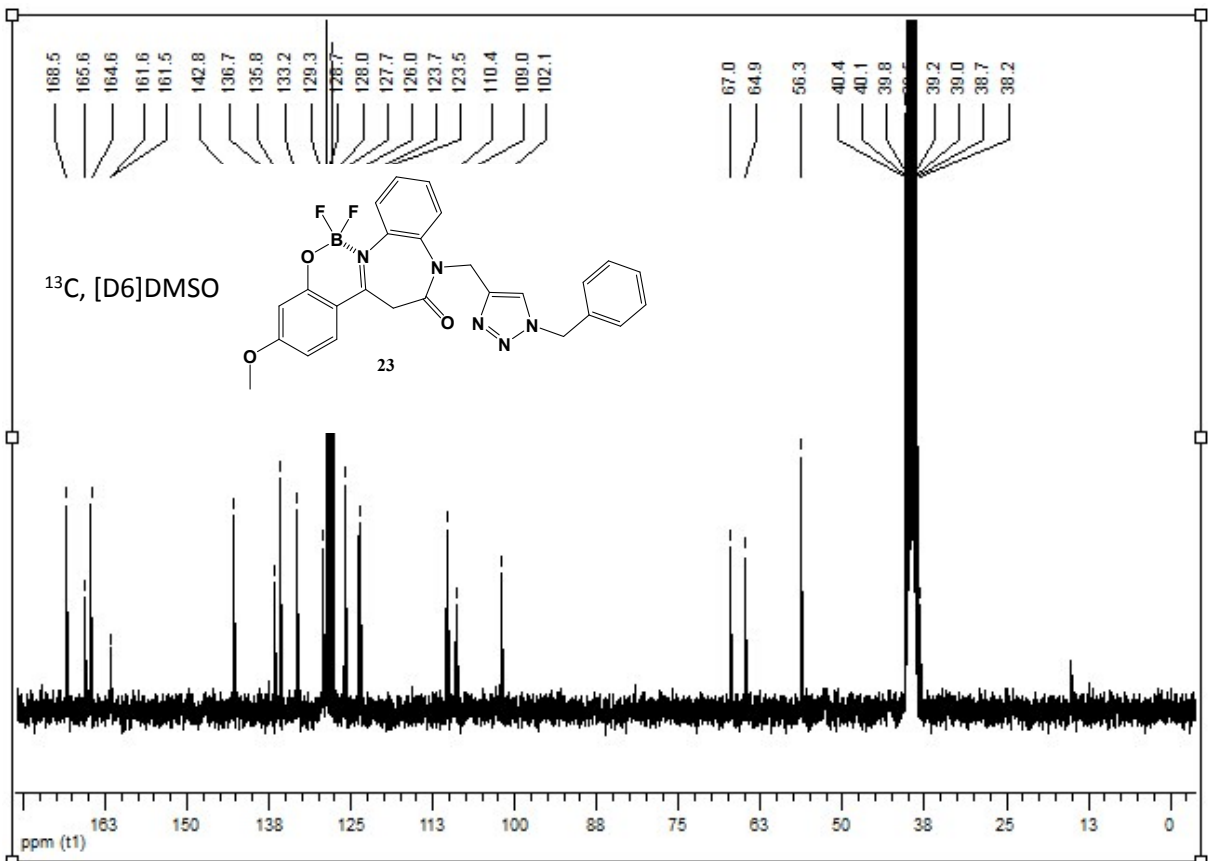



## II. Crystallographic data

### DATA COLLECTION

The crystal structure of compound **13** [C<sub>16</sub>H<sub>13</sub>BF<sub>2</sub>N<sub>2</sub>O<sub>2</sub>] has been determined from single crystal X-Ray diffraction. The chosen crystal was stuck on a glass fibre and mounted on the full three-circle goniometer of a Bruker SMART APEX diffractometer with a CCD area detector. Three sets of exposures (a total of 1800 frames) were recorded, corresponding to three  $\omega$  scans (steps of 0.3°), for three different values of  $\phi$ . The details of data collection are given in annexe 1.

The cell parameters and the orientation matrix of the crystal were preliminary determined by using SMART Software<sup>1</sup>. Data integration and global cell refinement were performed with SAINT Software<sup>2</sup>. Intensities were corrected for Lorentz, polarisation, decay and absorption effects (SAINT and SADABS Softwares) and reduced to  $F_o^2$ . The program package WinGX<sup>3</sup> was used for space group determination, structure solution and refinement.

### DATA REFINEMENT

The standard space group  $P2_1/c$  (n°14) was determined from systematic extinctions and relative  $F_o^2$  of equivalent reflections. The structure was solved by direct methods<sup>4</sup>. Anisotropic displacement parameters were refined for all non-hydrogen atoms. Every Hydrogen atoms were located from subsequent difference Fourier syntheses and placed with geometrical constraints (SHELXL<sup>5</sup>). The final cycle of full-matrix least-square refinement on  $F^2$  was based on 2887 observed reflections and 228 variable parameters and converged with unweighted and weighted agreement factors of:

$R1 = 0.0357$ ,  $wR2 = 0.0977$  for 2458 reflections with  $I > 2\sigma I$  and  $R1 = 0.0420$ ,  $wR2 = 0.1022$  for all data.

The refinement data are given in annexe 1 table 2

## CRYSTALLOGRAPHIC DATA AND STRUCTURAL DESCRIPTION

### *Crystallographic data*

The crystal data are collected in Table 1. The full crystallographic parameters (atomic coordinates, bond length, angles and anisotropic displacements) are reported in annexe 2.

|                                                                         |                                                                               |
|-------------------------------------------------------------------------|-------------------------------------------------------------------------------|
| Chemical Formula                                                        | C <sub>16</sub> H <sub>13</sub> BF <sub>2</sub> N <sub>2</sub> O <sub>2</sub> |
| Molecular Weight / <i>g.mol</i> <sup>-1</sup>                           | 314.09                                                                        |
| Crystal System                                                          | Monoclinic                                                                    |
| Space Group                                                             | P21/c                                                                         |
| Z, Z' (asymmetric units per unit cell)                                  | 4,1                                                                           |
| a / Å                                                                   | 10.173(1)                                                                     |
| b / Å                                                                   | 7.374(1)                                                                      |
| c / Å                                                                   | 19.011(2)                                                                     |
| α / °                                                                   | 90                                                                            |
| β / °                                                                   | 94.747(2)                                                                     |
| γ / °                                                                   | 90                                                                            |
| V / Å <sup>3</sup>                                                      | 1421.4(2)                                                                     |
| d <sub>calc</sub> / <i>g.cm</i> <sup>-3</sup>                           | 1.468                                                                         |
| F(000) / e <sup>-</sup>                                                 | 648                                                                           |
| Absorption coefficient μ (MoKα <sub>1</sub> ) / <i>mm</i> <sup>-1</sup> | 0.114                                                                         |

## Structural description

The asymmetric unit is composed of one molecule of  $C_{16}H_{13}N_2O_2B$  (figure1). The Fluorine atoms are presenting a disordered distribution on two crystallographic sites with 73/27 % of statistical occupancy.

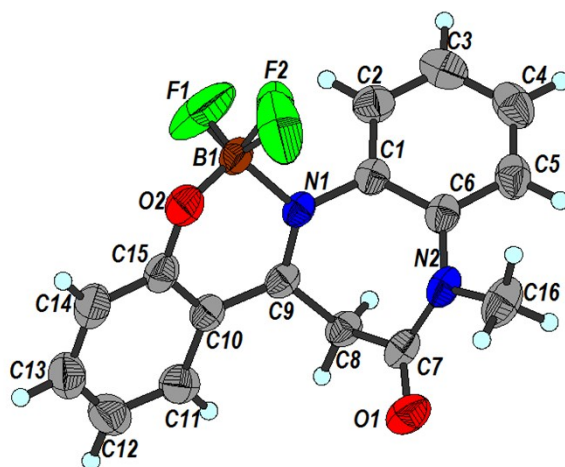

Figure 1: Asymmetric unit in ORTEP representation , with atom labels.

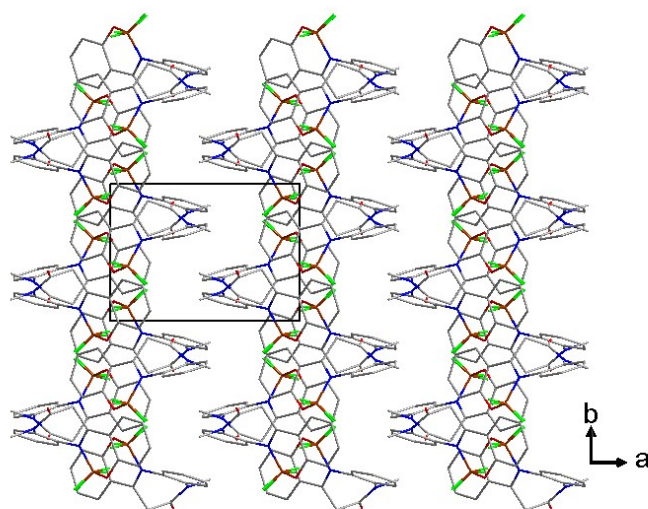

Figure 2: Projection along c.

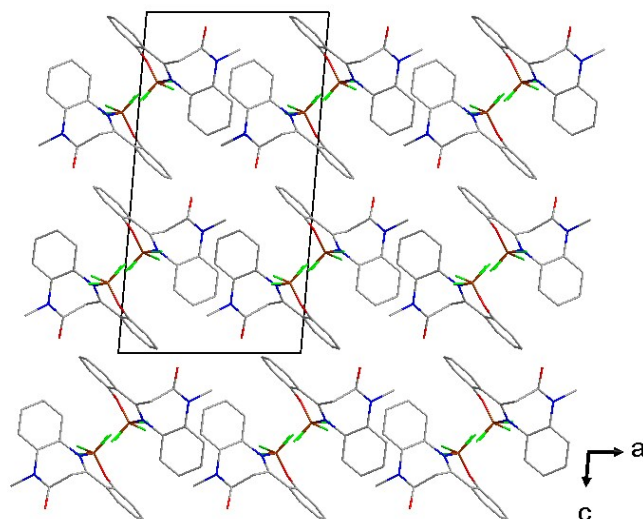

Figure 3: Projection along b

Sofwares :

(1)- SMART for WNT/2000 V5.622 (2001), Smart software reference manual, Bruker Advanced X Ray Solutions, Inc., Madison, Wisconsin, USA.

(2)- SAINT+ V6.02 (1999), Saint software reference manual, Bruker Advanced X Ray Solutions, Inc., Madison, Wisconsin, USA.

(3)-WinGX: Version 1.70.01: An integrated system of Windows Programs for the solution, refinement and analysis of Single Crystal X-Ray Diffraction Data, By Louisl. Farrugia, Dept. of chemistry, University of Glasgow.

L. J. Farrugia (1999) J. Appl. Cryst. 32, 837-838.

(4)-include in WinGX suite : SIR 92: A. Altomare, G. Cascarano, & A. Gualardi (1993) J. Appl. Cryst. 26, 343-350; SHELXS-97: Sheldrick, G. M., (1990) Acta cryst, A46, 467.

(5)-include in WinGX suite: SHELXL-97 – a program for crystal structure refinement, G. M. .Sheldrick, University of Goettingen, Germany, 1997, release 97-2.

(6)-PowderCell for Windows (version 2.4) by Kraus W. & Nolze G., Federal institute for materials Research and testing, Rudower Chausse 5, 12489 Berlin Germany.

**ANNEXE 1 :**

**- Table 1 : DATA COLLECTION FOR COMPOUND 13**

|                                                                         |                                                                              |
|-------------------------------------------------------------------------|------------------------------------------------------------------------------|
| Date                                                                    | <b>10/06/16</b>                                                              |
| Temperature / K                                                         | RT                                                                           |
| Radiation                                                               | Mo-K $\alpha_1$ ( $\lambda = 0.71073\text{\AA}$ )                            |
| Monochromator                                                           | Graphite                                                                     |
| Collimator / mm                                                         | 0.5                                                                          |
| Generator set                                                           | 50 kV 40mA                                                                   |
| Crystal-detector distance / mm                                          | 60                                                                           |
| Detector 2 $\theta$ angle / °                                           | -28                                                                          |
| $\omega$ oscillations / °                                               | -0.3                                                                         |
| $\omega$ scan 1                                                         | $\chi = 54.7^\circ, \phi = 0^\circ, -28^\circ \leq \omega \leq -208^\circ$   |
| $\omega$ scan 2                                                         | $\chi = 54.7^\circ, \phi = 120^\circ, -28^\circ \leq \omega \leq -208^\circ$ |
| $\omega$ scan 3                                                         | $\chi = 54.7^\circ, \phi = 240^\circ, -28^\circ \leq \omega \leq -208^\circ$ |
| Time exposure / s                                                       | 20                                                                           |
| Total number of reflections                                             | 10887                                                                        |
| Unique reflections [ $F_o > 4.0 \sigma(F_o)$ ]                          | 2887 /2458                                                                   |
| $\theta$ range / °                                                      | 2.01 to 26.34                                                                |
| hkl range                                                               | $-12 \leq h \leq 12, -9 \leq k \leq 9, -23 \leq l \leq 23$                   |
| $R_{\text{int}} = \Sigma[ F_o^2 - F_o^2(\text{mean}) ] / \Sigma[F_o^2]$ | 0.018                                                                        |
| Completeness to $\theta = 26.40$ / %                                    | 99.7                                                                         |

**- Table 2 : REFINEMENT DATA FOR COMPOUND 13**

|                                                               |                       |
|---------------------------------------------------------------|-----------------------|
| Number of reflections (n) (with $F_o > 4.0 \sigma(F_o)$ )     | 2458                  |
| Number of refined parameters (p) / restraints                 | 228                   |
| Reflection / parameter ratio                                  |                       |
| Final R indices [ $I > 2\sigma(I)$ ]                          | R1=0.0357 wR2=0.0977  |
| R indices (all data)                                          | R1=0.0420, wR2=0.1022 |
| Goodness of Fit indicator (Restrained GooF)                   | 1.061                 |
| Maximum peak in Final Difference Map / $e^{-\text{\AA}^{-3}}$ | 0.178                 |
| Maximum hole in Final Difference Map / $e^{-\text{\AA}^{-3}}$ | -0.173                |

$$R_1 = \Sigma (| |F_o| - |F_c| |) / \Sigma |F_o|$$

$$wR_2 = [ \Sigma [ w (F_o^2 - F_c^2)^2 ] / \Sigma [ w (F_o^2)^2 ] ]^{1/2}$$

$$\text{GooF} = [ \Sigma [ w (F_o^2 - F_c^2)^2 ] / (n - p) ]^{1/2}$$

## ANNEXE 2 : CRYSTALLOGRAPHIC DATA

Table 1a: Atomic coordinates ( $\times 10^4$ ) and equivalent isotropic displacement parameters ( $\text{\AA}^2 \times 10^3$ ).

U(eq) is defined as one third of the trace of the orthogonalized  $U_{ij}$  tensor

|       | x        | y        | z        | U(eq)  |
|-------|----------|----------|----------|--------|
| C(1)  | 2820(1)  | 6230(2)  | 2426(1)  | 37(1)  |
| C(2)  | 2780(1)  | 5949(2)  | 3147(1)  | 48(1)  |
| C(3)  | 3888(2)  | 6221(2)  | 3601(1)  | 57(1)  |
| C(4)  | 5053(2)  | 6749(2)  | 3335(1)  | 58(1)  |
| C(5)  | 5106(1)  | 7040(2)  | 2626(1)  | 51(1)  |
| C(6)  | 3991(1)  | 6802(2)  | 2159(1)  | 40(1)  |
| C(7)  | 3186(1)  | 8205(2)  | 1050(1)  | 41(1)  |
| C(8)  | 1992(1)  | 8767(2)  | 1431(1)  | 40(1)  |
| C(9)  | 1207(1)  | 7079(2)  | 1513(1)  | 35(1)  |
| C(10) | 36(1)    | 6674(2)  | 1055(1)  | 39(1)  |
| C(11) | -640(1)  | 8003(2)  | 636(1)   | 49(1)  |
| C(12) | -1705(2) | 7547(2)  | 184(1)   | 60(1)  |
| C(13) | -2099(1) | 5742(3)  | 125(1)   | 60(1)  |
| C(14) | -1470(1) | 4420(2)  | 527(1)   | 55(1)  |
| C(15) | -416(1)  | 4878(2)  | 1010(1)  | 43(1)  |
| C(16) | 5256(1)  | 6561(2)  | 1098(1)  | 60(1)  |
| B(1)  | 900(1)   | 3988(2)  | 2057(1)  | 42(1)  |
| F(1)  | 1807(5)  | 2676(7)  | 2256(2)  | 60(1)  |
| F(2)  | 56(2)    | 4253(5)  | 2594(2)  | 53(1)  |
| F(1B) | 230(30)  | 3960(40) | 2549(9)  | 118(6) |
| F(2B) | 1900(20) | 2760(30) | 2030(30) | 109(8) |
| N(1)  | 1653(1)  | 5876(1)  | 1974(1)  | 35(1)  |
| N(2)  | 4067(1)  | 7127(2)  | 1430(1)  | 43(1)  |
| O(1)  | 3312(1)  | 8634(2)  | 442(1)   | 57(1)  |
| O(2)  | 180(1)   | 3559(1)  | 1400(1)  | 51(1)  |

Table 1b: Hydrogen coordinates ( $\times 10^4$ ) and equivalent isotropic displacement parameters ( $\text{\AA}^2 \times 10^3$ ).

U(eq) is defined as one third of the trace of the orthogonalized Uij tensor

|        | x     | y    | z    | U(eq) |
|--------|-------|------|------|-------|
| H(2)   | 1999  | 5575 | 3324 | 57    |
| H(3)   | 3854  | 6051 | 4084 | 68    |
| H(4)   | 5807  | 6908 | 3640 | 69    |
| H(5)   | 5895  | 7401 | 2454 | 61    |
| H(8A)  | 2268  | 9282 | 1889 | 47    |
| H(8B)  | 1472  | 9662 | 1157 | 47    |
| H(11)  | -360  | 9203 | 666  | 59    |
| H(12)  | -2163 | 8437 | -82  | 72    |
| H(13)  | -2805 | 5431 | -195 | 72    |
| H(14)  | -1744 | 3220 | 479  | 65    |
| H(16A) | 5027  | 6288 | 609  | 89    |
| H(16B) | 5624  | 5503 | 1333 | 89    |
| H(16C) | 5893  | 7524 | 1134 | 89    |

Table 2: Bond lengths ( $\text{\AA}$ )

|             |            |              |            |
|-------------|------------|--------------|------------|
| C(1)-C(2)   | 1.3901(18) | C(10)-C(11)  | 1.4060(19) |
| C(1)-C(6)   | 1.3979(17) | C(11)-C(12)  | 1.369(2)   |
| C(1)-N(1)   | 1.4308(15) | C(11)-H(11)  | 0.93       |
| C(2)-C(3)   | 1.376(2)   | C(12)-C(13)  | 1.392(2)   |
| C(2)-H(2)   | 0.93       | C(12)-H(12)  | 0.93       |
| C(3)-C(4)   | 1.382(2)   | C(13)-C(14)  | 1.366(2)   |
| C(3)-H(3)   | 0.93       | C(13)-H(13)  | 0.93       |
| C(4)-C(5)   | 1.371(2)   | C(14)-C(15)  | 1.3938(19) |
| C(4)-H(4)   | 0.93       | C(14)-H(14)  | 0.93       |
| C(5)-C(6)   | 1.3919(19) | C(15)-O(2)   | 1.3380(17) |
| C(5)-H(5)   | 0.93       | C(16)-N(2)   | 1.4703(16) |
| C(6)-N(2)   | 1.4147(18) | C(16)-H(16A) | 0.96       |
| C(7)-O(1)   | 1.2165(16) | C(16)-H(16B) | 0.96       |
| C(7)-N(2)   | 1.3605(17) | C(16)-H(16C) | 0.96       |
| C(7)-C(8)   | 1.5221(17) | B(1)-F(1B)   | 1.20(3)    |
| C(8)-C(9)   | 1.4940(16) | B(1)-F(1)    | 1.369(5)   |
| C(8)-H(8A)  | 0.97       | B(1)-F(2B)   | 1.37(2)    |
| C(8)-H(8B)  | 0.97       | B(1)-F(2)    | 1.400(4)   |
| C(9)-N(1)   | 1.3029(16) | B(1)-O(2)    | 1.4302(19) |
| C(9)-C(10)  | 1.4463(17) | B(1)-N(1)    | 1.6031(16) |
| C(10)-C(15) | 1.4030(19) |              |            |

Table 3: Angles (°)

|                   |            |                     |            |
|-------------------|------------|---------------------|------------|
| C(2)-C(1)-C(6)    | 119.89(12) | C(13)-C(12)-H(12)   | 120.2      |
| C(2)-C(1)-N(1)    | 118.32(11) | C(14)-C(13)-C(12)   | 121.27(14) |
| C(6)-C(1)-N(1)    | 121.78(11) | C(14)-C(13)-H(13)   | 119.4      |
| C(3)-C(2)-C(1)    | 120.46(13) | C(12)-C(13)-H(13)   | 119.4      |
| C(3)-C(2)-H(2)    | 119.8      | C(13)-C(14)-C(15)   | 119.69(15) |
| C(1)-C(2)-H(2)    | 119.8      | C(13)-C(14)-H(14)   | 120.2      |
| C(2)-C(3)-C(4)    | 119.61(14) | C(15)-C(14)-H(14)   | 120.2      |
| C(2)-C(3)-H(3)    | 120.2      | O(2)-C(15)-C(14)    | 118.55(13) |
| C(4)-C(3)-H(3)    | 120.2      | O(2)-C(15)-C(10)    | 121.39(11) |
| C(5)-C(4)-C(3)    | 120.59(13) | C(14)-C(15)-C(10)   | 120.00(13) |
| C(5)-C(4)-H(4)    | 119.7      | N(2)-C(16)-H(16A)   | 109.5      |
| C(3)-C(4)-H(4)    | 119.7      | N(2)-C(16)-H(16B)   | 109.5      |
| C(4)-C(5)-C(6)    | 120.69(13) | H(16A)-C(16)-H(16B) | 109.5      |
| C(4)-C(5)-H(5)    | 119.7      | N(2)-C(16)-H(16C)   | 109.5      |
| C(6)-C(5)-H(5)    | 119.7      | H(16A)-C(16)-H(16C) | 109.5      |
| C(5)-C(6)-C(1)    | 118.74(13) | H(16B)-C(16)-H(16C) | 109.5      |
| C(5)-C(6)-N(2)    | 119.62(11) | F(1B)-B(1)-F(1)     | 100.5(16)  |
| C(1)-C(6)-N(2)    | 121.63(11) | F(1B)-B(1)-F(2B)    | 119.5(13)  |
| O(1)-C(7)-N(2)    | 122.70(12) | F(1)-B(1)-F(2B)     | 19(2)      |
| O(1)-C(7)-C(8)    | 122.18(12) | F(1B)-B(1)-F(2)     | 9.9(17)    |
| N(2)-C(7)-C(8)    | 115.06(11) | F(1)-B(1)-F(2)      | 109.7(2)   |
| C(9)-C(8)-C(7)    | 106.05(10) | F(2B)-B(1)-F(2)     | 129(2)     |
| C(9)-C(8)-H(8A)   | 110.5      | F(1B)-B(1)-O(2)     | 113.2(9)   |
| C(7)-C(8)-H(8A)   | 110.5      | F(1)-B(1)-O(2)      | 111.7(2)   |
| C(9)-C(8)-H(8B)   | 110.5      | F(2B)-B(1)-O(2)     | 98.3(18)   |
| C(7)-C(8)-H(8B)   | 110.5      | F(2)-B(1)-O(2)      | 111.52(16) |
| H(8A)-C(8)-H(8B)  | 108.7      | F(1B)-B(1)-N(1)     | 113.5(12)  |
| N(1)-C(9)-C(10)   | 119.22(11) | F(1)-B(1)-N(1)      | 108.9(2)   |
| N(1)-C(9)-C(8)    | 118.55(11) | F(2B)-B(1)-N(1)     | 101.9(12)  |
| C(10)-C(9)-C(8)   | 122.01(11) | F(2)-B(1)-N(1)      | 106.11(18) |
| C(15)-C(10)-C(11) | 118.73(12) | O(2)-B(1)-N(1)      | 108.71(11) |
| C(15)-C(10)-C(9)  | 118.78(11) | C(9)-N(1)-C(1)      | 120.40(10) |
| C(11)-C(10)-C(9)  | 122.45(12) | C(9)-N(1)-B(1)      | 120.98(10) |
| C(12)-C(11)-C(10) | 120.63(15) | C(1)-N(1)-B(1)      | 118.61(10) |
| C(12)-C(11)-H(11) | 119.7      | C(7)-N(2)-C(6)      | 122.14(10) |
| C(10)-C(11)-H(11) | 119.7      | C(7)-N(2)-C(16)     | 117.83(12) |
| C(11)-C(12)-C(13) | 119.57(15) | C(6)-N(2)-C(16)     | 119.14(12) |
| C(11)-C(12)-H(12) | 120.2      | C(15)-O(2)-B(1)     | 119.95(11) |



Table 4: Anisotropic displacement parameters ( $\text{\AA}^2 \times 10^3$ ) The anisotropic displacement factor exponent takes the form:  $-2 \pi^2 [ h^2 a^{*2} U_{11} + \dots + 2 h k a^* b^* U_{12} ]$

|       | U11     | U22     | U33     | U23    | U13     | U12    |
|-------|---------|---------|---------|--------|---------|--------|
| C(1)  | 37(1)   | 30(1)   | 45(1)   | -2(1)  | 6(1)    | 1(1)   |
| C(2)  | 53(1)   | 46(1)   | 46(1)   | 2(1)   | 9(1)    | 3(1)   |
| C(3)  | 72(1)   | 49(1)   | 48(1)   | -2(1)  | -5(1)   | 10(1)  |
| C(4)  | 57(1)   | 43(1)   | 70(1)   | -6(1)  | -17(1)  | 4(1)   |
| C(5)  | 40(1)   | 39(1)   | 74(1)   | -1(1)  | -1(1)   | -2(1)  |
| C(6)  | 37(1)   | 29(1)   | 53(1)   | -2(1)  | 7(1)    | -1(1)  |
| C(7)  | 43(1)   | 36(1)   | 46(1)   | -3(1)  | 13(1)   | -11(1) |
| C(8)  | 41(1)   | 32(1)   | 46(1)   | 2(1)   | 9(1)    | 0(1)   |
| C(9)  | 35(1)   | 33(1)   | 39(1)   | -1(1)  | 14(1)   | 2(1)   |
| C(10) | 35(1)   | 43(1)   | 39(1)   | -2(1)  | 12(1)   | 1(1)   |
| C(11) | 47(1)   | 53(1)   | 49(1)   | 3(1)   | 10(1)   | 7(1)   |
| C(12) | 48(1)   | 81(1)   | 50(1)   | 7(1)   | 5(1)    | 12(1)  |
| C(13) | 43(1)   | 90(1)   | 47(1)   | -6(1)  | 4(1)    | -6(1)  |
| C(14) | 47(1)   | 68(1)   | 50(1)   | -7(1)  | 9(1)    | -14(1) |
| C(15) | 38(1)   | 50(1)   | 44(1)   | -2(1)  | 13(1)   | -4(1)  |
| C(16) | 48(1)   | 54(1)   | 81(1)   | -7(1)  | 31(1)   | -2(1)  |
| B(1)  | 35(1)   | 34(1)   | 57(1)   | 7(1)   | 8(1)    | -3(1)  |
| F(1)  | 44(1)   | 34(1)   | 100(2)  | 10(1)  | -6(1)   | 2(1)   |
| F(2)  | 47(2)   | 59(1)   | 56(1)   | 11(1)  | 23(1)   | -6(1)  |
| F(1B) | 177(15) | 117(10) | 66(6)   | -17(6) | 53(8)   | -89(9) |
| F(2B) | 71(7)   | 33(5)   | 220(20) | -15(9) | -37(10) | 6(4)   |
| N(1)  | 32(1)   | 32(1)   | 41(1)   | -1(1)  | 11(1)   | -1(1)  |
| N(2)  | 36(1)   | 40(1)   | 55(1)   | -2(1)  | 17(1)   | -3(1)  |
| O(1)  | 64(1)   | 62(1)   | 47(1)   | 3(1)   | 19(1)   | -10(1) |
| O(2)  | 53(1)   | 40(1)   | 60(1)   | 1(1)   | 4(1)    | -11(1) |

Table 5: Torsion angles (°)

|                         |             |                       |             |
|-------------------------|-------------|-----------------------|-------------|
| C(6)-C(1)-C(2)-C(3)     | -0.4(2)     | C(10)-C(9)-N(1)-B(1)  | -1.82(16)   |
| N(1)-C(1)-C(2)-C(3)     | 178.16(12)  | C(8)-C(9)-N(1)-B(1)   | -176.56(10) |
| C(1)-C(2)-C(3)-C(4)     | -1.0(2)     | C(2)-C(1)-N(1)-C(9)   | 130.07(12)  |
| C(2)-C(3)-C(4)-C(5)     | 1.4(2)      | C(6)-C(1)-N(1)-C(9)   | -51.43(16)  |
| C(3)-C(4)-C(5)-C(6)     | -0.3(2)     | C(2)-C(1)-N(1)-B(1)   | -49.07(15)  |
| C(4)-C(5)-C(6)-C(1)     | -1.1(2)     | C(6)-C(1)-N(1)-B(1)   | 129.43(12)  |
| C(4)-C(5)-C(6)-N(2)     | 179.41(12)  | F(1B)-B(1)-N(1)-C(9)  | -100.6(15)  |
| C(2)-C(1)-C(6)-C(5)     | 1.40(18)    | F(1)-B(1)-N(1)-C(9)   | 148.3(2)    |
| N(1)-C(1)-C(6)-C(5)     | -177.08(11) | F(2B)-B(1)-N(1)-C(9)  | 130(2)      |
| C(2)-C(1)-C(6)-N(2)     | -179.08(11) | F(2)-B(1)-N(1)-C(9)   | -93.69(17)  |
| N(1)-C(1)-C(6)-N(2)     | 2.44(18)    | O(2)-B(1)-N(1)-C(9)   | 26.37(15)   |
|                         |             |                       | 78.5(15)    |
| O(1)-C(7)-C(8)-C(9)     | 109.22(13)  | F(1B)-B(1)-N(1)-C(1)  |             |
| N(2)-C(7)-C(8)-C(9)     | -68.13(14)  | F(1)-B(1)-N(1)-C(1)   | -32.6(2)    |
| C(7)-C(8)-C(9)-N(1)     | 73.19(13)   | F(2B)-B(1)-N(1)-C(1)  | -51(2)      |
| C(7)-C(8)-C(9)-C(10)    | -101.40(12) | F(2)-B(1)-N(1)-C(1)   | 85.44(16)   |
| N(1)-C(9)-C(10)-C(15)   | -14.00(16)  | O(2)-B(1)-N(1)-C(1)   | -154.50(10) |
| C(8)-C(9)-C(10)-C(15)   | 160.56(11)  | O(1)-C(7)-N(2)-C(6)   | 172.79(12)  |
| N(1)-C(9)-C(10)-C(11)   | 168.25(11)  | C(8)-C(7)-N(2)-C(6)   | -9.88(16)   |
| C(8)-C(9)-C(10)-C(11)   | -17.20(17)  | O(1)-C(7)-N(2)-C(16)  | 3.74(19)    |
| C(15)-C(10)-C(11)-C(12) | -1.05(19)   | C(8)-C(7)-N(2)-C(16)  | -178.93(11) |
| C(9)-C(10)-C(11)-C(12)  | 176.71(12)  | C(5)-C(6)-N(2)-C(7)   | -129.51(13) |
| C(10)-C(11)-C(12)-C(13) | -1.8(2)     | C(1)-C(6)-N(2)-C(7)   | 50.98(17)   |
| C(11)-C(12)-C(13)-C(14) | 2.2(2)      | C(5)-C(6)-N(2)-C(16)  | 39.39(17)   |
| C(12)-C(13)-C(14)-C(15) | 0.3(2)      | C(1)-C(6)-N(2)-C(16)  | -140.11(13) |
| C(13)-C(14)-C(15)-O(2)  | 179.70(12)  | C(14)-C(15)-O(2)-B(1) | -156.93(12) |
| C(13)-C(14)-C(15)-C(10) | -3.20(19)   | C(10)-C(15)-O(2)-B(1) | 26.01(17)   |
| C(11)-C(10)-C(15)-O(2)  | -179.43(11) | F(1B)-B(1)-O(2)-C(15) | 89.2(18)    |
| C(9)-C(10)-C(15)-O(2)   | 2.73(17)    | F(1)-B(1)-O(2)-C(15)  | -158.1(2)   |
| C(11)-C(10)-C(15)-C(14) | 3.55(18)    | F(2B)-B(1)-O(2)-C(15) | -143.6(18)  |
| C(9)-C(10)-C(15)-C(14)  | -174.29(11) | F(2)-B(1)-O(2)-C(15)  | 78.7(2)     |
| C(10)-C(9)-N(1)-C(1)    | 179.06(10)  | N(1)-B(1)-O(2)-C(15)  | -37.92(15)  |
| C(8)-C(9)-N(1)-C(1)     | 4.32(15)    |                       |             |

Table 6: Calculated reflections from PowderCell\*

| h  | k | l | 2 $\theta$ /° | d/Å   | I/rel. | F(hkl) |
|----|---|---|---------------|-------|--------|--------|
| 1  | 0 | 0 | 8.72          | 10.14 | 51.01  | 59.64  |
| 0  | 0 | 2 | 9.33          | 9.47  | 100.00 | 89.42  |
| -1 | 0 | 2 | 12.24         | 7.23  | 40.24  | 74.62  |
| 0  | 1 | 1 | 12.87         | 6.87  | 16.86  | 35.95  |
| 1  | 0 | 2 | 13.30         | 6.65  | 10.34  | 41.16  |
| 1  | 1 | 0 | 14.84         | 5.96  | 36.99  | 61.55  |
| 0  | 1 | 2 | 15.21         | 5.82  | 50.92  | 74.05  |
| -1 | 1 | 1 | 15.35         | 5.77  | 93.52  | 101.24 |
| -1 | 1 | 2 | 17.17         | 5.16  | 3.18   | 20.95  |
| 2  | 0 | 0 | 17.48         | 5.07  | 7.46   | 46.22  |
| 1  | 1 | 2 | 17.94         | 4.94  | 5.45   | 28.67  |
| -2 | 0 | 2 | 19.15         | 4.63  | 3.55   | 34.99  |
| -1 | 1 | 3 | 19.96         | 4.45  | 59.56  | 105.81 |
| -1 | 0 | 4 | 20.01         | 4.43  | 6.25   | 48.59  |
| 2  | 0 | 2 | 20.53         | 4.32  | 4.79   | 43.70  |
| 1  | 1 | 3 | 20.96         | 4.23  | 8.67   | 42.48  |
| 2  | 1 | 0 | 21.25         | 4.18  | 41.19  | 93.92  |
| 1  | 0 | 4 | 21.34         | 4.16  | 17.15  | 86.05  |
| -2 | 1 | 1 | 21.45         | 4.14  | 5.88   | 35.82  |
| 2  | 1 | 1 | 22.08         | 4.02  | 3.94   | 30.23  |
| 0  | 1 | 4 | 22.29         | 3.99  | 20.84  | 70.20  |
| -1 | 1 | 4 | 23.39         | 3.80  | 15.63  | 63.94  |
| 0  | 2 | 0 | 24.12         | 3.69  | 12.59  | 83.77  |
| 1  | 1 | 4 | 24.54         | 3.62  | 11.95  | 58.79  |
| 0  | 2 | 1 | 24.58         | 3.62  | 3.99   | 34.03  |
| -2 | 0 | 4 | 24.62         | 3.61  | 60.15  | 187.14 |
| -2 | 1 | 3 | 24.72         | 3.60  | 14.81  | 65.93  |
| 1  | 2 | 0 | 25.69         | 3.47  | 9.58   | 55.23  |
| -1 | 2 | 1 | 25.99         | 3.43  | 10.19  | 57.67  |
| 1  | 2 | 1 | 26.25         | 3.39  | 60.12  | 141.56 |
| 2  | 1 | 3 | 26.35         | 3.38  | 2.07   | 26.35  |
| -1 | 2 | 2 | 27.13         | 3.28  | 17.05  | 78.05  |
| -2 | 1 | 4 | 27.47         | 3.24  | 6.77   | 49.81  |
| 0  | 2 | 3 | 28.00         | 3.18  | 3.26   | 35.28  |
| 3  | 1 | 1 | 29.79         | 3.00  | 3.56   | 39.41  |

Source: Cu-K $_{\alpha 1}$  ( $\lambda = 1.540598 \text{ \AA}$ )

Condition on reflections:  $I \geq 2$

Range (2 $\theta$ ): From 3° to 30°

\*PowderCell for Windows (version 2.4) by Kraus W. & Nolze G., Federal institute for materials Research and testing, Rudower Chausse 5, 12489 Berlin Germany.
